# Supplementary material for: Combinatorial deployment of F-actin regulators to build complex 3D actin structures in vivo
Source: eLife. 2021 May 5;10:e63046. doi: 10.7554/eLife.63046 (PMC8149123; doi:10.7554/eLife.63046)
Supplement: Figure 1—source data 1. [file elife-63046-fig1-data1.xlsx]

## Sheet: B
Time points/Normalized cap area	Time(s)/Caps	0626_1	0626_2	0626_3	0626_4	0716_1	0716_2	0716_3	0904_1	0904_2	0904_3	0904_4	0904_5	0911_1	0911_2	0911_3							WT cycle 11 cap size change (average)	SEM
1	0	1	1	1	1	1	1	1	1	1	1	1	1	1	1	1						0	1	0
2		1.57839	1.21809	1.12765	1.06606	1.21014	1.17914	1.05533	1.46951	1.94852	2.64018	1.82107	1.63422	1.50163	1.35845	1.54502							1.49023	0.107816
3		1.82746	1.37855	1.34005	1.59388	1.61594	1.47266	1.10719	2.21768	3.35484	3.18985	2.71696	1.93833	1.51249	2.03196	2.41992							1.98118	0.175464
4		2.02326	1.53191	1.35504	1.97983	2.20792	2.02806	1.5823	2.57195	3.56966	3.97903	3.14027	2.948	1.93702	2.02626	2.81992							2.38003	0.198465
5		2.83646	2.81738	1.75762	2.04868	2.55017	2.27266	1.77317	2.67622	4.42485	4.24834	3.64776	3.06892	2.70575	2.47374	3.12351							2.82835	0.204702
6		3.3961	3.5	2.09199	2.35814	2.88517	2.68273	2.09889	3.49512	4.28826	4.90066	4.27244	3.25453	3.2519	2.66781	3.30598							3.22998	0.209812
7		3.93623	4.24379	1.86047	2.44924	3.11817	3.54245	3.01798	3.71768	4.40494	5.32119	4.00249	4.13603	3.39522	2.64041	3.65259							3.56259	0.223288
8		3.73143	4.85372	2.2093	2.38665	3.03456	4.49281	4.21992	3.67012	4.47083	6.46137	3.95075	4.94196	3.47014	2.93037	4.26375							3.93918	0.280741
9		3.95274	4.82092	2.04755	2.55633	3.66722	5.2518	4.70124	4.20061	4.94235	7.65784	5.07606	5.78476	4.19761	2.90297	4.451							4.41407	0.35367
10		4.34809	5.36791	2.36951	2.76982	3.63545	5.91223	4.83195	4.38354	5.01373	7.76269	5.25623	5.82709	5.10858	3.43836	4.56733							4.70617	0.346966
11		5.69092	5.32801	2.41395	2.96662	3.94203	6.38058	4.88797	4.88232	5.06932	8.08389	4.90212	5.9208	5.13464	3.69178	4.63665							4.92877	0.356016
12		5.49812	5.6844	2.51628	2.94645	4.61538	6.64532	5.02905	5.23171	5.32121	7.99558	5.63466	5.57981	5.07926	3.71119	4.66215							5.07671	0.348609
13	60	6.51388	5.92642	2.6124	3.02086	4.94203	6.97626	5.28769	5.20061	5.62938	7.98565	5.42893	5.14027	5.0684	3.70776	4.63586						60	5.20509	0.361806
14		6.73518	5.91755	2.8708	3.2128	4.80268	7.03525	5.28838	4.95793	5.78037	8.23841	5.34975	5.17231	5.557	3.84703	5.36016							5.34171	0.359316
15		7.08552	5.62234	3.42997	3.48053	4.767	7.59137	5.31743	4.81159	5.73233	7.87969	5.0293	5.03325	5.62324	3.76826	5.1992							5.35807	0.346885
16		6.93623	5.90957	3.49251	4.10431	4.699	7.33165	5.3769	5.03476	5.74743	8.16667	4.84913	4.95466	5.72096	3.86301	5.21036							5.42648	0.331385
17		6.85146	6.77837	3.95297	4.03686	4.58138	6.95468	5.35961	5.30732	5.64997	8.17329	4.92768	5.11971	5.81216	3.91895	5.86295							5.55249	0.318779
18		6.75319	6.66844	3.69044	4.24826	4.39242	7.44604	5.64523	4.88841	5.78518	8.21523	4.65648	5.0393	5.90011	3.99543	6.13386							5.56387	0.340364
19		6.76594	6.94238	3.66202	4.43115	4.39855	7.89281	5.70609	4.82622	5.90734	8.12914	4.65711	5.09371	6.39739	4.43037	6.40797							5.70988	0.349869
20		6.7967	6.96365	3.60258	4.76078	4.48049	7.81727	5.7379	4.91159	5.90391	8.32671	4.68142	4.98005	6.26602	5.05479	6.54343							5.78849	0.341576
21		6.74869	6.86082	3.78036	4.77121	4.64827	7.33957	5.62586	4.90366	5.82018	8.17881	4.58105	5.0127	6.30185	5.07534	6.61036							5.75058	0.315134
22		6.86422	6.78014	3.7969	4.81502	5.04013	7.11942	5.51867	4.65915	5.97941	7.47461	4.4707	4.94256	6.43865	5.94292	6.64622							5.76592	0.286527
23		6.7892	7.21277	3.63307	4.78651	5.11315	7.07914	5.6473	4.70427	5.92107	7.36976	4.41022	4.96917	7.08795	5.9395	6.34582							5.80059	0.301629
24		7.03376	7.13032	3.46098	4.77191	4.84225	7.37698	5.38728	4.59878	5.92176	7.25828	4.54863	4.91959	7.13029	6.41895	6.47092							5.81804	0.323064
25	120	6.57164	6.88741	3.48734	4.94298	4.95206	7.17266	5.7538	4.46646	5.779	7.07174	4.24439	4.98609	7.22476	6.52283	6.25737						120	5.7547	0.306092
26		6.26632	6.88652	3.49251	5.01321	4.72018	7.08058	5.62102	4.47805	5.79341	7.13576	4.29613	5.06469	7.69707	6.62443	5.91474							5.73897	0.314336
27		6.44111	6.84752	3.65685	4.92142	4.7029	6.99353	5.92669	4.32134	5.70899	7.21523	4.19389	5.0266	7.62541	6.32763	5.99522							5.72695	0.312146
28		6.24306	7.18972	3.69406	4.79068	4.64994	6.94748	5.57538	4.28659	5.59369	7.1457	4.05798	5.08525	7.3279	6.42123	6.26853							5.68515	0.31398
29		5.92798	6.92996	3.55349	4.81919	4.86622	6.85324	5.38243	4.21524	5.59986	7.04084	4.11035	5.19407	7.62866	6.73516	6.0502							5.66046	0.314415
30		5.75544	6.98936	3.2832	4.79833	4.93534	6.67338	5.14315	4.19329	5.55868	7.15342	3.94888	5.12092	7.51683	6.42466	5.90199							5.55979	0.320253
31		5.95724	7.02571	3.24806	4.75243	4.90691	6.94748	5.426	4.30427	5.51887	7.25607	3.95387	4.98186	7.88817	6.32534	5.89084							5.62554	0.338717
32		5.54539	6.93706	3.16693	4.71627	4.61929	6.7964	5.36445	4.35549	5.3919	7.24172	4.0505	4.85127	7.59501	6.61073	5.75538							5.53319	0.332006
33		5.31958	6.55142	3.16331	4.84214	4.70736	6.81367	5.27939	4.32256	5.07481	7.50331	4.02431	4.83797	7.85016	6.68151	5.86295							5.5223	0.342772
34		5.52738	6.54255	3.23979	4.5758	4.52787	6.44532	5.30429	4.31768	5.0604	7.8245	4.13092	4.91173	7.48969	6.31849	5.91315							5.4753	0.330458
35		5.6039	6.32092	3.14367	4.82545	4.65217	6.47554	5.26487	4.35122	5.03294	7.84989	4.22943	4.87183	7.36699	6.63014	6.06135							5.51202	0.32778
36		5.56339	6.4477	3.28114	4.60083	4.5864	6.28993	4.7455	4.31768	5.09334	7.87086	4.15586	4.84946	7.44517	6.61301	5.9251							5.45236	0.332703
37	180	5.23481	6.62411	3.26512	4.67594	4.67336	6.29065	4.75864	4.31829	4.85724	7.87748	4.18641	5.0127	7.21933	6.91667	6.04542						180	5.46374	0.334746
38		5.31433	6.5594	3.10181	4.47983	4.75975	6.43453	4.5574	4.24878	4.92519	8.03642	4.13466	4.92322	7.31596	6.63128	5.80956							5.41548	0.347447
39		5.12378	6.73227	3.16796	4.30807	4.69788	6.49424	4.52697	4.28171	4.87989	7.95916	4.04302	4.92201	7.38436	6.7363	5.75458							5.40081	0.355015
40		5.2168	6.71454	2.90129	4.47775	4.87402	6.4259	4.69986	4.28293	5.02196	8.16887	3.95137	4.95828	7.10423	6.87329	5.66853							5.42264	0.359666
41		5.35859	6.47518	3.01395	4.31711	4.95262	6.3223	4.7213	4.30427	4.9348	8.5	4.00686	4.89178	7.5418	6.95548	5.51235							5.45389	0.376305
42		5.24081	6.77571	3.02894	4.4096	4.94259	6.40432	4.74965	4.4378	5.04049	8.62141	4.00062	4.79383	7.58849	6.85388	5.71155							5.50665	0.382657
43		5.32858	6.94504	3.00517	4.58693	5.05017	6.24676	4.94952	4.67866	5.11668	8.66998	4.08105	4.94075	7.96851	6.89612	5.651							5.60766	0.386231
44		5.42911	6.94415	3.00982	4.38039	4.81215	6.30216	4.95021	4.80366	5.11531	8.53642	4.27307	4.83736	7.9924	6.89498	5.67012							5.59675	0.383019
45		5.57839	7.17908	2.95142	4.72949	4.76087	6.2777	4.85546	4.80183	5.32189	8.45143	4.35037	4.93894	7.77524	6.9532	5.70757							5.64219	0.374012
46		5.5859	7.27216	2.96693	4.96592	4.86065	6.23381	5.01107	4.78476	5.28003	8.43488	4.2899	4.84341	7.71987	7.10616	5.89721							5.68351	0.373306
47		5.71493	7.10461	2.89044	4.8032	4.94036	6.23669	4.93776	4.84207	5.2663	8.50221	4.28367	4.81983	7.8013	7.08333	5.86295							5.67264	0.378083
48		5.50188	7.39982	2.97674	5.02503	4.81382	6.36187	5.08022	4.97134	5.22512	8.43819	4.42768	4.72733	7.73398	7.40411	5.83506							5.72815	0.379689
49	240	5.67517	7.50887	3.15711	5.27955	4.7854	6.50647	5.21923	4.92744	5.17364	8.1479	4.30985	4.76602	7.71227	7.17466	5.7745						240	5.74121	0.36193
50		5.60765	7.31826	3.20465	5.30529	4.8194	6.61655	5.53043	4.67927	5.12491	8.0287	4.14713	4.71342	8.09881	7.24658	6.01275							5.76359	0.371725
51		5.76969	7.36082	3.22791	5.09666	4.90858	6.53957	5.31812	4.725	5.27591	8.0011	4.26621	4.80774	8.29207	7.68836	6.05976							5.8225	0.381536
52		5.77944	7.28457	3.35452	5.10083	4.68729	6.36906	5.50346	4.87439	5.2011	8.18322	4.30798	4.56651	8.33008	7.81621	6.17291							5.83544	0.387623
53		5.83946	7.86082	3.52661	5.1975	4.82553	6.38561	5.72614	4.76829	5.20865	8.1479	4.12095	4.62938	8.48208	8.04224	6.24143							5.93351	0.404397
54		5.8162	7.8484	3.59276	5.31015	4.84504	6.39209	5.65076	4.85061	5.06383	8.14901	4.12781	4.54897	8.46797	8.03196	6.20558							5.92674	0.40201
55		5.79595	8.07358	3.66615	5.32476	4.95095	6.36906	5.68741	4.91951	5.06108	8.06733	4.14651	4.56832	8.64604	8.4121	6.41355							6.00682	0.4162
56		5.83046	7.87943	3.7261	5.23227	5.06577	6.34748	5.56501	4.99756	5.09815	7.87196	4.19763	4.40266	8.46254	8.31507	6.42789							5.96133	0.397675
57		5.64816	7.84486	3.89354	5.29416	5.03456	6.47482	5.67012	4.66646	4.99725	7.84106	4.24688	4.38029	8.76221	8.55708	6.65418							5.99771	0.415162
58		5.9955	7.59929	3.84755	5.37691	5.14716	6.47194	5.49793	4.79878	4.9396	7.84437	4.12032	4.43349	8.33116	8.36986	6.80319							5.9718	0.39292
59		5.91148	7.74557	4.02532	5.54103	5.19287	6.22014	5.713	4.91098	4.98696	7.62583	4.11783	4.49819	8.49294	8.74886	6.86932							6.04002	0.397033
60		5.66467	7.98404	4.21912	5.80668	5.50056	6.22302	5.7545	4.93232	5.07001	7.71413	4.22257	4.3821	8.37568	8.5468	7.08207							6.09855	0.387252
61	300	6.0075	7.79787	4.14419	5.79555	5.48384	6.35971	5.90871	4.97195	5.07687	7.79912	4.02182	4.42261	8.45711	8.72717	6.97849						300	6.13017	0.395497
62		6.01425	8.1906	4.36021	5.85953	5.54013	6.55396	5.96611	4.9378	5.24914	8.13797	3.94763	4.53325	8.15744	9.10959	6.96972							6.23516	0.408765
63		6.08177	7.86436	4.12661	6.24339	5.63043	6.66547	6.21853	4.95244	5.25806	8.15121	4.14776	4.4734	8.00434	8.97831	7							6.25307	0.394259
64		6.16654	8.10106	4.01499	5.85953	5.57023	6.75612	6.03389	4.7378	5.34248	8.30243	4.23067	4.52842	8.2975	8.72945	6.54821							6.21462	0.403086
65		6.21605	7.64894	4.20879	5.85814	5.7553	6.75252	6.16113	4.81402	5.37955	8.22848	4.37032	4.57074	8.04126	8.78653	6.64701							6.22925	0.375844
66		6.42386	7.58599	4.08837	6.25174	5.76366	7.03094	6.10788	4.94024	5.32807	8.27925	4.38529	4.55744	8.19001	8.76941	6.47649							6.27858	0.381286
67		6.49437	7.06915	4.11473	5.89221	6.04292	6.62446	6.03942	4.89451	5.53123	8.12472	4.09352	4.6977	8.32248	8.86986	6.46693							6.21855	0.376483
68		6.71118	7.19858	4.15814	5.63213	6.12542	6.84748	6.29806	4.89329	5.75909	8.35099	4.08978	4.5919	8.41802	8.99429	5.91713							6.2657	0.393369
69		6.24681	7.48404	4.1845	5.79555	6.17893	7.00504	6.07261	4.81585	5.71174	8.07174	4.08915	4.54414	8.68621	8.91438	6.12829							6.26193	0.395772
70		6.37134	7.29078	4.27855	5.92837	6.16276	7.13453	6.53804	4.93598	5.89911	8.14018	4.25748	4.56288	8.72204	8.96575	6.21673							6.3603	0.387329
71		6.50338	8.02128	4.32972	5.87622	6.12653	7.06475	6.73029	4.94817	5.83185	8.15342	4.30112	4.6445	8.70141	8.86301	6.10598							6.41344	0.391969
72		6.43436	7.78191	4.1447	5.75939	6.11148	7.28633	6.89765	4.84451	6.06108	7.93377	4.39589	4.63785	8.64604	8.85046	6.05259							6.3892	0.388532
73	360	6.50113	7.84663	4.25168	5.55981	6.11093	7.07122	6.89972	5.01524	6.13864	7.97461	4.38342	4.67533	8.64495	8.94292	6.08685						360	6.40687	0.386178
74		6.65116	7.89539	4.4	5.75382	6.27369	7.61727	7.38935	4.83415	6.22924	7.87638	4.47506	4.45224	8.2291	9.3847	6.19442							6.5104	0.399206
75		6.83271	7.90514	4.33023	6.04103	6.45541	7.88561	6.8769	4.95244	6.19698	8.09934	4.51434	4.46312	8.17047	9.34817	6.39442							6.56442	0.396745
76		6.89947	7.95567	4.38398	5.94506	6.35173	7.70432	6.99585	4.94329	6.15305	8.31898	4.49002	4.35067	8.19327	9.86416	6.49084							6.60269	0.421567
77		6.83721	8.01684	4.3137	5.9541	6.40245	8.01151	7.2379	5.05305	6.16129	7.96358	4.2207	4.43954	8.34636	9.91096	6.4749							6.62294	0.430614
78		6.62791	8.01152	4.33023	5.94993	6.31215	7.61727	7.16528	4.77256	6.07344	7.86203	4.16209	4.38936	8.60043	9.90982	6.33625							6.54135	0.436541
79		6.88747	8.35372	4.36641	6.05981	6.34058	7.49281	7.23928	5.02134	5.93617	7.81898	4.27182	4.3162	8.53312	10.0731	6.61514							6.62173	0.439476
80		6.94749	8.03103	4.36641	5.87761	6.09253	7.71295	7.20747	4.83598	5.8895	7.97792	4.17145	4.12092	8.64821	9.92123	6.4247							6.54836	0.448914
81		7.26707	7.54078	4.45788	5.57719	6.16165	7.58705	7.56432	4.87012	5.96294	8.15673	4.08354	4.22007	8.7025	9.92123	6.33147							6.5603	0.449227
82		7.15304	8.13475	4.53953	5.75035	6.08194	7.8446	7.44537	5.32744	6.13178	8.54636	4.50748	4.57437	8.49511	9.75685	6.23108							6.70134	0.424314
83		7.14179	7.7633	4.46202	5.80181	5.96098	7.47482	7.6065	5.23902	6.13246	8.3543	4.36035	4.36276	8.44408	9.64384	6.76414							6.63414	0.419105
84		6.9925	7.3617	4.48165	5.89986	6.06633	8.6223	7.52766	5.1939	6.20522	8.65342	4.48254	4.52358	8.71661	9.69863	6.63267							6.73724	0.435844
85	420	6.60915	7.55762	4.49561	5.93185	5.97269	7.91007	7.2621	5.18354	6.36651	8.71523	4.65212	4.50302	8.81759	9.56621	6.62629						420	6.67797	0.418002
86		6.39235	7.97784	4.44393	5.76843	6.04292	7.79928	7.15353	5.0561	6.30062	8.63687	4.52743	4.52418	8.45603	9.5468	6.71793							6.62295	0.418033
87		6.39985	7.91223	4.36486	5.57441	6.08305	7.67554	7.85201	4.98841	6.31434	8.33113	4.25436	4.33192	8.43322	9.37215	6.7012							6.57258	0.426322
88		6.35259	8.11348	4.34315	6.01252	6.14604	6.98849	8.23513	4.89146	6.33288	8.39625	4.27182	4.38573	8.70141	9.43493	6.64064							6.61643	0.435407
89		6.05026	7.91401	4.36279	5.77747	6.39632	6.90719	7.34855	4.83476	6.29307	8.24393	4.31421	4.36759	8.82519	9.23973	6.61753							6.49951	0.41574
90		5.91973	7.32358	4.43411	5.4388	6.30212	6.90719	7.30567	4.8939	6.33699	8.19647	4.23254	4.44982	8.94137	9.24087	6.48048							6.42691	0.411066
91		5.67142	7.42819	4.43411	5.36439	6.48885	6.3705	7.70816	5.00061	6.1606	8.41391	4.11347	4.4867	8.92508	9.21233	6.39203							6.41136	0.422515
92		5.89347	7.30851	4.43669	5.39917	6.30491	6.34317	7.82849	4.99329	6.14962	8.26932	3.91771	4.67836	8.63844	9.21804	6.61673							6.39973	0.412031
93		5.80645	7.04344	4.49767	5.11613	6.26867	6.25036	7.97234	4.97866	6.00824	8.49007	3.72195	4.42805	8.83822	8.42237	6.62948							6.29814	0.414499
94		5.76594	7.1906	4.72713	5.29207	6.06968	6.38561	7.12102	4.88171	6.06932	8.2649	3.89401	4.54474	8.78936	8.75342	6.46534							6.28099	0.392405
95		5.67067	6.71454	4.57778	5.22392	5.81828	5.73022	7.12241	4.88537	6.10844	7.51766	3.86845	4.31439	8.85233	9.08904	6.81036							6.15359	0.399599
96		5.3886	6.81117	4.51886	5.08275	5.66054	5.78417	6.49447	4.94146	5.73507	7.31898	3.84289	4.39541	8.59718	8.50342	6.80558							5.99204	0.367047
97	480	5.22506	6.93528	4.07494	5.10292	5.41973	5.11799	5.86653	4.75732	5.73988	7.36313	3.83416	4.42805	7.95983	8.15982	6.39283						480	5.7585	0.348709
98		5.2018	6.33954	4.02946	4.94367	5.1845	5.01439	6.43707	4.51829	5.93068	7.51766	3.76309	4.30169	7.71444	8.10274	6.53705							5.70241	0.35383
99		5.33383	6.34663	3.91163	4.79277	5.12932	4.89137	6.36584	4.56098	5.72409	6.98896	3.71384	4.12999	6.77633	8.48059	6.55299							5.57994	0.343422
100		5.2048	6.58865	3.72196	4.70584	4.94036	4.41871	5.86307	4.55549	5.77557	6.77263	3.75374	4.16505	6.54615	8.09703	6.31394							5.4282	0.327486
101		5.3886	6.12145	3.44548	4.60431	4.76477	3.8554	6.04703	4.5689	6.07687	7.28808	3.80237	4.25151	6.85233	6.09132	5.9753							5.27558	0.304357
102		5.2093	5.57092	3.40724	4.32545	4.79654	3.65396	5.62863	4.39512	5.66918	6.68212	3.69327	4.33434	5.54397	4.46347	6.16414							4.90251	0.250717
103		5.21005	5.3094	3.38036	4.35883	4.7107	3.88129	5.287	4.33354	5.54907	6.63797	3.74065	4.04655	5.22367	5.27283	5.30518							4.81647	0.220689
104		4.8102	5.49291	3.04651	4.37065	4.61148	3.28058	5.27732	4.75122	5.60124	6.72958	3.58978	4.13966	4.24321	4.38699	5.32351							4.64366	0.248497
105		4.30683	5.3555	2.97674	4.27747	4.25585	2.98633	5.36445	4.29329	5.45848	6.17991	3.62469	3.64692	3.5874	5.58562	5.29641							4.47973	0.259615
106		4.27982	5.16223	2.80879	4.11266	3.98606	3.17842	4.92324	4.07256	4.94509	6.24393	3.50312	3.33253	3.03909	4.2637	5.61912							4.23136	0.256589
107		4.09827	4.20301	2.78553	3.79555	3.82441	2.93669	5.91355	4.1872	4.25875	6.4415	3.48691	3.09371	3.34528	3.52854	5.23108							4.07533	0.272726
108		4.11628	3.98404	2.56227	3.51739	3.77369	2.96619	4.96266	3.84634	4.28826	6.60486	3.42269	3.06227	2.80673	3.06963	4.32829							3.82077	0.261684
109	540	4.11028	4.00089	2.49251	3.49444	3.79487	2.8777	2.78562	3.20061	4.53809	7.17439	3.49564	2.95647	2.60478	3.39726	4.64462						540	3.70454	0.301436
110		3.57989	4.40957	2.42119	3.27955	3.36957	2.72086	3.22061	3.06768	4.86273	7.21854	3.2182	2.68501	2.51792	3.93607	4.32669							3.65561	0.315008

## Sheet: C
Time points/Caps: each time point=5s. expansion dynamics = [Cap area(in Time n+7) - cap area(in Time n) ]/ cap area(in Time n)																	Time (s)	WT cycle 11 expansion rate (average)	SEM
1																	0
2
3
4
5
6
7	2.93623	3.24379	0.860465	1.44924	2.11817	2.54245	2.01798	2.71768	3.40494	4.32119	3.00249	3.13603	2.39522	1.64041	2.65259			2.56259	0.223288
8	1.36407	2.98472	0.959212	1.23875	1.5076	2.81025	2.99869	1.49751	1.29447	1.44732	1.16946	2.02405	1.31092	1.15714	1.75967			1.70159	0.1771
9	1.16297	2.49711	0.52796	0.603839	1.2694	2.56619	3.2461	0.894144	0.4732	1.40069	0.868288	1.9844	1.77531	0.428652	0.839315			1.36917	0.224275
10	1.14905	2.50405	0.748665	0.399017	0.646554	1.91522	2.05376	0.704362	0.404538	0.950902	0.673814	0.97662	1.63733	0.696901	0.619667			1.07203	0.167587
11	1.00635	0.891126	0.37342	0.448065	0.545792	1.80753	1.75663	0.824334	0.145649	0.902832	0.343873	0.929275	0.897673	0.492386	0.484439			0.789958	0.123788
12	0.618953	0.624113	0.202816	0.249484	0.599691	1.47707	1.39605	0.49686	0.240877	0.631532	0.318838	0.714471	0.561937	0.3911	0.410219			0.595601	0.097543
13	0.65485	0.39649	0.404167	0.23339	0.584912	0.969334	0.752062	0.398885	0.277968	0.500726	0.356386	0.242801	0.492805	0.404237	0.269197		60	0.462547	0.0531722
14	0.804986	0.219178	0.299415	0.346154	0.58266	0.565893	0.253196	0.350889	0.292908	0.275026	0.354111	0.0466112	0.601377	0.312817	0.257148			0.370824	0.0490114
15	0.79256	0.166238	0.675164	0.361534	0.299894	0.445479	0.131068	0.145449	0.159839	0.0289709	-0.0092115	-0.129912	0.339628	0.298073	0.168099			0.258191	0.0634306
16	0.595238	0.100908	0.473937	0.481798	0.292548	0.240083	0.112781	0.14856	0.146338	0.0520404	-0.0774523	-0.14972	0.119872	0.123506	0.140789			0.186748	0.052468
17	0.203928	0.272213	0.637551	0.360759	0.162189	0.0899763	0.0964912	0.0870488	0.114541	0.0110595	0.00521429	-0.135301	0.131952	0.0615337	0.264478			0.157576	0.0464894
18	0.228271	0.173113	0.466626	0.441822	-0.0483092	0.120494	0.122525	-0.0656177	0.0871921	0.027471	-0.1736	-0.0968686	0.161608	0.0765918	0.315673			0.122466	0.0480939
19	0.0386963	0.171429	0.40178	0.466851	-0.109971	0.131381	0.0791263	-0.0719897	0.0493782	0.0179682	-0.142168	-0.00905669	0.262211	0.194889	0.382262			0.124186	0.048582
20	0.00913344	0.176779	0.254905	0.481818	-0.0670845	0.111157	0.0850007	-0.00934694	0.0213726	0.0107181	-0.124927	-0.0371712	0.127589	0.313947	0.220752			0.104976	0.0418877
21	-0.0475384	0.220278	0.102155	0.370829	-0.0249065	-0.0331691	0.0580049	0.0191357	0.0153257	0.0379605	-0.0891285	-0.00408408	0.12068	0.346865	0.271418			0.0909216	0.0376933
22	-0.0103829	0.147315	0.087156	0.173162	0.0725979	-0.0289471	0.0263666	-0.0746034	0.040363	-0.0847412	-0.0780406	-0.00244051	0.125451	0.538416	0.275577			0.0804832	0.042036
23	-0.00908792	0.0640858	-0.0809256	0.185702	0.116073	0.0178959	0.0536774	-0.113626	0.0479835	-0.098312	-0.10501	-0.0294048	0.219503	0.515584	0.0823593			0.0577665	0.0419413
24	0.0415463	0.0692635	-0.0621762	0.123261	0.102411	-0.00927536	-0.045694	-0.0592491	0.023609	-0.116485	-0.0231624	-0.0237552	0.208502	0.606571	0.0549493			0.0593544	0.0446446
25	-0.0287172	-0.00791725	-0.0476997	0.115505	0.12584	-0.0912405	0.00836262	-0.074542	-0.0217265	-0.130075	-0.0886212	-0.0211276	0.129328	0.472301	-0.0235016		120	0.0210779	0.0381516
26	-0.0780353	-0.0110757	-0.0305552	0.0530237	0.0534959	-0.0942389	-0.0203688	-0.0882682	-0.0187166	-0.143028	-0.0823012	0.0169965	0.228383	0.310524	-0.0960789			-1.62083e-05	0.032041
27	-0.0455758	-0.00193823	-0.0326726	0.0314823	0.011752	-0.0471476	0.0534726	-0.118752	-0.0191038	-0.117814	-0.0845128	0.00277409	0.210028	0.246739	-0.0930569			-0.000288386	0.0274735
28	-0.0904918	0.0604079	-0.0270859	-0.00505488	-0.0774165	-0.0241512	0.0102757	-0.0799634	-0.0645087	-0.0440047	-0.0923163	0.0288685	0.138111	0.0804841	-0.0568277			-0.0162449	0.0177214
29	-0.126851	-0.0392085	-0.0219061	0.00682842	-0.0482939	-0.0319106	-0.0469018	-0.103953	-0.0542483	-0.0446308	-0.0679955	0.045261	0.0762868	0.133961	-0.0465846			-0.0246765	0.0173095
30	-0.181741	-0.0197687	-0.0513663	0.00553774	0.0192241	-0.0953774	-0.0453145	-0.0881729	-0.061312	-0.0144465	-0.131853	0.0409242	0.0542104	0.000889205	-0.0879202			-0.0437658	0.0169523
31	-0.0934932	0.0200798	-0.0686129	-0.0385481	-0.00911751	-0.0313942	-0.0569712	-0.036314	-0.0450119	0.0260652	-0.0684489	-0.000848794	0.0918245	-0.0302765	-0.0585763			-0.0266429	0.0120504
32	-0.115048	0.0073378	-0.0932228	-0.0592315	-0.0213746	-0.0401341	-0.0456447	-0.0273693	-0.0693046	0.0148492	-0.057176	-0.0421392	-0.01326	-0.0020679	-0.0269433			-0.039382	0.00928373
33	-0.174121	-0.0432418	-0.134963	-0.0161085	0.000948204	-0.0257175	-0.109218	0.000282207	-0.111084	0.0399266	-0.0404341	-0.0375271	0.0294746	0.0559264	-0.0220627			-0.0391947	0.0171368
34	-0.114636	-0.0900123	-0.122971	-0.0448541	-0.0262527	-0.0722792	-0.0486232	0.00725462	-0.0953374	0.0949954	0.0179751	-0.034122	0.0220773	-0.016	-0.0566925			-0.0386319	0.0150996
35	-0.0546697	-0.0878854	-0.115329	0.0012987	-0.0439863	-0.0551123	-0.0218425	0.0322581	-0.101238	0.114908	0.0289701	-0.0620417	-0.0343012	-0.0155932	0.0018438			-0.0275147	0.0152305
36	-0.0333681	-0.0774987	-0.000629624	-0.0411594	-0.0707025	-0.0574601	-0.0773161	0.0296641	-0.083714	0.100293	0.0524155	-0.0530106	-0.00953344	0.0293177	0.00391522			-0.0192525	0.0141425
37	-0.121269	-0.0571609	0.0052506	-0.016096	-0.0475974	-0.0945428	-0.122993	0.00325825	-0.119886	0.0856404	0.0588143	0.00618932	-0.0847901	0.0934849	0.026241		180	-0.0256971	0.0190886
38	-0.0416667	-0.0544409	-0.0205614	-0.0501327	0.0304091	-0.0532444	-0.150445	-0.0244995	-0.086558	0.109739	0.0207788	0.0148305	-0.0367405	0.00310827	0.00941437			-0.0220006	0.0152759
39	-0.0368072	0.0276049	0.00147035	-0.110297	-0.00201303	-0.0468799	-0.14252	-0.00945126	-0.0384095	0.0607532	0.00464756	0.0173707	-0.0593361	0.00820092	-0.0184833			-0.0229434	0.0135244
40	-0.0561889	0.0262873	-0.104482	-0.0214286	0.0764496	-0.00301373	-0.11395	-0.00804971	-0.00759528	0.0440118	-0.0434651	0.00947809	-0.0514642	0.0878049	-0.0413691			-0.0137984	0.0150103
41	-0.0437751	0.0244039	-0.0412625	-0.105347	0.0645818	-0.023664	-0.103244	-0.0107904	-0.0195009	0.0828178	-0.0526238	0.00409531	0.0237288	0.0490702	-0.0905745			-0.016139	0.0151362
42	-0.0579827	0.0508731	-0.0768625	-0.0415659	0.0776616	0.018186	0.000874381	0.0278209	-0.010376	0.0953583	-0.0373537	-0.0114699	0.0192504	0.0364233	-0.0360409			0.00365309	0.0127702
43	0.0179134	0.0484475	-0.0796138	-0.0190363	0.0806298	-0.00697621	0.0401104	0.083451	0.0534125	0.100602	-0.0251675	-0.0143529	0.103775	-0.00297079	-0.0652432			0.0209988	0.0149165
44	0.021598	0.0586566	-0.0296568	-0.0221981	0.0110083	-0.0205725	0.0861912	0.130597	0.0386009	0.0622167	0.0334741	-0.0174383	0.0924607	0.0397659	-0.0240022			0.0307134	0.0126586
45	0.0887262	0.0663682	-0.0683524	0.0978208	0.0134077	-0.0333444	0.0725634	0.121475	0.0905767	0.06185	0.0760216	0.00343938	0.0529334	0.0321979	-0.00816948			0.044501	0.0137758
46	0.0707506	0.0830473	0.022622	0.109023	-0.00274474	-0.0298925	0.0662154	0.11717	0.0513872	0.0325632	0.0856737	-0.0231679	0.0866575	0.0338814	0.040343			0.0495686	0.0116131
47	0.0664987	0.097207	-0.0409808	0.112597	-0.00247608	-0.0135412	0.0458474	0.124947	0.0671766	0.000259707	0.0690836	-0.0147077	0.0344083	0.0183817	0.0636022			0.0418869	0.0128883
48	0.0498139	0.0921104	-0.0172326	0.139568	-0.0260517	-0.00662772	0.0695981	0.120225	0.0366285	-0.0212521	0.106748	-0.0138731	0.019173	0.0802798	0.0216239			0.0433821	0.0143416
49	0.0650429	0.0811846	0.0505589	0.151001	-0.0524283	0.0415755	0.0544921	0.0531735	0.0111335	-0.0602164	0.0560648	-0.0353647	-0.032157	0.0403907	0.0218556		240	0.0297538	0.0145505
50	0.0328866	0.0538746	0.0647321	0.211145	0.00150585	0.0498858	0.117212	-0.0258949	0.00187844	-0.0594776	-0.0294718	-0.0256218	0.0133134	0.0509934	0.0604272			0.0344925	0.0173624
51	0.0342926	0.0253149	0.0936789	0.0776356	0.0310268	0.0417144	0.0952856	-0.016	-0.0086407	-0.0532846	-0.0193465	-0.0265638	0.0664712	0.10573	0.061706			0.0339347	0.0128699
52	0.0346495	0.00170669	0.130639	0.0271671	-0.0356651	0.0216965	0.0982611	0.0187333	-0.0149487	-0.0298351	0.0042145	-0.0571714	0.0790436	0.0999197	0.0467504			0.0283441	0.0140617
53	0.0217905	0.106439	0.220097	0.0820906	-0.0232427	0.0238782	0.159664	-0.0152374	-0.0109475	-0.0416721	-0.0379857	-0.0395133	0.0872651	0.135375	0.0645556			0.048837	0.0210458
54	0.0571312	0.0606206	0.206944	0.0567396	0.00648448	0.00474952	0.112306	-0.0242855	-0.0308683	-0.0342708	-0.0677274	-0.0377286	0.0949038	0.084798	0.0634986			0.0368864	0.0187984
55	0.0212822	0.0752066	0.161238	0.00856164	0.0345952	-0.021119	0.0897045	-0.00160871	-0.0217564	-0.00988892	-0.0378996	-0.0414817	0.121076	0.172474	0.110666			0.04407	0.0186601
56	0.0397324	0.0766808	0.162716	-0.0137633	0.0511219	-0.0406654	0.00625234	0.0680219	-0.00522298	-0.0195216	0.0121768	-0.0659312	0.0449122	0.147448	0.0690432			0.0355334	0.0165539
57	-0.0210636	0.0657594	0.206212	0.0387502	0.0256643	-0.00990099	0.0661899	-0.0123887	-0.0528164	-0.0200028	-0.00453018	-0.0889085	0.0566977	0.112992	0.0980934			0.0307165	0.0191051
58	0.0373832	0.0432031	0.146973	0.0541241	0.0981092	0.0161527	-0.00100528	-0.0155116	-0.0502771	-0.0414081	-0.0435601	-0.0291275	0.000130344	0.0708339	0.102104			0.0258749	0.0154782
59	0.012333	-0.0146611	0.141413	0.0660958	0.0761234	-0.0259126	-0.00229469	0.0299233	-0.0425616	-0.0640748	-0.00075643	-0.0283401	0.00128008	0.0878637	0.1006			0.0224687	0.0152893
60	-0.0260544	0.0172823	0.174338	0.0935045	0.135297	-0.0264491	0.0183576	0.0168448	0.00121984	-0.0533658	0.0229573	-0.0366826	-0.0108988	0.0640989	0.141243			0.0354462	0.0182304
61	0.0365001	-0.0341496	0.130392	0.0884158	0.107633	-0.00146843	0.0389105	0.0106594	0.00311907	-0.0332467	-0.0300707	-0.0318952	-0.0218511	0.0374542	0.0880855		300	0.0258992	0.0143339
62	0.0315234	0.0394914	0.17018	0.119883	0.09364	0.0325286	0.0720766	-0.0119571	0.0296177	0.0337914	-0.0595574	0.0296622	-0.0360534	0.0955519	0.084294			0.0483115	0.0154338
63	0.0767698	0.00248616	0.059862	0.179299	0.118357	0.0294444	0.0967191	0.0612832	0.0521906	0.0395552	-0.0233412	0.021256	-0.0864932	0.0492263	0.0519698			0.0485723	0.0157538
64	0.0285285	0.0660289	0.0435191	0.0897569	0.0821962	0.0439084	0.0974843	-0.0127065	0.0815618	0.0583931	0.0267817	0.0214101	-0.00404014	0.0429624	-0.0374795			0.041887	0.0101558
65	0.0515228	-0.0124757	0.0455771	0.0572289	0.108308	0.0855887	0.0784409	-0.0197417	0.0787228	0.0790274	0.0613172	0.016129	-0.0531833	0.00430585	-0.0323628			0.0365604	0.012737
66	0.134022	-0.0498557	-0.0309897	0.0766467	0.0478314	0.129827	0.0614109	0.00160712	0.0509002	0.073258	0.0385354	0.040011	-0.0221675	0.0260451	-0.0855086			0.0327715	0.0159783
67	0.081044	-0.0934516	-0.00710812	0.0166787	0.101952	0.041629	0.0221208	-0.0155752	0.0894957	0.0417492	0.0178267	0.062201	-0.0159199	0.0163506	-0.0733044			0.0190459	0.0142898
68	0.115879	-0.121117	-0.0463435	-0.0388085	0.105644	0.0447859	0.0556393	-0.00901457	0.0971496	0.0261766	0.0360076	0.0129368	0.0319446	-0.0126566	-0.151023			0.00981335	0.0197877
69	0.027137	-0.0483598	0.0140263	-0.0717309	0.0974161	0.0509444	-0.0234653	-0.0275794	0.0862812	-0.00974949	-0.014129	0.0158129	0.0851872	-0.00712015	-0.12453			0.00334271	0.0158039
70	0.0332117	-0.100022	0.0656455	0.0117493	0.106374	0.0560111	0.083553	0.0418275	0.104188	-0.0195427	0.00633658	0.00761015	0.0511646	0.0270694	-0.0506206			0.0283038	0.01447
71	0.0462225	0.0486787	0.0287328	0.00308642	0.0645036	0.0462391	0.0923785	0.0278657	0.0840776	-0.0091214	-0.0158345	0.0161376	0.0820956	0.00870469	-0.0813953			0.0294914	0.011753
72	0.00163494	0.0258268	0.0137783	-0.0787542	0.0603482	0.0363246	0.129303	-0.0193779	0.137576	-0.0417278	0.00241683	0.0176439	0.0556808	0.00924238	-0.0654528			0.0189642	0.0157629
73	0.00103962	0.109982	0.0332831	-0.0564145	0.0112536	0.0674414	0.142448	0.0246667	0.109815	-0.0184758	0.0708194	-0.0047619	0.0387476	0.00823681	-0.0587728		360	0.0319539	0.0152922
74	-0.00894254	0.096798	0.0581655	0.0216076	0.024206	0.112419	0.173273	-0.0120872	0.0816351	-0.0568332	0.0942073	-0.0304147	-0.0224429	0.0434065	0.0468624			0.0414573	0.0162116
75	0.0937913	0.0562663	0.0348277	0.0423566	0.0447452	0.125706	0.132445	0.0283616	0.0849555	0.00341857	0.103979	-0.0178286	-0.059375	0.0486618	0.0434274			0.0510492	0.0134815
76	0.0828918	0.0911965	0.0246407	0.00281525	0.0306621	0.0798629	0.0700233	0.0014824	0.0430483	0.0219661	0.05462	-0.0465085	-0.0606249	0.100204	0.0440913			0.0360247	0.0122867
77	0.0513323	-0.000552608	-0.00370017	0.0132544	0.0450368	0.134012	0.0754213	0.0211953	0.0564905	-0.0232841	-0.0186984	-0.0441291	-0.0408036	0.118238	0.0604202			0.0296155	0.0139932
78	0.0300804	0.0295056	0.0447631	0.0330838	0.0328347	0.0454186	0.0388009	-0.0148521	0.00203827	-0.00904285	-0.0531839	-0.0535784	-0.00527439	0.119696	0.0468668			0.0191437	0.0112504
79	0.0594276	0.0646255	0.0269843	0.0899312	0.037581	0.0596195	0.0492132	0.00121581	-0.032983	-0.0195156	-0.0254587	-0.0768137	-0.0129364	0.126372	0.0867915			0.028937	0.0143163
80	0.0445522	0.0171794	-0.00763448	0.0215132	-0.0288761	0.0125614	-0.0246139	0.000378406	-0.0545394	0.0128924	-0.0678462	-0.0744161	0.0509302	0.0571707	0.0371752			-0.00023821	0.0108943
81	0.0635705	-0.0460917	0.0294785	-0.0767814	-0.0455056	-0.0378615	0.0999598	-0.0166215	-0.0377672	0.0070864	-0.0954288	-0.0544568	0.0651163	0.0613017	-0.00984424			-0.00625637	0.0150806
82	0.0367511	0.0225095	0.0354827	-0.0327524	-0.0424748	0.018209	0.0642546	0.0777106	-0.00345789	0.0273318	0.00388781	0.0514175	0.0368407	-0.0108784	-0.0400196			0.0163208	0.00950984
83	0.0445469	-0.0316267	0.0343836	-0.0255781	-0.0689535	-0.0669899	0.0509268	0.0368046	-0.00467862	0.0490644	0.0330871	-0.0172954	0.0117081	-0.0269523	0.0446714			0.0042079	0.0107854
84	0.0550085	-0.081111	0.0349684	-0.00841515	-0.0389438	0.131942	0.0505743	0.0882841	0.0216974	0.10066	0.0769922	0.0305785	0.0135084	-0.0213109	0.0467807			0.0334142	0.0144287
85	-0.0404095	-0.0952987	0.0295893	-0.0211154	-0.058022	0.0556889	0.00315246	0.0323012	0.0724939	0.114625	0.0890251	0.0432834	0.0333376	-0.0503173	0.00168634		420	0.0140013	0.0151902
86	-0.079905	-0.00662325	0.0177536	-0.0185755	-0.00814273	0.011193	-0.00748417	0.0455176	0.0698054	0.0825955	0.0853385	0.097858	-0.0222222	-0.0377402	0.0456406			0.0183339	0.0132595
87	-0.119335	0.0492593	-0.0208671	-0.000498753	-0.0127556	0.0116632	0.0380325	0.0242895	0.0589319	0.0213802	0.0418321	0.0265043	-0.030942	-0.0553446	0.0583942			0.00603626	0.0124794
88	-0.111904	-0.00261552	-0.0432605	0.045592	0.0105398	-0.109134	0.106075	-0.0818359	0.0327961	-0.0175643	-0.0522822	-0.0412371	0.0242843	-0.032994	0.0657289			-0.0138541	0.0162403
89	-0.152836	0.019413	-0.0222377	-0.00419513	0.0730316	-0.0759384	-0.0339122	-0.0771648	0.0261891	-0.0132118	-0.0105805	0.00110865	0.0451331	-0.0419034	-0.0216751			-0.019252	0.0141639
90	-0.153417	-0.00517823	-0.0106089	-0.0781471	0.038868	-0.198915	-0.0294901	-0.05776	0.0212366	-0.0528061	-0.0557719	-0.0163058	0.0257848	-0.0471987	-0.0229457			-0.0428437	0.016557
91	-0.141884	-0.0171261	-0.0136797	-0.0956624	0.0864209	-0.194634	0.0614227	-0.03529	-0.0323415	-0.0345745	-0.115787	-0.00362513	0.0121906	-0.0369928	-0.0353535			-0.0397944	0.0188738
92	-0.0780425	-0.0838982	-0.0016281	-0.0640145	0.0433539	-0.186699	0.0943542	-0.0124216	-0.0239651	-0.0425559	-0.134674	0.0340772	0.0215716	-0.0344374	-0.0150635			-0.0322695	0.0183828
93	-0.0927207	-0.109804	0.0304286	-0.0822106	0.0305141	-0.185678	0.015325	-0.00195575	-0.0484783	0.0190779	-0.125147	0.0221912	0.0480237	-0.10134	-0.0107015			-0.0394983	0.0185346
94	-0.0923477	-0.113746	0.0884103	-0.119824	-0.0124252	-0.0862672	-0.135287	-0.00199452	-0.041617	-0.0156435	-0.0884413	0.0362559	0.0101073	-0.0722323	-0.0263979			-0.0447633	0.0164196
95	-0.0627402	-0.151563	0.0492774	-0.0958113	-0.0903704	-0.170399	-0.0307736	0.0104679	-0.029338	-0.0880975	-0.103324	-0.0121816	0.00307579	-0.0163084	0.0291391			-0.0505964	0.0167539
96	-0.0897225	-0.0699673	0.0191142	-0.0654648	-0.101804	-0.162587	-0.111037	0.00971842	-0.0949854	-0.107056	-0.0920607	-0.0122283	-0.0384942	-0.0798023	0.050166			-0.0630808	0.0148974
97	-0.0787037	-0.0663564	-0.0810023	-0.0487425	-0.164762	-0.196612	-0.23892	-0.0486526	-0.0682932	-0.124885	-0.0678994	-0.013071	-0.108151	-0.11425	0.000124657		480	-0.0946785	0.0169198
98	-0.117363	-0.132581	-0.091788	-0.0843637	-0.177703	-0.209482	-0.177739	-0.0951276	-0.0356027	-0.090897	-0.0394653	-0.0805118	-0.106963	-0.120991	-0.0120424			-0.104841	0.0141277
99	-0.0813953	-0.0989301	-0.1303	-0.0632051	-0.181754	-0.217426	-0.201509	-0.0838947	-0.0472927	-0.176807	-0.00217755	-0.0673129	-0.233292	0.00691244	-0.0115385			-0.105995	0.0206391
100	-0.0973198	-0.0837135	-0.212638	-0.110775	-0.186059	-0.308022	-0.176653	-0.0668249	-0.0483999	-0.180556	-0.0360231	-0.083544	-0.255219	-0.074987	-0.0234163			-0.12961	0.0220043
101	-0.049742	-0.0883285	-0.247347	-0.11861	-0.181069	-0.327181	-0.150986	-0.0647778	-0.00516854	-0.0305388	-0.017083	-0.014574	-0.225929	-0.329817	-0.122616			-0.131585	0.0283646
102	-0.033273	-0.18209	-0.245997	-0.148994	-0.152634	-0.368284	-0.133319	-0.110563	-0.0114888	-0.0870155	-0.0389358	-0.0138927	-0.35514	-0.475097	-0.0942513			-0.163398	0.0362241
103	-0.0028715	-0.234437	-0.17045	-0.145816	-0.130824	-0.241636	-0.0987858	-0.0890797	-0.0332417	-0.098486	-0.0243902	-0.0861551	-0.343746	-0.353805	-0.170136			-0.148257	0.0275927
104	-0.0752812	-0.133548	-0.24394	-0.115909	-0.110526	-0.345768	-0.180168	0.051552	-0.0555491	-0.10483	-0.046057	-0.0376669	-0.449965	-0.45858	-0.185641			-0.166125	0.0386813
105	-0.192546	-0.156167	-0.239001	-0.107516	-0.170289	-0.389469	-0.157306	-0.0586898	-0.0464029	-0.115761	-0.0240054	-0.116967	-0.470598	-0.341365	-0.191756			-0.185189	0.0330343
106	-0.177717	-0.216496	-0.245349	-0.126053	-0.193163	-0.28069	-0.160297	-0.10601	-0.143791	-0.0780639	-0.0667663	-0.199884	-0.535744	-0.473425	-0.110045			-0.207566	0.0348984
107	-0.239454	-0.313396	-0.19154	-0.175653	-0.197356	-0.238291	-0.0220723	-0.0835446	-0.299187	-0.116159	-0.0829644	-0.272327	-0.511805	-0.420727	-0.12455			-0.219268	0.0340612
108	-0.209821	-0.28485	-0.24799	-0.186817	-0.213248	-0.188226	-0.118319	-0.124861	-0.243584	-0.0115626	-0.0732613	-0.293486	-0.493733	-0.312276	-0.297828			-0.219991	0.0298469
109	-0.211087	-0.246452	-0.262651	-0.198309	-0.194415	-0.258573	-0.47312	-0.261432	-0.182189	0.0808114	-0.0655	-0.269386	-0.501351	-0.355705	-0.124512		540	-0.234925	0.0373258
110	-0.25577	-0.197224	-0.205259	-0.249642	-0.26931	-0.170614	-0.389726	-0.354338	-0.131847	0.0726587	-0.103508	-0.351395	-0.406602	-0.102784	-0.187247			-0.220174	0.0329867

## Sheet: D
WT cycle 11 cap area in um^2 / caps	0	60	120	180	240	300	360	420	480	540			WT cycle 11 cap area (average)	SEM
	35.8237	233.351	235.421	187.53	203.306	215.211	232.894	236.764	187.181	147.245		0	37.2248	2.23801
	30.3144	179.656	208.788	200.806	227.627	236.388	237.866	229.105	210.239	121.285		60	189.709	13.7302
	52.0022	135.851	181.349	169.793	164.176	215.507	221.097	233.781	211.905	129.616		120	206.015	7.82294
	38.6455	116.743	191.024	180.704	204.031	223.972	214.862	229.239	197.205	135.044		180	193.672	5.31974
	48.2129	238.269	238.753	225.316	230.718	264.391	294.625	287.96	261.301	182.962		240	203.071	5.54695
	37.3556	260.602	267.939	234.991	243.053	237.571	264.149	295.485	191.185	107.498		300	216.705	5.84632
	38.8605	205.482	223.596	184.923	202.822	229.616	268.127	282.209	227.976	108.25		360	227.718	7.55651
	44.0742	229.213	196.856	190.325	217.173	219.135	221.043	228.46	209.675	141.064		420	236.809	7.68193
	39.1561	220.425	226.283	190.191	202.58	198.791	240.366	249.288	224.751	177.694		480	204.502	5.93583
	24.3483	194.437	172.185	191.803	198.388	189.895	194.168	212.201	179.28	174.684		540	133.903	8.80607
	43.1067	234.023	182.962	180.462	185.783	173.367	188.955	200.538	165.278	150.685
	44.4504	228.487	221.634	222.816	211.852	196.587	207.821	200.161	196.829	131.416
	24.7514	125.45	178.823	178.689	190.89	209.325	213.975	218.248	197.017	64.4719
	23.5421	87.2884	153.561	162.833	168.906	205.456	210.535	225.208	192.099	79.9785
	33.7275	156.356	211.045	203.897	194.76	235.367	205.294	223.488	215.614	156.651

## Sheet: E
Cap area change in different phases	Expansion	Stabilization	Elongation	Fragmentation		WT cyc11 size chane in different phases	Expansion	Stabilization	Elongation	Fragmentation
	7.03376	-0.271544	0.364714	-0.488038		average	5.81804	-0.0735346	0.259773	-0.441806
	7.13032	-0.0558249	0.0934949	-0.401012		SEM	0.323064	0.0245362	0.0470033	0.0402041
	3.46098	-0.0846648	0.414682	-0.459756
	4.77191	-0.097202	0.369492	-0.44413
	4.84225	-0.0298147	0.291291	-0.444547
	7.37698	-0.119661	0.327684	-0.684439
	5.38728	-0.159692	0.662848	-0.572164
	4.59878	-0.0689472	0.213045	-0.409368
	5.92176	-0.175939	0.271589	-0.216348
	7.25828	0.0965633	0.0872278	-0.165816
	4.54863	-0.111157	0.108712	-0.282058
	4.91959	0.000491582	-0.0809483	-0.406442
	7.13029	0.0356327	0.180415	-0.711136
	6.41895	0.0494398	0.439756	-0.594162
	6.47092	-0.110701	0.152589	-0.347669

## Sheet: F
Cap averae expansion rate in different phases	Expansion	Stabilization	Elongation	Fragmentation			WT cyc11 average expansion rate in different phases	Expansion	Stabilization	Elongation	Fragmentation
	1.87958	-0.9123	0.297531	-0.940401			average	1.48662	-0.228278	0.213483	-0.831952
	1.61598	-0.160889	0.084804	-0.688401			SEM	0.0689801	0.0744208	0.0376299	0.0966572
	1.11284	-0.203171	0.303622	-0.82422
	1.26754	-0.239004	0.273403	-0.778947
	1.61083	-0.0928066	0.293231	-1.00014
	2.07144	-0.439667	0.35331	-1.69578
	1.48254	-0.445758	0.51826	-1.2875
	1.37925	-0.18633	0.178686	-0.720857
	1.6758	-0.54394	0.230643	-0.404358
	1.32503	0.227537	0.0751291	-0.268745
	1.33017	-0.290603	0.0842068	-0.419242
	1.51502	0.00143331	-0.0787124	-0.628656
	1.31942	0.0838484	0.146556	-1.1802
	1.10933	0.0996148	0.309953	-1.04356
	1.60452	-0.322136	0.131625	-0.598268

## Sheet: G
Caps/Time(s)	0	60	120	180	240	300	360	420	480	540
	2016.42	2185.34	2261.77	2486.76	2099.64	2129.77	2151.72	2400.6	2143.24	1548.03
	1999.39	2466.39	2368.41	2073.16	2031.78	2111.38	2099.42	2290.92	2201.99	1735.36
	2256.01	2314.24	2588.51	2731.06	2403.4	2238.51	2327.25	2574.94	2397.41	1685.44
	2227.54	2385.81	2446.39	2600.64	2245.86	2217.76	2295.74	2406.69	2227.12	1641.39
	2424.63	2118.56	2312.41	2343.96	2274.61	2231.68	2119.57	2198.64	1893.14	1705.03
	2258.46	2142.66	2363.54	2347.48	2280.15	2240.13	2236.17	2004.54	1802.34	1872.12
	2522.35	2462.03	2641.23	2831.7	2572.36	2493.62	2572.42	2319.27	2026.47	1984.19
	1769.07	2920.57	3381.74	3309.52	2716.42	2366.47	2231.78	1282.62	1921.41	1680.01
	1636.92	2827.85	3392.31	3249.91	2841.13	2498.48	2244.1	1195.94	1946.32	1764.79
	1724.37	2845.74	3460.24	3589.81	2966.78	2424.49	2307.78	1157.38	1996.57	1730.95
	1642.12	2817.98	3139.74	3124.87	2918.57	2487.84	2287.08	3221.61	2083.44	1685.45
	1857.14	3019.09	3369.91	3186.45	2685.88	2423.85	2054.8	2939.23	1889.79	1952.27
	1057.49	999.388	1393.29	1420.07	1424.22	1325.76	1222.49	3177.51	1076.47	894.095
	1071.17	1006.51	1235.92	1286.89	1432.27	1348.46	1219.16	3207.81	1062.24	880.85
	977.787	940.577	1224.27	1256.49	1335.44	1231.52	1145.76	3144.23	998.811	824.171
Time	Cap intensity (average)	SEM
0	2027.87	88.6705
60	2542.19	94.3652
120	2810.52	142.042
180	2822.94	135.374
240	2503.05	93.2797
300	2322	41.2828
360	2243.99	39.3414
420	2166.03	190.639
480	2044.1	49.7619
540	1748.75	36.8543

## Sheet: H
Cap	180626-B1				180716-A1			180904-A1					180911-A1				Time point	Time (s)	WT cap heterogeity (average)	SEM
1	1	1	1	1	1	1	1	1	1	1	1	1	1	1	1		1	0	1	0
2	1.03738	1.09873	0.983961	0.920873	0.956252	1.03581	1.00504	1.23794	1.21932	1.34589	1.35396	1.44668	1.05392	1.04581	1.04066		2		1.11882	0.041688
3	1.03045	1.13578	1.03038	0.910886	0.986048	1.00216	0.98824	1.59367	1.42785	1.49577	1.83488	2.03608	1.0118	1.00986	0.981001		3		1.23166	0.0919617
4	1.08329	1.14572	1.04161	0.953467	1.01757	1.15679	1.10785	1.60088	1.43209	1.48795	1.88356	2.11201	0.929635	0.965241	0.929549		4		1.25648	0.0950207
5	1.12227	1.126	1.12167	1.00436	1.09004	1.14745	1.11575	1.453	1.44339	1.53602	1.85065	2.11057	0.947457	0.976602	0.933051		5		1.26522	0.0896465
6	1.1189	1.15614	1.28177	0.969547	1.1177	1.16337	1.10628	1.58273	1.50355	1.53209	1.88165	2.03111	0.989709	1.06986	1.00211		6		1.30044	0.0855931
7	1.0484	1.17236	1.21989	0.96483	1.16129	1.14685	1.1594	1.69997	1.57495	1.5923	2.04896	1.8888	0.977063	1.03689	0.99056		7		1.31217	0.0914569
8	1.11155	1.15874	1.25531	1.01183	1.18061	1.17611	1.11846	1.68603	1.68012	1.66954	2.09387	1.92377	0.991729	1.06961	1.01466		8		1.3428	0.0939731
9	1.07979	1.21839	1.27564	1.04208	1.21768	1.23233	1.18814	1.76474	1.75504	1.71622	1.95419	1.96846	1.05507	1.07525	1.05038		9		1.37289	0.0902466
10	1.20616	1.22446	1.36568	1.04819	1.14968	1.22774	1.19356	1.79668	1.73825	1.79852	2.01252	2.00356	1.0966	1.10935	1.09748		10		1.40456	0.0917057
11	1.24124	1.29714	1.37764	1.08209	1.16778	1.24865	1.21604	1.85212	1.82976	1.91708	2.10053	2.07385	1.11923	1.10497	1.10956		11		1.44918	0.0991217
12	1.28133	1.31838	1.3621	1.12368	1.18954	1.30482	1.2011	2.09027	1.87683	2.15183	2.19608	2.20607	1.08344	1.12426	1.07694		12		1.50578	0.116635
13	1.21119	1.38124	1.30997	1.0936	1.17927	1.30953	1.27381	2.24036	1.99801	2.24177	2.19399	2.31464	1.07009	1.18764	1.09529		13	60	1.54003	0.127296
14	1.23022	1.41066	1.28357	1.13363	1.14629	1.31522	1.25663	2.25593	2.11107	2.29073	2.28227	2.33405	1.07407	1.22238	1.1405		14		1.56581	0.132391
15	1.29407	1.42883	1.33649	1.15919	1.14742	1.31954	1.31213	2.31463	2.21291	2.34552	2.35535	2.4418	1.06266	1.23015	1.13258		15		1.60622	0.14003
16	1.29974	1.39776	1.3889	1.22739	1.13716	1.334	1.34975	2.3723	2.31931	2.462	2.40978	2.47456	1.06461	1.23315	1.12955		16		1.64	0.147327
17	1.3074	1.45905	1.37869	1.21672	1.13731	1.28253	1.25691	2.52667	2.23412	2.60744	2.59453	2.58586	1.12043	1.28001	1.19085		17		1.67857	0.160028
18	1.32375	1.56682	1.35587	1.21778	1.11878	1.33336	1.3108	2.51298	2.27485	2.58035	2.57106	2.54393	1.18656	1.42651	1.32025		18		1.70958	0.152012
19	1.31602	1.65557	1.41638	1.2832	1.20075	1.36202	1.36385	2.6517	2.3155	2.62919	2.55562	2.58766	1.2701	1.41678	1.34523		19		1.75797	0.152574
20	1.22441	1.72029	1.36119	1.31406	1.19634	1.416	1.34736	2.7274	2.43836	2.72201	2.65261	2.55898	1.34193	1.53699	1.4738		20		1.80212	0.158702
21	1.29066	1.74874	1.27917	1.26558	1.2125	1.43609	1.3717	2.73831	2.51835	2.80864	2.63835	2.69032	1.39485	1.53321	1.57826		21		1.83365	0.164125
22	1.32587	1.78152	1.40201	1.31831	1.24567	1.49848	1.40812	2.80699	2.7778	2.99806	2.67785	2.60131	1.44575	1.59678	1.64111		22		1.90171	0.169346
23	1.37009	1.84232	1.42931	1.34012	1.2952	1.54185	1.47672	2.93407	2.84106	3.03063	2.6753	2.64213	1.50513	1.5512	1.63914		23		1.94095	0.171796
24	1.46537	1.82339	1.4205	1.37117	1.2951	1.50124	1.54476	2.97747	2.86985	3.07935	2.84922	2.6161	1.54283	1.59255	1.67955		24		1.97523	0.175221
25	1.44972	1.78218	1.48356	1.4604	1.34203	1.6229	1.59103	3.06054	2.92467	3.20267	2.79989	2.63954	1.58049	1.62971	1.70771		25	120	2.01847	0.176189
26	1.53556	1.81012	1.50478	1.44483	1.30812	1.64467	1.57732	3.17344	2.89335	3.137	3.07669	2.76498	1.61459	1.6131	1.61403		26		2.0475	0.185349
27	1.55311	1.78791	1.60894	1.47319	1.27867	1.67821	1.55087	3.21474	2.80831	3.14829	3.06351	2.84902	1.71155	1.68274	1.79248		27		2.0801	0.18167
28	1.55072	1.77849	1.58969	1.4402	1.33865	1.63826	1.59067	3.24015	2.89526	3.04638	3.07097	2.96488	1.74455	1.66924	1.74297		28		2.08674	0.183986
29	1.53479	1.77807	1.57707	1.45071	1.38929	1.59228	1.58553	3.19911	2.86632	3.16722	3.19013	3.13495	1.88654	1.82482	1.85784		29		2.13565	0.188986
30	1.61528	1.82595	1.56327	1.45174	1.48677	1.45807	1.64652	3.17193	2.75178	2.91162	3.06887	3.16773	1.78855	1.68766	1.75103		30		2.08979	0.178762
31	1.72523	1.83154	1.60238	1.47045	1.49724	1.53923	1.66266	3.19493	2.62399	2.81749	3.07554	3.14827	1.79443	1.68662	1.706		31		2.09173	0.171586
32	1.74977	1.83556	1.65088	1.46715	1.46881	1.51782	1.66899	3.22161	2.57481	2.86735	3.0335	2.98808	1.6483	1.66065	1.56453		32		2.06119	0.170594
33	1.80896	1.72826	1.68283	1.49084	1.38998	1.47491	1.58899	3.09033	2.4284	2.7737	2.82535	2.90843	1.71458	1.75062	1.60174		33		2.01719	0.15526
34	1.85754	1.6458	1.71597	1.46994	1.45185	1.4844	1.70685	2.95767	2.48007	2.85116	2.87821	2.87538	1.64319	1.66315	1.55163		34		2.01552	0.154418
35	1.81764	1.42204	1.75146	1.52119	1.45976	1.48715	1.71508	2.91929	2.40017	2.82473	2.83368	2.78763	1.50078	1.55142	1.41522		35		1.96048	0.15529
36	1.85226	1.33198	1.79473	1.54897	1.42777	1.43378	1.64181	2.85289	2.3349	2.86067	2.77191	2.80841	1.59672	1.62742	1.50957		36		1.95959	0.15177
37	1.72808	1.29203	1.88332	1.57259	1.47289	1.43492	1.65071	2.78089	2.31365	2.88847	2.69819	2.80613	1.62581	1.6857	1.59532		37	180	1.96191	0.146487
38	1.63569	1.23814	1.89784	1.52089	1.47645	1.50557	1.62804	2.67074	2.25954	2.81885	2.63955	2.74946	1.64417	1.62905	1.53904		38		1.92353	0.140704
39	1.48672	1.23582	1.77737	1.47714	1.4209	1.56942	1.58798	2.64152	2.15963	2.76335	2.56913	2.82862	1.58387	1.63667	1.55546		39		1.88624	0.141418
40	1.4393	1.26665	1.61677	1.33824	1.41646	1.48229	1.58928	2.59287	2.2251	2.71537	2.50095	2.84248	1.56066	1.6763	1.54115		40		1.85359	0.142689
41	1.44207	1.22905	1.55766	1.23093	1.42325	1.43504	1.52298	2.47233	2.14024	2.67967	2.42715	2.73711	1.51552	1.64323	1.42546		41		1.79211	0.138813
42	1.33952	1.27423	1.53477	1.20833	1.45677	1.48518	1.47885	2.35407	2.11383	2.51458	2.31235	2.47708	1.53314	1.65236	1.52408		42		1.75061	0.119494
43	1.32818	1.31898	1.42711	1.12463	1.42246	1.42179	1.40592	2.50006	2.13758	2.55612	2.48239	2.61301	1.51935	1.58058	1.4482		43		1.75242	0.138171
44	1.31943	1.31438	1.36831	1.08631	1.35666	1.38306	1.39729	2.49264	2.10013	2.4858	2.45783	2.59655	1.51654	1.61936	1.48659		44		1.73206	0.13705
45	1.38922	1.31386	1.38999	1.17154	1.38788	1.34889	1.36858	2.47169	2.0421	2.36863	2.52304	2.64318	1.54726	1.59982	1.54732		45		1.74087	0.132913
46	1.3659	1.18705	1.43929	1.21924	1.41968	1.30754	1.30194	2.50245	2.01247	2.33721	2.23923	2.38656	1.49073	1.50674	1.55305		46		1.68461	0.120984
47	1.41185	1.17774	1.3808	1.1424	1.4396	1.28275	1.33415	2.57877	2.01079	2.29281	2.24749	2.35576	1.52055	1.50388	1.49922		47		1.67857	0.123413
48	1.33017	1.24076	1.42039	1.1764	1.41817	1.30563	1.33048	2.52341	1.94544	2.16711	2.1109	2.23675	1.41425	1.43789	1.45315		48		1.63406	0.11193
49	1.32335	1.29084	1.38036	1.14615	1.37163	1.34129	1.2801	2.31406	1.88189	2.03842	1.96429	2.07847	1.35913	1.42265	1.44468		49	240	1.57582	0.0950134
50	1.18157	1.26	1.3372	1.06672	1.36052	1.36097	1.31311	2.09109	1.8298	2.02902	1.92765	1.96294	1.37679	1.40412	1.47338		50		1.53166	0.0870745
51	1.2473	1.29361	1.20379	0.980473	1.35335	1.31776	1.28764	2.10555	1.92205	2.04378	2.02582	2.00514	1.35815	1.43469	1.52339		51		1.54017	0.0960364
52	1.28416	1.27277	1.19944	0.952451	1.30241	1.28026	1.28435	2.03249	1.86052	2.0083	1.97125	1.91155	1.32155	1.40899	1.45618		52		1.50311	0.0906966
53	1.35272	1.24269	1.24134	0.964198	1.34444	1.27564	1.22552	1.92061	1.86623	1.91394	1.92498	1.84527	1.28163	1.39172	1.37657		53		1.47783	0.0828437
54	1.34688	1.26599	1.28315	1.0206	1.2954	1.23358	1.22781	2.0319	1.86271	1.99301	1.9462	1.91413	1.3013	1.39486	1.44373		54		1.50408	0.0879276
55	1.34939	1.26662	1.28773	1.04204	1.28256	1.20355	1.17612	2.01883	1.86192	1.94413	1.91581	1.94934	1.32912	1.38638	1.42304		55		1.49577	0.0870684
56	1.26018	1.27645	1.22818	1.03851	1.27608	1.21166	1.11077	2.06447	1.90494	1.93889	1.95531	2.04963	1.30825	1.29547	1.32386		56		1.48284	0.0968296
57	1.17374	1.24715	1.22386	1.04786	1.2034	1.17398	1.05852	1.77758	1.90928	1.95575	1.82473	1.85392	1.33926	1.34034	1.36167		57		1.43274	0.0852393
58	1.17002	1.28136	1.21217	1.03804	1.21424	1.18595	1.05722	1.79854	1.83176	1.92492	1.77055	1.84117	1.36416	1.34614	1.40352		58		1.42932	0.0809211
59	1.19308	1.27968	1.19355	1.00868	1.18387	1.14386	1.09272	1.89688	1.91144	1.96401	1.85378	1.98105	1.36381	1.36656	1.41772		59		1.45671	0.0921796
60	1.1467	1.28251	1.17034	1.05312	1.2508	1.15607	1.12698	1.83176	1.95504	1.93961	1.85681	1.9509	1.40193	1.32161	1.42011		60		1.45762	0.0889599
61	1.17932	1.2989	1.16228	1.04187	1.24998	1.14802	1.18694	1.73945	1.93574	1.82375	1.72065	1.82817	1.3993	1.33011	1.40024		61	300	1.42965	0.0766793
62	1.19151	1.31982	1.15752	1.04543	1.26844	1.13075	1.1557	1.67721	1.93003	1.79799	1.65497	1.76371	1.3597	1.31837	1.44553		62		1.41445	0.0725255
63	1.22604	1.34581	1.20067	1.09036	1.22307	1.13366	1.16117	1.65487	1.89126	1.77323	1.65228	1.7075	1.3864	1.28831	1.48989		63		1.41497	0.0672333
64	1.20957	1.34167	1.18165	1.10294	1.22302	1.09907	1.18729	1.70518	1.9155	1.99798	1.8444	1.94879	1.32857	1.22709	1.39743		64		1.44734	0.086167
65	1.22342	1.29917	1.21181	1.08252	1.16992	1.11219	1.21896	1.86703	1.9274	2.059	1.96909	2.15587	1.26556	1.24836	1.42135		65		1.48211	0.100291
66	1.26856	1.33725	1.25826	1.10797	1.19253	1.0526	1.17731	1.8697	1.84728	1.98204	1.80379	2.02081	1.3102	1.28045	1.49438		66		1.46688	0.0876139
67	1.27055	1.30156	1.30054	1.15106	1.16945	1.05972	1.25087	1.8097	1.83552	1.83322	1.71625	1.99827	1.31674	1.28778	1.56596		67		1.45781	0.0783639
68	1.26682	1.27653	1.30687	1.18989	1.17016	1.0389	1.27537	1.74837	1.79989	1.88223	1.69953	1.94869	1.31473	1.27272	1.49318		68		1.44559	0.0752815
69	1.17721	1.28994	1.34085	1.22024	1.12286	1.131	1.22454	1.64741	1.77582	1.75897	1.64126	1.95145	1.29617	1.28719	1.43868		69		1.42024	0.0686603
70	1.20565	1.31271	1.25292	1.18138	1.13762	1.135	1.34523	1.74754	1.78882	1.81735	1.66206	2.01549	1.31513	1.27349	1.4348		70		1.44168	0.0739659
71	1.16764	1.31414	1.27056	1.19559	1.12133	1.20947	1.32584	1.73835	1.72264	1.81477	1.68182	1.99902	1.35029	1.26712	1.40222		71		1.43872	0.0712429
72	1.12563	1.31531	1.22841	1.14671	1.20201	1.18297	1.3909	1.70846	1.58946	1.74255	1.62213	1.8558	1.37968	1.25641	1.48192		72		1.41522	0.0614186
73	1.16071	1.31674	1.17035	1.15219	1.2049	1.22413	1.40588	1.77463	1.52625	1.76684	1.63677	1.82572	1.40351	1.24877	1.40178		73	360	1.41461	0.0615362
74	1.1738	1.36418	1.16824	1.14723	1.27623	1.25247	1.43352	1.81758	1.51486	1.79414	1.73478	1.92519	1.40319	1.29158	1.46461		74		1.45077	0.0660574
75	1.20967	1.36752	1.22373	1.20685	1.29585	1.23232	1.35176	1.99016	1.59123	1.93058	1.92169	2.06084	1.36653	1.3008	1.44963		75		1.49994	0.0812338
76	1.23067	1.33299	1.18474	1.18906	1.30868	1.24106	1.3153	2.03492	1.65396	2.06788	2.00052	2.06555	1.35956	1.35582	1.44017		76		1.51873	0.089331
77	1.23585	1.30967	1.23746	1.18696	1.30492	1.33836	1.29073	2.08112	1.69453	2.00182	1.98217	2.01731	1.38742	1.37787	1.44109		77		1.52582	0.0853403
78	1.2623	1.33036	1.22826	1.16277	1.27701	1.3555	1.35311	2.04165	1.80036	1.9625	2.03756	1.99703	1.40104	1.35634	1.42449		78		1.53269	0.0850393
79	1.31361	1.40156	1.21806	1.1804	1.29908	1.25337	1.36305	1.82369	1.75134	1.83546	1.78897	1.71752	1.40171	1.39901	1.44763		79		1.47963	0.0606981
80	1.3291	1.42377	1.24991	1.22071	1.37631	1.258	1.28413	1.8591	1.8874	2.02078	1.82057	1.86342	1.41397	1.39258	1.43588		80		1.52238	0.0722644
81	1.33732	1.47991	1.27884	1.272	1.40915	1.21693	1.26895	1.86045	1.96889	2.08946	1.89967	1.91713	1.41768	1.40032	1.50796		81		1.55498	0.0778261
82	1.33049	1.51686	1.30156	1.30083	1.37588	1.23101	1.25212	1.98565	1.91873	2.20312	2.45905	2.65383	1.40993	1.36765	1.41394		82		1.64804	0.121855
83	1.37	1.53408	1.30216	1.32593	1.34255	1.17298	1.22556	2.08099	2.08216	2.34346	2.47578	2.50295	1.34966	1.35438	1.41387		83		1.65843	0.125645
84	1.34531	1.51231	1.31624	1.30697	1.30117	1.16094	1.19422	1.99419	2.0558	2.23396	2.57054	2.50908	1.39043	1.35042	1.42754		84		1.64461	0.125834
85	1.35172	1.47591	1.34106	1.29294	1.28262	1.18393	1.1508	1.96416	2.0783	2.26176	2.65089	2.41704	1.39416	1.36669	1.40885		85	420	1.64139	0.127109
86	1.37468	1.5029	1.35203	1.29489	1.2419	1.19553	1.16049	2.05872	2.16872	2.37472	2.64075	2.36514	1.36791	1.35687	1.3655		86		1.65472	0.131393
87	1.38703	1.5078	1.33777	1.26305	1.19703	1.19111	1.19823	2.11646	2.20536	2.40696	2.55721	2.19952	1.36941	1.35192	1.39799		87		1.64579	0.127452
88	1.40577	1.45043	1.36295	1.22547	1.20236	1.12541	1.18775	2.02499	2.09864	2.36463	2.46129	2.08393	1.36168	1.33844	1.3848		88		1.60523	0.118942
89	1.37746	1.4276	1.3601	1.20485	1.23229	1.1748	1.16081	2.02523	2.06106	2.20418	2.38952	1.98436	1.40656	1.34716	1.43444		89		1.58603	0.10817
90	1.36699	1.43248	1.35261	1.21778	1.22558	1.11946	1.18926	1.98708	1.97677	2.13652	2.36561	1.96452	1.3921	1.31959	1.44842		90		1.56632	0.103647
91	1.33275	1.42889	1.34255	1.21119	1.17542	1.16415	1.16902	1.9497	1.90711	2.12131	2.31886	1.93076	1.37126	1.31621	1.42512		91		1.54429	0.100132
92	1.33862	1.4941	1.3732	1.28081	1.19552	1.08104	1.18517	1.78153	1.8275	1.9665	2.20398	1.95556	1.32336	1.31857	1.40047		92		1.51506	0.0882482
93	1.30605	1.44311	1.41634	1.27243	1.16142	1.04721	1.12867	1.70189	1.78291	1.89897	2.09753	1.88746	1.28491	1.27018	1.38987		93		1.4726	0.0829306
94	1.28739	1.44708	1.41982	1.28083	1.17199	1.02432	1.0887	1.68657	1.77935	1.86079	1.97003	1.83826	1.25294	1.27447	1.35726		94		1.44932	0.0779995
95	1.28446	1.40369	1.40741	1.25207	1.1404	0.993553	1.04958	1.62307	1.72355	1.74858	1.90164	1.76185	1.20845	1.23287	1.30946		95		1.40271	0.0730922
96	1.28242	1.39984	1.3832	1.23153	1.11722	1.0017	1.02845	1.62586	1.70843	1.69573	1.80661	1.70803	1.15652	1.20923	1.24408		96		1.35022	0.0707415
97	1.25681	1.36109	1.29823	1.21949	1.08623	1.00784	1.01997	1.60349	1.69331	1.62654	1.68744	1.66551	1.11555	1.16311	1.20364		97	480	1.31298	0.0667842
98	1.23478	1.32689	1.27892	1.26688	1.05028	0.954541	1.00803	1.53304	1.70626	1.55734	1.64727	1.61076	1.12256	1.18918	1.29923		98		1.31906	0.0622794
99	1.2324	1.30781	1.25562	1.26473	1.02902	0.924505	0.990528	1.53635	1.6605	1.49632	1.50951	1.64367	1.08472	1.18768	1.27011		99		1.2929	0.0602972
100	1.1995	1.31663	1.24096	1.25358	1.01355	0.920594	1.03615	1.58893	1.62795	1.4353	1.5327	1.64499	1.10112	1.1623	1.20907		100		1.28556	0.060071
101	1.21498	1.31584	1.20604	1.23143	0.99405	0.893436	1.00086	1.61385	1.61852	1.37428	1.55589	1.71162	1.0526	1.15156	1.13366		101		1.27124	0.0657661
102	1.21058	1.30707	1.19189	1.21447	0.984205	0.906042	0.94993	1.53657	1.53473	1.30672	1.48731	1.57858	1.05397	1.15128	1.17461		102		1.2392	0.0565369
103	1.14492	1.21806	1.17443	1.20456	0.985334	0.918694	0.955485	1.40767	1.44659	1.24266	1.48384	1.53018	1.07087	1.1274	1.14426		103		1.20366	0.0492433
104	1.09459	1.17421	1.17948	1.12733	0.952449	0.909051	0.963153	1.43424	1.41193	1.1986	1.48353	1.48752	1.03964	1.05937	1.07785		104		1.17286	0.0503187
105	1.0548	1.13189	1.09597	1.08734	0.968233	0.926482	0.950621	1.33356	1.39168	1.14546	1.34087	1.3968	1.03042	1.08347	1.02164		105		1.13062	0.0412898
106	1.04173	1.09972	1.07296	1.03837	0.954836	0.880768	0.944021	1.2663	1.34818	1.15049	1.19946	1.32473	0.964323	1.05902	0.977035		106		1.08813	0.0369475
107	0.998551	1.07008	1.02214	0.975543	0.947512	0.937468	0.942537	1.20001	1.30467	1.09864	1.18465	1.25266	0.991311	1.02484	0.972701		107		1.06155	0.0309423
108	0.929155	1.11775	0.976758	0.906597	0.964825	0.939713	0.975948	1.13371	1.26116	1.09224	1.1861	1.18059	0.974401	1.03088	0.964578		108		1.04229	0.0285747
109	0.886856	1.07665	0.982659	0.918957	0.942696	1.03288	1.0509	1.06742	1.21765	1.08583	1.26492	1.10852	0.938117	0.98134	0.953036		109	540	1.03389	0.0278512
110	0.869394	1.05821	0.972146	0.879705	0.928814	1.02122	1.08194	1.00113	1.17414	1.07943	1.31209	1.03645	0.970176	1.02252	0.955829		110		1.02421	0.0291008

## Sheet: I
Time (s) / cap heterogeniety (intensity standard deviation)	cap1	cap2	cap3	cap4	cap5	cap6	cap7	cap8	cap9	cap10	cap11	cap12	cap13	cap14	cap15
0	358.974	340.801	356.616	387.733	406.505	401.624	434.454	362.677	352.031	336.003	344.849	362.375	242.849	222.808	216.609
60	434.785	470.728	467.157	424.026	479.38	525.937	553.411	812.528	703.362	753.241	756.595	838.766	259.871	264.615	237.249
120	520.413	607.37	529.06	566.244	545.544	651.794	691.231	1109.99	1029.57	1076.11	965.539	956.502	383.82	363.113	369.905
180	620.336	440.326	671.623	609.744	598.737	576.298	717.157	1008.57	814.475	970.534	930.467	1016.87	394.825	375.587	345.561
240	475.05	439.919	492.257	444.4	557.574	538.693	556.146	839.255	662.483	684.916	677.386	753.187	330.064	316.978	312.93
300	423.345	442.665	414.488	403.967	508.124	461.073	515.669	630.857	681.44	612.785	593.366	662.484	339.818	296.359	303.304
360	416.665	448.748	417.367	446.742	489.798	491.639	610.79	643.616	537.286	593.664	564.439	661.597	340.84	278.236	303.637
420	485.231	502.992	478.244	501.314	521.393	475.493	499.969	712.356	731.626	759.959	914.159	875.875	338.57	304.509	305.168
480	451.161	463.862	462.969	472.835	441.56	404.773	443.131	581.547	596.098	603.618	581.911	603.54	270.91	259.151	260.718
540	318.359	366.922	350.432	356.31	383.211	414.828	456.566	420.769	489.876	551.696	436.208	364.148	227.82	218.65	206.436
Time (s)	cap heterogeneity (average)	SEM
0	341.794	16.8475
60	532.11	51.9302
120	691.08	68.6572
180	672.74	60.0183
240	538.749	41.4875
300	485.983	32.9702
360	483.004	30.9743
420	560.457	50.1571
480	459.852	31.5578
540	370.815	25.5575

## Sheet: F1S1B (2)
Cap area
	moemCh		Act88F
0	37.2248	2.23801	34.7326	2.33276
120	206.015	7.82294	211.658	7.88196
180	193.672	5.31974	183.499	7.14174
420	236.809	7.68193	211.54	11.9118
540	133.903	8.80607	141.516	7.08636

## Sheet: F1S1C (2)
Area change
moemCh	Act88F
7.03376	8.72033
7.13032	8.01043
3.46098	4.43343
4.77191	4.6587
4.84225	8.38655
7.37698	6.58803
5.38728	6.49325
4.59878	5.37071
5.92176	5.88902
7.25828
4.54863
4.91959
7.13029
6.41895
6.47092

[truncated: 2 more sheets: F1S1E,F, F1S2B,C,D]
