# Supplementary material for: Combinatorial deployment of F-actin regulators to build complex 3D actin structures in vivo
Source: eLife. 2021 May 5;10:e63046. doi: 10.7554/eLife.63046 (PMC8149123; doi:10.7554/eLife.63046)
Supplement: Figure 2—source data 1. [file elife-63046-fig2-data1.xlsx]

## Sheet: C
Time point	Time(s)	Dia shRNA cap size change (average)	SEM	ArpC4 shRNA cycle 11 cap size change (average)	SEM	WT cycle 11 cap size change (average)	SEM		Dia shRNA cap area change												ArpC4 shRNA cap area change
1	0	1	0	1	0	1	0		Time points	0829-A1-1	0829-A1-2	0829-A1-3	0829-A1-4	0829-B1-1	0829-B1-2	0829-B1-3	0925-A1-1	0925-A1-2	0925-A1-3		Time points	171121_1	171121_2	121121_3	180618_1	180618_2	180618_3	171207_4	180716_1	180716_2	180716_3	180716_4
2		1.35502	0.0923675	1.16135	0.040521	1.49023	0.107816		1	1	1	1	1	1	1	1	1	1	1		1	1	1	1	1	1	1	1	1	1	1	1
3		1.60422	0.0975035	1.2231	0.0401774	1.98118	0.175464		2	1.73518	1.68923	1.5988	1.64034	1.17197	1.29761	0.955364	1.32935	1.00805	1.12432		2	1.36655	1.15924	1.09016	1.03005	1.19787	1.10985	1.19379	1.04342	0.959599	1.2378	1.38652
4		1.90518	0.164183	1.28818	0.0393324	2.38003	0.198465		3	1.82648	1.92243	1.85502	2.06657	1.49003	1.52126	1.38373	1.61467	1.15443	1.20756		3	1.40885	1.13671	1.27146	1.05269	1.2535	1.05821	1.17099	1.19174	1.1187	1.36429	1.427
5		2.19737	0.136414	1.34053	0.0323431	2.82835	0.204702		4	2.57234	2.36107	2.0249	2.7839	1.46577	1.85323	1.66883	1.67228	1.2661	1.38335		4	1.42586	1.14439	1.45178	1.1534	1.26749	1.09891	1.23978	1.29125	1.22675	1.43214	1.4382
6		2.6103	0.202498	1.34519	0.0293141	3.22998	0.209812		5	2.63161	2.54725	2.34378	2.92598	1.85876	2.26267	1.86825	2.18913	1.54175	1.80449		5	1.45309	1.27599	1.3621	1.24551	1.32378	1.18512	1.44536	1.34968	1.21547	1.35595	1.53381
7		2.86613	0.217387	1.40981	0.0312239	3.56259	0.223288		6	3.33316	3.15797	2.33655	3.7228	2.46092	2.89517	2.25774	2.12283	1.68058	2.13527		6	1.51288	1.34306	1.3351	1.21194	1.34777	1.28184	1.32429	1.33091	1.20232	1.45268	1.45435
8		3.04548	0.200933	1.48969	0.0641488	3.93918	0.280741		7	4.00694	3.18947	2.41325	4.01341	2.82695	2.83634	2.51692	2.54402	1.94266	2.3713		7	1.47642	1.41372	1.62006	1.3993	1.33544	1.24289	1.43671	1.40366	1.26809	1.45446	1.45715
9		3.26175	0.236806	1.52137	0.0570367	4.41407	0.35367		8	3.97277	4.02398	2.61365	3.64878	3.01402	3.14735	2.54788	2.64946	2.23994	2.59693		8	1.88089	1.7619	1.64754	1.39774	1.51865	1.16324	1.31525	1.42666	1.27341	1.54137	1.45995
10		3.35131	0.264336	1.50017	0.052644	4.70617	0.346966		9	4.35718	4.4772	2.67791	3.79235	3.45283	3.24752	2.45716	3.05815	2.59608	2.5011		9	2.01556	1.62314	1.5675	1.42037	1.38408	1.45689	1.5283	1.44497	1.27873	1.54524	1.47028
11		3.3454	0.184307	1.52993	0.0556586	4.92877	0.356016		10	4.99893	4.43724	2.71365	3.96175	3.10728	3.28305	2.51836	2.99076	2.69266	2.80942		10	1.96354	1.53405	1.43057	1.54957	1.38308	1.49453	1.33608	1.38418	1.34826	1.56637	1.51163
12		3.47463	0.195907	1.53494	0.0490887	5.07671	0.348609		11	4.36893	4.02492	2.75783	3.45206	3.3779	3.78101	2.48236	3.09293	3.17354	2.9425		11	1.93972	1.42038	1.65815	1.65652	1.49134	1.4919	1.22484	1.45365	1.38992	1.60625	1.49655
13	60	3.63868	0.200271	1.58213	0.0452273	5.20509	0.361806		12	4.59263	4.27645	2.8008	3.53353	3.44313	3.8346	2.73578	3.34946	3.33048	2.8494		12	1.86631	1.5914	1.40743	1.54333	1.72019	1.6372	1.29638	1.48838	1.38647	1.50774	1.43949
14		3.61423	0.18946	1.59666	0.049942	5.34171	0.359316		13	4.70529	4.4457	3.02249	3.59016	3.70674	3.73267	2.59539	3.44511	3.95272	3.19058		13	1.9402	1.62212	1.56943	1.60226	1.56629	1.72998	1.53616	1.38817	1.44723	1.52679	1.47481
15		3.69282	0.172675	1.60278	0.0480586	5.35807	0.346885		14	4.75974	3.80583	2.96024	3.57377	3.93369	3.60862	2.67099	3.45109	4.14889	3.22946		14	1.93243	1.59549	1.53761	1.77752	1.6529	1.62538	1.5055	1.30627	1.48011	1.65952	1.49053
16		3.77975	0.165777	1.62939	0.0644907	5.42648	0.331385		15	4.64923	4.12318	2.95703	3.54148	3.78868	3.65929	2.89777	3.61413	4.25	3.44743		15	1.86825	1.59089	1.61668	1.59094	1.66089	1.8267	1.66116	1.28866	1.53461	1.49821	1.49354
17		3.77788	0.155558	1.61373	0.0586502	5.55249	0.318779		16	4.41431	4.31641	2.951	3.43368	3.96442	3.58358	3.38733	3.91902	4.50302	3.32475		16	1.90715	1.61546	1.80424	1.6975	1.71386	1.94792	1.66195	1.3288	1.35453	1.47798	1.41387
18		3.7492	0.161504	1.58911	0.0565415	5.56387	0.340364		17	3.95622	4.42454	2.90281	3.54993	3.98059	3.51427	3.53852	3.83859	4.58652	3.48686		17	1.87312	1.56631	1.82257	1.70101	1.6449	1.85908	1.63011	1.25604	1.50235	1.46726	1.42829
19		3.9181	0.163965	1.587	0.0668285	5.70988	0.349869		18	3.98505	3.79455	2.89036	3.63686	4.10404	3.82062	3.34773	3.82065	4.77616	3.31599		18	1.842	1.56221	1.87801	1.67252	1.503	1.76236	1.62579	1.2652	1.45913	1.45565	1.45435
20		3.9472	0.165386	1.60979	0.0673566	5.78849	0.341576		19	4.27015	3.93747	2.91325	3.9384	3.85768	4.11823	4.0432	3.91522	4.85664	3.33078		19	1.74964	1.55914	2.00241	1.72717	1.45803	1.76805	1.68003	1.24055	1.36862	1.52024	1.38307
21		3.77062	0.165983	1.60428	0.0716772	5.75058	0.315134		20	4.28991	4.07099	3.01406	3.93443	4.18491	4.14677	4.20734	3.5837	4.77867	3.26123		20	1.75401	1.66871	1.96528	1.69321	1.45137	1.87834	1.67964	1.17836	1.45694	1.51935	1.46253
22		3.75211	0.15468	1.59415	0.0703267	5.76592	0.286527		21	4.46503	3.93418	3.09317	3.76304	3.96442	3.61794	4.0288	3.40054	4.50755	2.93154		21	1.77297	1.61546	1.91466	1.81772	1.39807	1.89891	1.75197	1.25816	1.39587	1.46667	1.35659
23		3.83236	0.151279	1.60487	0.0692744	5.80059	0.301629		22	4.17352	4.04984	2.92369	3.60258	4.08032	3.65579	3.98056	3.63424	4.41449	3.00602		22	1.65775	1.69329	1.84812	1.72014	1.3994	2.03239	1.68396	1.26942	1.39837	1.46518	1.36757
24		3.73025	0.126367	1.61614	0.0662147	5.81804	0.323064		23	3.95088	4.12271	3.05783	3.69349	4.23235	3.92079	4.21166	3.57337	4.47233	3.08817		23	1.72047	1.59805	1.91659	1.61007	1.39207	1.99606	1.82154	1.37808	1.36517	1.44137	1.41408
25	120	3.71354	0.112066	1.64075	0.0683421	5.7547	0.306092		24	3.87026	3.9055	3.00201	3.86587	3.91375	3.8212	3.81425	3.66413	4.34909	3.09639		24	1.64803	1.69892	1.81148	1.69789	1.51499	2.10153	1.67256	1.34006	1.45537	1.42976	1.40698
26		3.72747	0.122908	1.66482	0.0746763	5.73897	0.314336		25	3.43033	3.70005	3.13614	3.77	4.03127	3.89284	3.74442	3.78533	4.34708	3.29792		25	1.64414	1.6467	1.79701	1.93482	1.53997	2.06871	1.68947	1.3058	1.48606	1.54256	1.39298
27		3.76265	0.120615	1.63816	0.0777278	5.72695	0.312146		26	3.85691	3.45792	3.08996	3.96175	3.86307	3.60804	3.85025	3.78641	4.49095	3.30942		26	1.72338	1.65284	1.92285	1.84895	1.53864	2.08928	1.8864	1.33091	1.45819	1.44554	1.41602
28		3.70401	0.126897	1.64204	0.0838596	5.68515	0.31398		27	3.86866	3.71086	2.99598	4.12916	3.74124	3.81771	3.75954	3.76467	4.42958	3.40909		27	1.71852	1.6339	1.83558	1.93404	1.52632	2.05996	1.80228	1.27623	1.4607	1.49732	1.27498
29		3.67811	0.110946	1.62663	0.0785398	5.66046	0.314415		28	3.70849	3.04748	3.21647	4.07601	3.78922	3.86954	3.84809	3.66359	4.41046	3.41073		28	1.70345	1.62417	1.80328	1.99063	1.51432	2.08709	1.90055	1.25862	1.43376	1.42768	1.31891
30		3.71208	0.107111	1.59782	0.0610324	5.55979	0.320253		29	3.82221	3.41373	3.11526	4.17437	3.66253	3.55853	3.7185	3.63152	4.27918	3.40526		29	1.61983	1.63185	1.71601	1.98595	1.52865	2.11379	1.7956	1.33091	1.4704	1.37202	1.32795
31		3.64507	0.122451	1.61716	0.0736957	5.62554	0.338717		30	3.92739	3.75035	3.07952	4.09339	3.5504	3.74316	3.56731	3.68152	4.27867	3.44907		30	1.61643	1.69329	1.74253	1.72365	1.57895	2.02845	1.62893	1.3532	1.45287	1.3747	1.38307
32		3.59076	0.108083	1.61269	0.0828903	5.53319	0.332006		31	3.76829	3.24307	3.07831	4.17784	3.57628	3.52708	3.40245	3.72989	4.33903	3.60843		31	1.68255	1.73938	1.73385	1.78259	1.52831	2.15055	1.66038	1.36024	1.45976	1.39375	1.29737
33		3.55085	0.117048	1.62219	0.0860556	5.5223	0.342772		32	3.70796	3.20357	3.00763	3.8306	3.66415	3.62027	3.24334	3.78804	4.15141	3.69058		32	1.58483	1.78136	1.69045	1.82358	1.47069	2.23501	1.65291	1.30533	1.53116	1.39702	1.26723
34		3.4675	0.141179	1.59263	0.0870452	5.4753	0.330458		33	3.7811	3.08651	3.11647	3.94734	3.65822	3.46185	3.07127	3.69565	4.14085	3.54929		33	1.63004	1.75371	1.75603	1.86027	1.51466	2.2547	1.67335	1.28022	1.43752	1.33452	1.34905
35		3.47253	0.150118	1.60951	0.0914011	5.51202	0.32778		34	3.50881	3.2567	2.79157	3.99652	3.51482	3.36226	2.86969	3.53098	4.25604	3.58762		34	1.62324	1.83922	1.7136	1.8466	1.4477	2.20175	1.56053	1.27435	1.36987	1.34405	1.29802
36		3.51288	0.149731	1.59741	0.0843164	5.45236	0.332703		35	3.38761	3.08181	2.65382	3.87332	3.49326	3.60047	3.00936	3.75815	4.32042	3.5471		35	1.56539	1.85868	1.75024	1.73536	1.51999	2.31947	1.61675	1.3072	1.39587	1.31637	1.31934
37	180	3.57501	0.145041	1.62173	0.0778133	5.46374	0.334746		36	3.37427	3.30983	2.44378	3.93343	3.59084	3.85964	3.23326	3.53478	4.14085	3.70811		36	1.59601	1.78955	1.83799	1.75644	1.50533	2.16718	1.64151	1.31448	1.40464	1.33899	1.21942
38		3.6013	0.147398	1.56825	0.0717146	5.41548	0.347447		37	3.51895	3.44993	2.50201	4.02583	3.55526	3.99243	3.35565	3.5837	4.11469	3.6517		37	1.66796	1.78239	1.63886	1.82397	1.50999	2.16893	1.75904	1.33584	1.45224	1.4128	1.28704
39		3.63777	0.142941	1.59654	0.0694392	5.40081	0.355015		38	3.60331	3.47485	2.48313	4.11575	3.60539	4.02504	3.41541	3.55978	4.05131	3.67908		38	1.62129	1.71685	1.71456	1.70453	1.46902	2.09759	1.54206	1.30674	1.38741	1.41488	1.27584
40		3.61086	0.151597	1.59032	0.0747696	5.42264	0.359666		39	3.51628	3.38834	2.62731	4.09836	3.5628	4.17531	3.63427	3.61685	4.12123	3.63691		39	1.65678	1.77522	1.7189	1.77049	1.41672	2.02407	1.69851	1.3004	1.51801	1.33512	1.34776
41		3.60335	0.15326	1.5917	0.0671974	5.45389	0.376305		40	3.69247	3.53973	2.47992	4.1391	3.59623	4.09726	3.34197	3.66522	4.0337	3.523		40	1.64171	1.7829	1.72372	1.71936	1.34943	2.11641	1.64151	1.33396	1.51362	1.36577	1.30512
42		3.64346	0.150061	1.58137	0.0797356	5.50665	0.382657		41	3.80032	3.46685	2.46948	3.9389	3.60647	4.25976	3.3067	3.69076	3.95976	3.5345		41	1.66699	1.76242	1.75699	1.75527	1.40806	2.03807	1.53223	1.3349	1.4917	1.43839	1.32364
43		3.54524	0.130407	1.60573	0.0599789	5.60766	0.386231		42	3.74853	3.49459	2.5502	4.05067	3.67278	4.33722	3.51332	3.53315	3.97988	3.55422		42	1.58872	1.74194	1.82787	1.61163	1.39074	2.15755	1.61124	1.33912	1.47792	1.46726	1.18109
44		3.42907	0.138488	1.58092	0.068156	5.59675	0.383019		43	3.8425	3.57546	2.53815	3.86736	3.70081	3.61211	3.56731	3.28424	4.01157	3.4529		43	1.57754	1.79314	1.78881	1.74083	1.55163	1.93348	1.60731	1.31518	1.50736	1.56071	1.28704
45		3.48017	0.14142	1.60155	0.0660242	5.64219	0.374012		44	3.77202	3.59285	2.45663	3.88276	3.72345	3.11066	3.7185	3.15109	3.64235	3.24042		44	1.61935	1.81925	1.73433	1.81343	1.57162	1.90066	1.45755	1.2605	1.47416	1.53423	1.205
46		3.47541	0.1474	1.60517	0.0575479	5.68351	0.373306		45	3.83556	3.66761	2.42289	3.99603	3.69704	3.46593	3.7005	3.22065	3.59507	3.20044		45	1.61157	1.88582	1.72035	1.7018	1.48801	1.99037	1.63836	1.31166	1.43501	1.5378	1.2963
47		3.47702	0.14345	1.61842	0.0617186	5.67264	0.378083		46	3.91084	3.49177	2.41968	3.97715	3.80916	3.4403	3.68323	3.21359	3.69115	3.1172		46	1.71317	1.89708	1.72035	1.67994	1.47102	1.81838	1.47995	1.28913	1.66207	1.57649	1.34927
48		3.52934	0.14956	1.6162	0.0668385	5.72815	0.379689		47	3.8393	3.41749	2.42169	4.02235	3.74825	3.46593	3.65515	3.40924	3.69769	3.0931		47	1.57073	1.81413	1.67213	1.8911	1.58361	1.91641	1.557	1.28115	1.65581	1.53393	1.32666
49	240	3.4766	0.144416	1.65024	0.0582413	5.74121	0.36193		48	3.99199	3.60179	2.40241	3.92648	3.88518	3.36284	3.67891	3.50978	3.76811	3.16594		48	1.60331	1.89657	1.6702	1.86105	1.44004	1.99344	1.50354	1.33185	1.63483	1.48036	1.36305
50		3.50399	0.13604	1.64446	0.0682904	5.76359	0.371725		49	3.86652	3.59897	2.4249	3.9841	3.73046	3.33838	3.2491	3.53043	3.84105	3.20208		49	1.67039	1.86431	1.78881	1.81694	1.55596	1.86302	1.66392	1.33466	1.71344	1.57113	1.31008
51		3.47522	0.146494	1.63584	0.067246	5.8225	0.381536		50	3.95889	3.65491	2.42209	3.84898	3.6496	3.47408	3.59971	3.4712	3.71781	3.24261		50	1.55907	1.93497	1.73095	1.87978	1.48068	2.00088	1.51494	1.32269	1.70623	1.59345	1.36542
52		3.43917	0.151539	1.64267	0.0736891	5.83544	0.387623		51	3.87774	3.63799	2.45382	3.83706	3.76226	3.14502	3.75522	3.46957	3.78722	3.02629		51	1.57073	1.88633	1.60656	1.89891	1.499	2.04333	1.59395	1.34593	1.63514	1.57113	1.34324
53		3.47115	0.149141	1.66216	0.0731326	5.93351	0.404397		52	4.02403	3.67184	2.4	3.75807	3.29757	2.99884	3.67819	3.52011	3.83602	3.20701		52	1.54108	1.97133	1.61234	1.77166	1.49933	2.13654	1.56604	1.33466	1.71438	1.57292	1.34905
54		3.50239	0.152229	1.67146	0.0777442	5.92674	0.40201		53	3.88788	3.70099	2.43133	3.71386	3.36658	3.00349	3.92153	3.57011	3.85614	3.25958		53	1.51045	1.98976	1.58486	1.88525	1.51166	2.10372	1.63483	1.38653	1.70811	1.63006	1.3385
55		3.47811	0.18334	1.64955	0.0734072	6.00682	0.4162		54	4.06674	3.6079	2.53414	3.70989	3.15849	3.03378	4	3.59293	3.917	3.40307		54	1.5124	1.96518	1.54484	1.87432	1.57295	2.22801	1.63011	1.41141	1.65049	1.65119	1.34518
56		3.51622	0.18604	1.64472	0.0726602	5.96133	0.397675		55	4.19648	3.67795	2.49759	3.77397	2.79892	2.9074	4.10367	3.48098	3.96076	3.38335		55	1.52115	1.77983	1.53134	1.89266	1.44204	2.16718	1.65527	1.42971	1.75196	1.66518	1.30879
57		3.5226	0.180858	1.6578	0.0765948	5.99771	0.415162		56	4.21783	3.68265	2.51325	3.65971	2.94555	3.16657	4.51836	3.42989	3.74748	3.28094		56	1.52018	1.78546	1.56654	1.92935	1.38041	2.0849	1.80542	1.36893	1.69464	1.60982	1.34625
58		3.5802	0.220216	1.61554	0.0681908	5.9718	0.39292		57	4.2221	3.67043	2.53896	3.70442	3.16819	3.25044	4.57019	3.39402	3.52867	3.17853		57	1.45552	1.76549	1.55111	2.01366	1.48934	2.12516	1.84395	1.36001	1.68212	1.56696	1.38243
59		3.50972	0.222329	1.61175	0.0774379	6.04002	0.397033		58	4.52696	3.58909	2.52972	3.60854	3.34447	3.23238	4.94888	3.38261	3.5835	3.05586		58	1.40933	1.69483	1.57088	2.01366	1.43105	2.02888	1.66274	1.41188	1.55434	1.6006	1.39276
60		3.53208	0.230517	1.63523	0.075998	6.09855	0.387252		59	4.20288	3.48942	2.41165	3.60109	3.48787	3.42108	4.99208	3.13587	3.4839	2.8713		59	1.39281	1.68817	1.63742	1.96487	1.47402	2.16236	1.59434	1.41962	1.47917	1.62619	1.29027
61	300	3.56783	0.219323	1.59332	0.0759775	6.13017	0.395497		60	4.31927	3.55994	2.42932	3.62692	3.5407	3.38381	5.04824	3.28315	3.30684	2.82256		60	1.44288	1.78239	1.48554	1.97814	1.54031	2.13348	1.77673	1.38536	1.57751	1.54107	1.3441
62		3.64259	0.235371	1.55404	0.060728	6.23516	0.408765		61	4.46503	3.66102	2.5494	3.67014	3.45714	3.48515	4.86105	3.40054	3.41197	2.71687		61	1.39183	1.73886	1.47878	1.84817	1.52965	2.19125	1.57586	1.41117	1.50673	1.56369	1.29048
63		3.65329	0.250711	1.56674	0.056776	6.25307	0.394259		62	4.42232	3.62858	2.48233	3.56384	3.59892	3.6028	5.17639	3.54076	3.57646	2.83352		62	1.39961	1.77522	1.39489	1.7619	1.42838	1.96411	1.5228	1.4283	1.56624	1.55089	1.30211
64		3.69405	0.246362	1.59614	0.0649889	6.21462	0.403086		63	4.51628	3.66855	2.48233	3.58967	3.43827	3.76587	5.31893	3.425	3.45775	2.87021		63	1.47934	1.72913	1.50145	1.79547	1.42938	1.89628	1.65173	1.4269	1.46445	1.60595	1.25409
65		3.73289	0.261287	1.59631	0.0695761	6.22925	0.375844		64	4.39989	3.71462	2.5498	3.45753	3.73208	3.73384	5.40533	3.59402	3.42354	2.9299		64	1.49927	1.7445	1.46914	1.9395	1.49101	1.9628	1.69575	1.42736	1.44942	1.58869	1.29005
66		3.70126	0.257642	1.60585	0.0677947	6.27858	0.381286		65	4.3481	3.77433	2.52972	3.49975	3.8	3.72219	5.62347	3.67717	3.35362	3.00055		65	1.50462	1.681	1.51929	1.80757	1.50366	2.14486	1.64544	1.39709	1.43909	1.61964	1.29716
67		3.69172	0.240511	1.61275	0.0724594	6.21855	0.376483		66	4.25681	3.72543	2.46466	3.37407	3.7779	3.82062	5.55364	3.6788	3.31087	3.04984		66	1.42392	1.58167	1.46673	1.88642	1.51632	2.11291	1.74882	1.45013	1.49796	1.60238	1.37705
68		3.68684	0.241428	1.63835	0.0632518	6.2657	0.393369		67	4.29311	3.80771	2.53815	3.49131	3.80485	3.77985	5.36141	3.53207	3.31036	2.99836		67	1.39864	1.64209	1.41273	1.9477	1.501	2.14354	1.69261	1.46069	1.50047	1.63274	1.40805
69		3.74241	0.259314	1.59498	0.0474013	6.26193	0.395772		68	4.20822	3.70569	2.55622	3.4769	3.65121	3.99767	5.40677	3.46304	3.39336	3.00931		68	1.57025	1.66359	1.59595	1.95043	1.46636	2.10985	1.61753	1.47055	1.50078	1.62827	1.44832
70		3.75125	0.257617	1.58091	0.0441962	6.3603	0.387329		69	4.35825	3.86225	2.59438	3.66518	3.57466	3.86546	5.63355	3.52772	3.26157	3.08105		69	1.65727	1.69585	1.50916	1.8911	1.45736	1.79956	1.62539	1.42173	1.47385	1.59643	1.4171
71		3.74712	0.248927	1.5677	0.0543862	6.41344	0.391969		70	4.32408	3.90973	2.66546	3.72777	3.61941	3.9138	5.63499	3.42554	3.21227	3.07941		70	1.59942	1.68664	1.49807	1.80094	1.45636	1.84902	1.47406	1.4574	1.51394	1.63601	1.41817
72		3.71151	0.197736	1.54959	0.0396806	6.3892	0.388532		71	4.43406	3.88811	2.64096	3.58569	3.73046	4.05824	5.43988	3.39457	3.28119	3.01807		71	1.56296	1.66462	1.46143	1.86222	1.38208	1.90591	1.48781	1.37386	1.49796	1.6131	1.43282
73	360	3.69647	0.188453	1.56234	0.0300601	6.40687	0.386178		72	4.33849	3.86836	2.69478	3.57476	3.79677	4.24869	4.7581	3.4462	3.35664	3.03231		72	1.67185	1.66769	1.47782	1.77752	1.38574	1.64114	1.36203	1.48697	1.5202	1.60149	1.45306
74		3.67921	0.167427	1.55576	0.0369884	6.5104	0.399206		73	4.22371	3.94687	2.6249	3.56085	3.69111	3.96506	4.82289	3.53098	3.34859	3.24973		73	1.60622	1.66923	1.49084	1.69009	1.48135	1.71204	1.54009	1.46797	1.46351	1.61786	1.4466
75		3.70033	0.159475	1.55562	0.043634	6.56442	0.396745		74	4.25414	3.98354	2.70201	3.65822	3.61995	4.05766	4.47228	3.47011	3.38028	3.19387		74	1.55518	1.66564	1.46577	1.74434	1.48334	1.76411	1.44418	1.47055	1.48137	1.61488	1.42399
76		3.72713	0.165829	1.5414	0.0458659	6.60269	0.421567		75	4.25147	4.05548	2.70161	3.65922	3.74555	4.13046	4.27286	3.47065	3.52817	3.18784		75	1.53719	1.72401	1.51398	1.63544	1.56562	1.83632	1.38836	1.42103	1.40213	1.65298	1.43475
77		3.72205	0.162446	1.54052	0.0413052	6.62294	0.430614		76	4.33049	4.10484	2.69197	3.65872	3.81402	4.27257	4.17783	3.4	3.60563	3.21522		76	1.54059	1.73221	1.44166	1.56792	1.45769	1.80088	1.42531	1.47524	1.34701	1.74286	1.42399
78		3.7327	0.159423	1.52952	0.0440715	6.54135	0.436541		77	4.24453	4.13869	2.7257	3.74168	3.66038	4.29645	4.21598	3.47228	3.49748	3.22727		77	1.55032	1.71633	1.44937	1.70258	1.36609	1.75492	1.48585	1.48862	1.36079	1.59732	1.47351
79		3.69968	0.17848	1.53574	0.0395599	6.62173	0.439476		78	4.36999	4.11707	2.73333	3.97963	3.669	4.23296	3.95968	3.4663	3.59306	3.20591		78	1.55907	1.7491	1.37416	1.67291	1.37275	1.58293	1.33019	1.52546	1.45099	1.7369	1.47028
80		3.70927	0.170843	1.55092	0.0432606	6.54836	0.448914		79	4.38121	4.25388	2.66787	3.90363	3.58059	4.34362	3.84305	3.36739	3.60412	3.05148		79	1.62664	1.72401	1.4648	1.55035	1.36542	1.64683	1.35653	1.47055	1.43251	1.72232	1.53316
81		3.78231	0.185559	1.52805	0.0428032	6.5603	0.449227		80	4.36572	4.17536	2.73976	3.769	3.68625	4.37682	3.93665	3.45272	3.54879	3.04162		80	1.55275	1.61086	1.45371	1.40984	1.31179	1.85077	1.56329	1.55011	1.50423	1.70417	1.54866
82		3.74764	0.172423	1.5189	0.0362393	6.70134	0.424314		81	4.39295	4.23836	2.7992	3.82712	3.74286	4.62376	4.05472	3.49946	3.68461	2.96002		81	1.60525	1.64823	1.44021	1.66159	1.31213	1.68972	1.27712	1.50223	1.45694	1.63482	1.58032
83		3.78312	0.167695	1.53678	0.0396248	6.63414	0.419105		82	4.44047	4.27221	2.81044	3.59662	3.69596	4.53465	3.71778	3.46087	3.76006	3.18729		82	1.53768	1.63543	1.36596	1.60929	1.28548	1.54004	1.49214	1.50411	1.45349	1.70714	1.57709
84		3.76048	0.165357	1.50016	0.0405492	6.73724	0.435844		83	4.39402	4.34509	2.92731	3.77596	3.67978	4.53232	3.68467	3.47989	3.88179	3.13034		83	1.64025	1.66513	1.34282	1.67642	1.3551	1.55842	1.47013	1.53954	1.41466	1.7244	1.51766
85	420	3.75347	0.175364	1.5548	0.0499683	6.67797	0.418002		84	4.15643	4.4363	2.79398	3.72032	3.72291	4.4403	3.65659	3.57011	3.95121	3.15663		84	1.55566	1.72709	1.37512	1.45394	1.30913	1.46171	1.46187	1.52312	1.3586	1.71071	1.56481
86		3.76915	0.183196	1.53131	0.062433	6.62295	0.418033		85	4.22531	4.30936	2.75743	3.75062	3.69111	4.55271	3.43557	3.5663	4.08753	3.15882		85	1.58192	1.76498	1.41369	1.6331	1.27682	1.86258	1.56368	1.48651	1.39367	1.58363	1.5422
87		3.80717	0.188438	1.53621	0.0666546	6.57258	0.426322		86	4.41164	4.26939	2.72209	3.82265	3.74501	4.54688	3.46796	3.45598	4.08451	3.16539		86	1.55129	1.79365	1.38959	1.38056	1.23684	1.92123	1.42217	1.48533	1.37426	1.72708	1.56245
88		3.79297	0.193701	1.54413	0.0708212	6.61643	0.435407		87	4.45328	4.24071	2.76948	3.84203	3.56712	4.73151	3.60979	3.56141	4.12274	3.1736		87	1.60963	1.73733	1.48409	1.24005	1.20986	1.96455	1.53774	1.41188	1.42217	1.71875	1.56223
89		3.80233	0.187724	1.46481	0.0715375	6.49951	0.41574		88	4.42392	4.1481	2.74779	3.88525	3.56981	4.82236	3.54068	3.48098	4.12626	3.18456		88	1.60963	1.74603	1.34667	1.46682	1.10227	2.01969	1.49686	1.50528	1.42562	1.69077	1.5758
90		3.84852	0.187519	1.4449	0.0671537	6.42691	0.411066		89	4.52002	4.16267	2.69438	3.83805	3.70404	4.60047	3.5342	3.5462	4.21026	3.21303		89	1.67963	1.74091	1.35873	1.08275	1.08161	1.74136	1.55621	1.40671	1.31381	1.59732	1.55383
91		3.73502	0.202085	1.42619	0.0597864	6.41136	0.422515		90	4.49653	4.11472	2.69438	3.88525	3.85067	4.73034	3.85457	3.41196	4.13632	3.31051		90	1.62664	1.81106	1.35005	1.16432	1.00766	1.59081	1.44929	1.44356	1.36768	1.49583	1.58699
92		3.82554	0.195571	1.385	0.0629121	6.39973	0.412031		91	4.46022	4.0724	2.68474	3.73174	3.82588	4.68608	3.36789	3.3462	4.17505	3		91	1.58337	1.80594	1.28158	1.28649	1.03664	1.44945	1.36203	1.52359	1.39868	1.40476	1.55556
93		3.74524	0.203732	1.40929	0.0666105	6.29814	0.414499		92	4.32355	4.14528	2.7241	3.83607	3.96712	4.83692	3.50252	3.53207	4.24648	3.14129		92	1.5474	1.78443	1.19431	1.16745	1.09427	1.52035	1.22091	1.49589	1.32947	1.35506	1.52541
94		3.81043	0.191811	1.31352	0.0841707	6.28099	0.392405		93	4.26268	4.18383	2.73494	3.6155	3.97844	4.86663	3.2671	3.4163	4.07495	3.05203		93	1.59212	1.86892	1.26471	1.32709	1.08261	1.42319	1.16785	1.57287	1.36517	1.31488	1.52283
95		3.71536	0.206558	1.25418	0.0944867	6.15359	0.399599		94	4.36466	4.18994	2.95462	3.60954	3.98544	4.85265	3.43916	3.5125	4.16952	3.02629		94	1.51823	1.96211	1.15718	0.998439	0.974017	1.30022	1.14308	1.52312	1.25055	1.29315	1.3286
96		3.734	0.206281			5.99204	0.367047		95	4.22851	4.09685	2.74378	3.29309	4.01779	4.86721	3.40749	3.32717	4.13883	3.03286		95	1.48031	1.936	1.09547	1.0402	0.888408	1.24158	1.24882	1.53462	1.32321	1.16518	0.842162
97	480	3.74022	0.206372			5.7585	0.348709		96	4.27923	4.15656	2.76145	3.42126	4.03881	4.84741	3.39957	3.2625	4.13431	3.03888
98		3.63533	0.199961			5.70241	0.35383		97	4.33849	4.23554	2.76024	3.39394	4.131	4.66278	3.36357	3.33315	4.22183	2.96166
99		3.56708	0.182326			5.57994	0.343422		98	4.15163	4.03338	2.83333	3.28713	4.08841	4.70355	3.24046	3.15652	3.97384	2.88499
100		3.56464	0.163066			5.4282	0.327486		99	4.09984	4.12271	2.88916	3.28713	3.73531	4.49621	3.13751	3.22337	3.87072	2.80887
101		3.52401	0.168097			5.27558	0.304357		100	4.16284	4.01269	2.78795	3.38997	3.7628	4.2318	3.19654	3.34511	3.85966	2.89704
102		3.43715	0.167963			4.90251	0.250717		101	4.0913	3.93277	2.86466	3.28366	3.71752	4.34595	3.11303	3.29239	3.81187	2.78697
103		3.319	0.165257			4.81647	0.220689		102	4.0913	3.90362	2.72771	3.30949	3.41995	4.18346	3	3.23478	3.75805	2.74315
104		3.37314	0.167125			4.64366	0.248497		103	4.11105	3.66244	2.74618	3.28614	3.26739	4.01747	2.87185	2.98804	3.62173	2.61774
105		3.26928	0.164692			4.47973	0.259615		104	4.06086	3.80912	2.77108	3.31495	3.3159	4.17822	2.88841	3.15707	3.57696	2.65882
106		3.2773	0.187176			4.23136	0.256589		105	3.92846	3.87353	2.61486	3.18331	3.25229	3.9604	2.84665	3.07011	3.39638	2.56681
107		3.21771	0.18458			4.07533	0.272726		106	4.03791	3.9638	2.54498	3.26925	3.05606	4.17472	2.83945	3.01304	3.26811	2.6057
108		3.22493	0.190208			3.82077	0.261684		107	3.90603	3.70146	2.57068	3.12072	3.06469	4.20559	2.52844	2.93913	3.47938	2.66101
109	540	3.16125	0.205876			3.70454	0.301436		108	3.86332	3.85567	2.58112	3.03577	3.07116	4.21607	2.59251	2.8212	3.55533	2.65717
110		3.08401	0.189057			3.65561	0.315008		109	3.83342	3.93089	2.48273	2.99006	3.09111	4.09843	2.2455	2.87283	3.50453	2.56298
111		3.05525	0.189711						110	3.86813	3.874	2.52088	2.88227	2.65391	3.87362	2.50036	2.70109	3.37274	2.5931
112		3.02746	0.206562						111	3.78857	3.64081	2.39197	2.80576	2.39353	4.00291	2.60763	2.74783	3.42103	2.75246
113		2.98445	0.174939						112	3.89963	3.86366	2.40884	2.85792	2.54124	3.90681	2.33189	2.46141	3.27867	2.72453
114		2.9551	0.182109						113	3.77309	3.74283	2.49277	2.8773	2.49326	3.64706	2.37437	2.60707	3.14235	2.69441
115		2.83665	0.172849						114	3.71116	3.65961	2.29679	3.02832	2.44744	3.59814	2.19942	2.62446	3.24145	2.74425
									115	3.66044	3.79408	2.26265	2.84799	2.29488	3.05067	2.38877	2.4	2.96278	2.70427

## Sheet: D
	average	SEM		WT	Dia shRNA	ArpC4 shRNA
WT	206.015	9.45999		235.421	194.813	91.1046
Dia shRNA	190.739	9.07266		208.788	223.246	89.1696
ArpC4 shRNA	122.438	7.70345		181.349	200.887	100.967
				191.024	209.137	116.904
				238.753	195.109	122.225
				267.939	176.324	129.051
				223.596	142.381	114.351
				196.856	181.188	153.453
				226.283	232.357	124.886
				172.185	151.948	129.105
				182.962		175.598
				221.634
				178.823
				153.561
				211.045

## Sheet: E
Cap area change 0-120s
WT	Dia shRNA	ArpC4 shRNA
7.03376	3.87026	1.64803
7.13032	3.9055	1.69892
3.46098	3.00201	1.81148
4.77191	3.86587	1.69789
4.84225	3.91375	1.51499
7.37698	3.8212	2.10153
5.38728	3.81425	1.67256
4.59878	3.66413	1.34006
5.92176	4.34909	1.45537
7.25828	3.09639	1.42976
4.54863		1.40698
4.91959
7.13029
6.41895
6.47092

## Sheet: F
average intensity at 120s
WT (average)	SEM	Dia shRNA (average)	SEM	ArpC4 shRNA (average)	SEM
2810.52	142.042	2317.6	61.6031	1338.77	89.6001
2216.65		2503.59		1818.78
2379.04		2157.01		1826.8
2498.15		2349.33		1913.4
2405.84		2530.42		1279.04
2316.48		2382.74		1397.33
2240.58		2484.09		1094.37
2666.93		2488.96		1144.14
3454.03		2085.59		1054.64
3410.83		1991.05		913.557
3548.92		2203.27		1213.36
3202.15				1250.81
3499.66				1403.53
				1094.24

## Sheet: G
cap expansion rate 0-120s
WT	Dia shRNA	ArpC4 shRNA
1.87958	1.25632	0.31151
1.61598	1.44421	0.31899
1.11284	1.16495	0.3933
1.26754	1.34816	0.41784
1.61083	1.2631	0.36129
2.07144	1.132	0.5882
1.48254	0.9135	0.39985
1.37925	1.14555	0.33862
1.6758	1.55592	0.33979
1.32503	0.89457	0.33745
1.33017		0.44168
1.51502
1.31942
1.10933
1.60452

## Sheet: H
Cap heterogeneity at 120s
WT (average)	SEM	Dia shRNA (average)	SEM	Arp shRNA (average)	SEM
691.08	68.6572	801.671	34.9422	371.882	18.514
520.413		916.026		481.587
607.37		864.581		419.985
529.06		888.857		412.584
566.244		876.82		306.241
545.544		822.758		314.776
651.794		908.712		289.721
691.231		777.06		357.045
1109.99		621.598		322.862
1029.57		664.205		263.196
1076.11		676.087		402.599
965.539				404.675
956.502				425.761
383.82				433.43
363.113
369.905
