# Supplementary material for: Combinatorial deployment of F-actin regulators to build complex 3D actin structures in vivo
Source: eLife. 2021 May 5;10:e63046. doi: 10.7554/eLife.63046 (PMC8149123; doi:10.7554/eLife.63046)
Supplement: Figure 3—source data 1. [file elife-63046-fig3-data1.xlsx]

## Sheet: B,E,G,I,K,M
Time point	Time(s)	WT cycle 11 cap size change (average)	SEM	DPod1 shRNA(average)	SEM	Coronin shRNA(average)	SEM	Cortactin shRNA(average)	SEM	Scar shRNA(average)	SEM	Carmil shRNA(average)	SEM		DPod1_1	DPod1_2	DPod1_3	DPod1_4	DPod1_5	DPod1_6	DPod1_7	DPod1_8	DPod1_9	DPod1_10	DPod1_11		Coronin_1	Coronin_2	Coronin_3	Coronin_4	Coronin_5	Coronin_6	Coronin_7	Coronin_8	Coronin_9		Cortactin_1	Cortactin_2	Cortactin_3	Cortactin_4	Cortactin_5	Cortactin_6	Cortactin_7	Cortactin_8	Cortactin_9	Cortactin_10	Cortactin_11	Cortactin_12
1	0	1	0	1	0	1	0	1	0	1	0	1	0		1	1	1	1	1	1	1	1	1	1	1		1	1	1	1	1	1	1	1	1		1	1	1	1	1	1	1	1	1	1	1	1
2		1.49023	0.107816	1.45369	0.0542977	1.30198	0.120865	1.45129	0.0730181	1.742	0.113444	1.41609	0.10018		1.642	1.47934	1.59841	1.32787	1.52662	1.71997	1.51458	1.45085	1.09118	1.27375	1.36605		1.75922	1.19572	1.06086	1.30882	1.18526	1.37033	1.35545	1.11005	1.03542		1.90828	1.74099	1.03342	1.525	1.21752	1.34843	1.43265	1.33183	1.62963	1.68694	1.22859	1.33219
3		1.98118	0.175464	1.75134	0.07755	1.658	0.129928	1.8432	0.104282	2.05662	0.174865	2.33654	0.25874		1.89897	2.02715	1.98198	1.63934	1.6278	2.08122	1.8377	1.85153	1.24911	1.60732	1.46258		2.01392	1.69352	1.21424	1.75965	1.6087	1.67426	1.59737	1.48166	1.09916		2.60308	2.0795	1.30674	2.04573	1.85165	1.27362	1.83676	1.83813	2.10388	1.85099	1.57278	1.75548
4		2.38003	0.198465	2.12434	0.0777984	1.867	0.111782	2.3038	0.124289	2.36789	0.228806	3.18132	0.366364		1.97613	2.46399	2.35328	1.92474	2.12143	2.02242	2.12715	2.32203	1.68832	2.49191	1.87636		2.20877	1.92322	1.52039	1.77619	1.90643	2.15075	1.8386	1.89234	1.15583		2.77841	2.97516	1.48571	2.51098	2.4804	1.65354	2.21005	2.17716	2.66757	2.32946	2.1093	2.26781
5		2.82835	0.204702	2.54772	0.120185	2.05269	0.164047	2.84162	0.187897	2.63565	0.220815	3.51194	0.344759		2.56006	2.95632	2.56453	2.6006	2.3172	1.98223	2.51458	2.76339	2.14362	3.40113	2.22126		2.25331	1.87351	1.55386	2.06434	2.51843	2.54338	2.15041	2.55263	1.29363		3.56331	3.08075	1.72722	2.83902	4.08839	2.02822	2.63642	2.66727	2.98645	2.9255	2.27063	3.2863
6		3.22998	0.209812	2.85779	0.133101	2.43725	0.237143	3.21941	0.233027	2.95186	0.237294	3.74502	0.338734		2.94988	3.07143	2.60923	3.16468	2.49714	2.16244	2.73523	3.15525	2.48689	3.79662	2.80694		2.92136	2.14223	1.80828	2.26287	3.05151	2.92196	2.72331	2.72249	1.58467		3.87013	3.13913	1.64636	3.77317	4.7917	2.52953	2.82705	3.14209	3.68202	3.16951	2.50131	3.56096
7		3.56259	0.223288	3.20562	0.126044	2.63548	0.174536	3.35893	0.204801	3.11707	0.251828	3.98633	0.298688		3.2315	3.41381	3.19466	3.68703	2.8689	2.31599	2.88556	3.52542	2.97437	3.69388	3.47072		2.86987	2.11391	2.32684	2.86443	3.00236	3.20213	2.87442	3.10925	1.82872		3.75974	3.37391	2.07062	3.8939	4.63566	3.0164	2.76427	3.39568	3.77145	3.1743	2.48818	3.96301
8		3.93918	0.280741	3.46546	0.204894	2.85846	0.171249	3.57182	0.249467	3.28623	0.237337	4.21284	0.26556		4.20764	3.683	3.6287	4.59165	2.80862	2.37352	2.75168	3.90169	2.94577	3.82266	3.4051		3.35978	2.33984	2.84297	2.69393	3.05577	3.08386	2.86733	3.52392	2.16162		4.4513	3.42733	2.12668	4.125	5.25288	2.95538	3.05936	3.45863	4.34869	3.29802	2.65108	3.70753
9		4.41407	0.35367	3.82405	0.229925	3.01761	0.263611	3.85069	0.274268	3.40002	0.266705	4.57754	0.246405		4.59905	3.89079	4.60202	4.78912	3	2.73435	2.62827	3.91254	3.71931	4.42013	3.76898		3.92067	2.37445	2.66586	2.93566	3.1914	2.984	3.25364	4.51276	2.34707		5.28247	3.6205	2.26092	4.13415	5.49424	3.27559	3.29566	3.56295	4.71454	3.40055	2.99002	4.17671
10		4.70617	0.346966	4.10066	0.274139	3.13968	0.181356	3.98101	0.279889	3.52238	0.246752	4.8361	0.283402		4.30947	3.86364	4.97549	5.76602	3.40475	2.54357	2.9454	4.1322	4.27175	4.68614	4.20879		3.78845	2.73568	2.8801	3.09145	3.20274	3.50848	3.39695	5.01515	2.73857		5.98052	3.92112	2.20323	4.36159	5.15219	3.50656	3.45263	3.96942	4.32791	4.02939	2.96689	3.90068
11		4.92877	0.356016	4.34214	0.248429	3.38053	0.262296	4.10724	0.266963	3.56795	0.21802	5.1061	0.249126		4.93079	3.8536	4.60346	5.87183	3.42763	2.85829	3.79357	4.27932	4.71335	4.8487	4.58297		4.34238	2.74072	3.33293	3.27114	3.2155	3.67087	3.51224	6.23525	3.00451		5.71753	4.08323	2.2248	4.01951	5.24289	3.81562	3.82591	4.22662	4.97471	4.07997	3.09459	3.98151
12		5.07671	0.348609	4.75289	0.273369	3.46393	0.169754	4.18781	0.26929	3.67064	0.232629	5.32445	0.252019		4.40016	4.30283	5.74766	6.35842	3.82534	3.12098	4.34854	4.68271	5.02622	5.4532	5.01573		3.79749	2.95595	3.87523	3.41544	3.27552	4.27096	3.8613	6.37799	2.95943		5.6599	4.13727	2.39137	4.30671	5.05073	3.96457	3.84418	4.36061	5.51671	4.31032	3.19285	3.51849
13	60	5.20509	0.361806	4.91627	0.292495	3.56175	0.232878	4.19138	0.245492	3.79499	0.214666	5.58092	0.283552		4.43516	4.53129	5.80389	6.96945	3.63616	3.75973	4.18025	4.9078	5.24911	5.52639	5.07972		4.39875	3.08999	3.71455	3.34743	3.25803	4.71062	4.04541	6.24641	3.11204		5.72727	4.0677	2.65067	4.15183	4.97079	4.14829	4.01941	4.47032	4.95754	4.5728	3.06201	3.49795
14		5.34171	0.359316	5.2066	0.301407	3.704	0.287739	4.24177	0.22389	3.81672	0.220653	5.89739	0.326644		4.9992	4.48937	6.31651	7.09091	3.94721	3.728	4.62229	5.34305	5.53337	5.37509	5.82755		4.77314	3.12398	3.77967	3.49632	3.34688	4.18032	4.15147	6.23764	3.30457		5.79383	4.20621	2.92075	4.07622	5.07302	4.58465	4.31336	3.92356	4.43812	4.68148	3.35102	3.53904
15		5.35807	0.346885	5.44296	0.336185	3.82625	0.27441	4.3397	0.217371	3.95201	0.199743	5.97595	0.295685		4.69928	4.45336	6.55371	7.19672	4.09107	3.64002	5.33283	5.49153	6.02026	6.31457	6.07918		4.76896	3.35809	4.12416	3.51425	3.36578	4.09113	4.24193	6.54466	3.45847		5.7914	4.0441	3.26846	4.24573	4.96311	4.94423	4.30023	3.86151	4.95754	4.67601	3.37677	3.64726
16		5.42648	0.331385	5.4364	0.377577	3.85446	0.249566	4.40563	0.218803	4.04401	0.219046	6.02624	0.304353		4.45585	4.47875	6.95386	7.11923	3.75627	3.68232	4.8347	5.6461	6.24851	6.6031	6.02169		4.65762	3.52863	4.20755	3.55101	3.3275	4.88997	4.15644	6.30861	4.11204		5.85877	4.09317	3.16334	4.19756	4.86318	5.28346	4.29281	4.01978	4.98284	4.69173	3.69417	3.72671
17		5.55249	0.318779	5.6051	0.362614	3.87618	0.265098	4.44575	0.192945	4.13307	0.208253	6.11926	0.33461		4.95227	4.64817	6.72819	7.66393	3.93093	3.93866	5.0905	5.73831	6.40048	6.60591	5.95879		4.74809	3.62366	4.21729	3.44026	3.35161	5.28502	4.11884	6.16427	4.1217		5.77435	4.16025	3.48032	4.05183	4.77018	4.99409	4.56279	4.44335	4.9991	4.74299	3.62112	3.74863
18		5.56387	0.340364	5.61568	0.327676	3.92141	0.193433	4.50818	0.208508	4.23558	0.20635	6.19839	0.327515		5.60223	4.60213	6.26676	7.36587	4.26925	3.7758	5.21541	5.52746	6.20262	6.71499	6.22993		4.41058	3.94651	4.27876	3.46461	3.50662	5.33349	3.91699	6.09171	4.57373		5.53977	4.08758	3.49111	4.31951	4.65949	5.8143	4.6524	4.56025	5.0804	4.5188	3.69101	3.68356
19		5.70988	0.349869	5.45389	0.349928	3.93625	0.158013	4.47324	0.215119	4.21959	0.212775	6.25219	0.347872		5.47414	4.84829	5.93511	7.49106	4.08227	3.40228	4.5647	5.58847	6.18534	6.47643	5.94469		4.12526	4.08748	4.33901	3.60018	3.5293	5.33689	4.20504	5.66348	4.82099		5.61445	3.94099	3.53585	4.025	4.59877	5.83071	4.56792	4.67986	5.01897	4.48462	3.76458	3.61712
20		5.78849	0.341576	5.71275	0.360292	4.05268	0.186019	4.48486	0.209676	4.33212	0.222315	6.21969	0.311004		6.0899	5.04191	6.52055	7.39344	4.18786	3.28173	5.27001	5.77831	6.32241	6.81914	6.13503		4.25957	4.3713	4.42057	3.52436	3.68762	5.0795	4.00851	5.93301	5.16549		5.50081	4.0205	3.60054	4.22378	4.41891	5.94751	4.5274	4.44155	5.17164	4.46822	3.78245	3.71507
21		5.75058	0.315134	5.77874	0.382518	4.01742	0.17811	4.47094	0.187647	4.46972	0.210818	6.35304	0.315712		6.92761	5.08264	6.5876	7.20566	4.18874	3.07318	5.76066	5.64068	5.82539	6.99578	6.2782		4.24217	4.19006	4.43579	3.45726	3.76181	5.34028	3.5917	5.57974	5.27431		5.57305	3.96273	3.60809	4.29695	4.42736	5.13123	4.53196	4.7455	5.12737	4.8961	3.73043	3.62055
22		5.76592	0.286527	5.83194	0.405213	4.12402	0.20368	4.55524	0.222932	4.43171	0.230747	6.24794	0.334993		6.5895	5.18123	6.50901	7.35991	4.26881	3.0313	5.41212	5.74847	5.85697	7.64462	6.54935		4.51705	4.44116	4.39805	3.54458	3.71928	5.13476	3.64172	5.32536	5.41339		5.86932	4.00807	3.54394	4.13293	4.07379	5.50722	4.61073	4.89748	5.40018	5.01846	3.85759	3.74315
23		5.80059	0.301629	5.6968	0.395273	4.16014	0.214014	4.45438	0.194644	4.62195	0.258207	6.1148	0.390495		6.86635	4.88312	6.35472	7.26006	4.16718	2.85956	5.76141	5.85559	5.80572	7.05278	5.79826		4.6277	4.43675	4.4297	3.52206	3.7845	4.31604	3.51685	4.84689	5.41468		5.60308	4.00124	3.55526	4.08841	4.11683	4.88714	4.49886	4.91727	5.30443	4.98906	3.7835	3.70753
24		5.81804	0.323064	5.73938	0.394346	4.05351	0.177429	4.51519	0.215585	4.50068	0.21022	6.07348	0.371278		7.28799	5.12751	6.60779	7.20343	4.04707	3.08926	5.5819	5.88881	5.76937	6.95355	5.57646		4.28253	4.31781	4.40231	3.50781	3.75709	4.52836	3.67151	4.89314	5.98326		5.58198	3.99752	3.47547	4.0628	4.14143	5.39895	4.45205	5.09442	5.33604	5.11415	3.86653	3.66096
25	120	5.7547	0.306092	5.51843	0.429096	4.00889	0.139451	4.45725	0.212586	4.49314	0.166971	6.00054	0.385204		7.28401	4.3902	6.13771	7.54322	3.54114	3.08672	5.273	5.53763	5.71514	6.72484	5.46909		4.33473	4.21145	4.13755	3.61213	3.74858	4.50024	3.62682	5.21451	6.29234		5.56006	3.9528	3.29003	4.10488	4.00769	5.3773	4.27226	5.18705	5.28636	4.67532	3.94377	3.82945
26		5.73897	0.314336	5.4656	0.431068	4.04761	0.102481	4.52091	0.219744	4.475	0.229965	5.9278	0.371304		7.90692	4.48996	6.23071	7.02832	4.06291	2.92766	5.26402	5.48203	5.74851	6.48276	4.49783		4.16771	4.309	4.12903	3.73392	3.89839	4.06592	3.65768	5.42584	6.19768		5.63068	3.8236	3.34286	4.03476	4.21522	5.44619	4.6855	5.32644	5.24571	4.74641	3.8618	3.89178
27		5.72695	0.312146	5.34777	0.4213	3.97624	0.134731	4.39946	0.200579	4.56302	0.23105	5.91782	0.365413		7.55211	4.46812	5.80029	7.17958	3.7048	3.08545	5.11144	5.13288	5.64482	6.62702	4.51898		4.06054	4.20516	4.28606	3.58272	3.74669	4.11827	3.66797	5.5949	5.59111		5.53734	3.81366	3.4345	4.15	4.08839	5.29856	4.78025	4.86781	5.13279	4.15448	3.68366	3.85205
28		5.68515	0.31398	5.29882	0.415588	4.04711	0.124381	4.38705	0.21441	4.58903	0.262944	5.9431	0.385147		7.33731	4.19185	5.41312	7.35693	4.00352	3.13494	5.30067	5.29085	5.46841	6.61154	4.17787		4.12039	4.16048	4.41388	3.7284	3.81238	4.05429	3.51259	5.54545	6.11784		5.28571	3.5882	3.3283	4.12561	3.97156	5.40354	4.89954	5.17626	5.11201	4.22693	3.68313	3.84384
29		5.66046	0.314415	5.35061	0.394888	4.07599	0.152543	4.35214	0.202195	4.58668	0.240442	5.83589	0.356556		7.08035	4.42031	5.83417	7.269	3.92301	3.27665	5.57218	5.46441	5.20381	6.62139	4.19143		4.37439	4.19572	4.38649	3.72013	3.70321	3.92874	3.44661	5.83014	6.09723		5.32792	3.57205	3.37898	3.98354	4.06533	5.24738	4.60959	5.08813	5.01355	4.45933	3.5628	3.91712
30		5.55979	0.320253	5.2414	0.386969	4.07592	0.146903	4.35227	0.218075	4.59096	0.226388	5.74256	0.363775		7.02068	4.37013	5.65898	7.52235	3.73339	3.3676	5.30441	5.31254	5.18176	5.9064	4.27711		3.96451	4.34487	4.49239	3.85478	3.72306	4.02327	3.35083	6.03748	5.02061		5.22565	3.51118	3.28356	4.11159	4.11376	5.49147	4.53196	5.18255	5.00994	4.38278	3.35681	4.02603
31		5.62554	0.338717	5.21682	0.418839	4.07377	0.113921	4.2721	0.194571	4.60026	0.221369	5.63757	0.335974		7.33174	4.31936	5.81615	7.7839	3.7026	3.50169	5.23037	5.21831	4.78605	5.67699	4.0179		4.04871	4.35872	4.29458	3.91544	3.75142	4.20165	3.45548	5.67863	4.96394		5.14773	3.59068	3.24906	3.97012	4.16065	5.2664	4.24258	4.89119	4.9729	4.37252	3.48975	3.91164
32		5.53319	0.332006	5.10408	0.430771	4.08036	0.118107	4.19514	0.202589	4.61043	0.216547	5.5884	0.343191		7.37391	4.42621	5.52632	7.84054	3.4989	3.38409	4.96485	4.81695	4.80095	5.51865	3.99349		4.22617	4.32725	4.20633	3.97335	3.66871	4	3.35296	5.79745	4.63168		4.85633	3.51863	3.10674	3.90671	4.00769	5.31627	4.1895	4.8723	5.04065	4.19686	3.3279	4.00205
33		5.5223	0.342772	5.07701	0.390779	4.0633	0.120122	4.18715	0.20783	4.62989	0.263356	5.58403	0.303479		7.14956	4.30283	5.49531	7.36587	3.53366	3.36844	5.19297	5.21966	4.99762	5.2076	4.01356		4.29506	4.20831	4.13694	4.06939	3.60681	4.0126	3.46258	5.7185	4.24276		4.90422	3.49876	3.04906	3.76341	4.0661	5.05381	4.04338	5.2518	4.98013	4.38346	3.52286	3.72877
34		5.4753	0.330458	4.95724	0.325836	4.01764	0.0915404	4.22352	0.207076	4.69894	0.276958	5.53056	0.323462		6.74702	4.36659	5.0757	6.56185	3.67356	3.3198	5.32012	5.14983	4.67223	5.50035	4.14262		4.0682	4.26243	4.01643	4.04642	3.69471	4.2443	3.31004	5.75279	4.33548		4.85227	3.5882	3.06199	3.69939	4.10607	5.12927	4.39441	5.01709	5.17886	4.42105	3.44877	3.78493
35		5.51202	0.32778	4.92208	0.333994	3.90938	0.093767	4.22192	0.21761	4.70647	0.258274	5.42332	0.343799		6.80827	4.13459	5.21341	6.51863	3.54026	3.41497	5.01421	5.12542	4.77831	5.56439	4.03037		3.90884	4.12209	3.92453	4.02436	3.56711	4.11924	3.32352	5.73923	4.43271		4.76867	3.59814	3.06361	3.64024	4.26902	5.32283	4.01484	5.15288	5.19693	4.38961	3.44561	3.80068
36		5.45236	0.332703	4.98158	0.34406	3.93478	0.112337	4.18849	0.21389	4.71923	0.251571	5.41373	0.352409		6.87112	4.15584	5.19611	6.3532	3.46898	3.46404	5.19447	5.1722	4.77414	6.10063	4.04664		4.19555	4.11328	3.80523	3.98943	3.57042	3.8856	3.22845	5.67943	4.03799		4.78247	3.57143	3.03288	3.62622	4.26287	4.96719	3.99087	5.14478	5.31707	4.3691	3.39149	3.80548
37	180	5.46374	0.334746	4.86633	0.328103	3.95377	0.152353	4.10561	0.211947	4.74693	0.240432	5.40309	0.362773		6.77168	4.15584	4.88248	6.16319	3.35636	3.45262	5.42932	5.08271	4.41657	5.67628	4.14262		4.20251	4.31215	3.88558	3.93336	3.43526	4.00194	3.33381	5.80463	4.42305		4.58523	3.56646	2.93585	3.67988	4.11914	4.92126	3.52454	5.02518	5.31527	4.3363	3.48765	3.77055
38		5.41548	0.347447	4.7862	0.329128	3.94433	0.168893	4.13572	0.199786	4.76277	0.236113	5.38801	0.361847		6.70724	3.95927	4.50469	6.00447	3.26001	3.45178	5.46223	5.15051	4.55066	5.58058	4.01681		4.14683	4.41787	3.81254	3.93658	3.40784	4.16626	3.1873	5.41866	4.3226		4.64854	3.59441	3.06792	3.78963	4.0269	5.00591	3.55879	4.68255	5.33875	4.46206	3.44088	4.01233
39		5.40081	0.355015	4.82145	0.332336	3.90923	0.154646	4.10863	0.214975	4.828	0.238927	5.33901	0.354509		6.6961	4.13105	4.44268	6.0462	3.30092	3.41667	5.38295	5.07661	4.35518	5.95496	4.23265		4.09116	4.30963	3.80889	3.94991	3.38658	4.09889	3.33913	5.45774	4.43335		4.63474	3.6646	3.06307	3.68293	3.9754	5.16798	3.59874	4.49011	5.44444	4.49282	3.19968	3.88904
40		5.42264	0.359666	4.77979	0.337262	3.88725	0.139031	4.14397	0.209943	4.81694	0.245241	5.26016	0.400432		6.58313	3.87662	4.35112	6.09463	3.09371	3.54188	5.23934	5.17356	4.5149	5.94018	4.16866		4.09882	4.16803	3.94522	3.84467	3.37949	4.27145	3.16247	5.20734	4.70316		4.70779	3.69006	3.1558	3.80854	4.00384	4.99606	3.39326	4.68705	5.46432	4.46958	3.28008	4.07123
41		5.45389	0.376305	4.7648	0.347464	3.84242	0.164511	4.10112	0.207729	4.82157	0.237741	5.28572	0.375801		6.40811	3.89847	4.062	5.96498	3.15222	3.49281	5.31414	5.21966	4.38439	6.38424	4.13178		4.09534	4.16237	3.84601	3.8773	3.2311	4.08677	3.0901	5.03748	4.50419		4.52597	3.60248	3.11644	3.73841	3.95772	4.94882	3.44349	4.74281	5.45257	4.3445	3.26695	4.07329
42		5.50665	0.382657	4.71002	0.310066	3.92408	0.177786	4.07532	0.20663	4.79763	0.222737	5.29349	0.379455		6.00875	3.79811	4.18673	5.80775	3.22833	3.60871	5.28497	5.16881	4.31168	6.19916	4.20716		4.25818	4.33417	3.90262	3.77574	3.34972	4.29666	3.15005	5.19378	4.59884		4.50974	3.6236	3.06954	3.69878	3.96925	4.81102	3.31849	4.92266	5.34508	4.37047	3.35418	3.91096
43		5.60766	0.386231	4.64067	0.301134	3.85236	0.211453	4.10042	0.212367	4.75415	0.228355	5.32334	0.365452		5.77327	3.83766	4.02956	5.80924	3.05323	3.60745	5.14734	5.11119	4.4267	6.05489	4.19685		4.24774	4.42102	3.67985	3.64568	3.26749	4.28648	2.91557	5.27911	4.7508		4.60958	3.59255	3.03935	3.78659	3.97079	4.79331	3.34361	5.00719	5.39024	4.32262	3.32528	4.02397
44		5.59675	0.383019	4.60349	0.293766	3.82096	0.170548	4.13311	0.212829	4.77709	0.22508	5.26574	0.373569		5.73906	3.91913	3.86301	5.50522	3.13902	3.58037	5.22064	4.87525	4.38558	6.19423	4.21692		4.19415	4.23159	3.70116	3.62868	3.34924	4.52545	3.03654	5.41786	4.91887		4.41883	3.61242	2.98652	3.64512	3.8824	5.08136	3.57078	4.93345	5.39476	4.39645	3.43826	4.23699
45		5.64219	0.374012	4.61067	0.292248	3.77045	0.187262	4.08947	0.213242	4.75568	0.197228	5.3659	0.363991		5.56802	4.14109	3.80678	5.42101	3.1355	3.47335	5.15557	5.21153	4.33194	6.22801	4.24458		4.10926	4.30963	3.59038	3.52114	3.32183	4.24527	3.05286	5.42743	4.79524		4.39042	3.59379	3.0124	3.60061	3.91622	5.14567	3.46804	4.78058	5.38663	4.32399	3.36837	4.08699
46		5.68351	0.373306	4.60652	0.294198	3.65767	0.203661	4.05206	0.212402	4.76185	0.18329	5.39214	0.386478		5.57279	4.33294	4.0173	5.20343	3.01452	3.57318	5.30965	5.12	4.09297	6.3216	4.11334		3.99652	4.25425	3.43457	3.46783	3.13516	4.41735	3.21	5.42982	4.75467		4.44886	3.62795	2.98113	3.50366	3.97463	5.08202	3.28995	4.58723	5.31888	4.40875	3.34209	4.05959
47		5.67264	0.378083	4.53474	0.299892	3.67338	0.210755	4.08583	0.220888	4.73657	0.187735	5.40323	0.386932		5.65155	4.24026	3.71233	5.12668	2.85702	3.55711	5.29993	4.99458	4.22706	6.15975	4.05586		4.09951	4.18943	3.56908	3.45267	3.05624	4.4668	3.1983	5.61324	5.14617		4.47403	3.64161	2.93962	3.48537	3.99001	4.99147	3.43322	4.88219	5.5131	4.1326	3.38991	4.15685
48		5.72815	0.379689	4.52448	0.288581	3.65834	0.189285	4.11714	0.235113	4.69631	0.177677	5.45118	0.395649		5.54336	4.13577	3.81399	4.95306	2.88077	3.51311	5.2012	5.09424	4.22408	6.14286	4.26681		3.94085	4.18943	3.54595	3.52711	3.08837	4.52254	3.26676	5.83892	5.11719		4.56981	3.47329	2.86577	3.44878	4.08609	5.04068	3.61701	4.66367	5.71996	4.33971	3.32685	4.25411
49	240	5.74121	0.36193	4.48819	0.279465	3.61709	0.196684	4.09965	0.239424	4.69028	0.196401	5.46173	0.386643		5.20446	4.13932	3.75198	4.83681	3.11879	3.57234	4.9454	4.92678	4.07747	6.48276	4.31399		4.09743	4.04909	3.42605	3.42923	3.08365	4.54968	3.32494	5.30781	5.23567		4.63718	3.46708	2.86792	3.58232	4.04535	5.11024	3.59418	4.77158	5.74345	3.9959	3.29427	4.0863
50		5.76359	0.371725	4.46446	0.317798	3.63854	0.197669	4.0309	0.226076	4.71639	0.194246	5.52472	0.432668		5.4821	3.9634	3.46647	4.72057	2.94941	3.53257	5.15632	4.94712	4.0447	6.62139	4.22505		4.15379	4.01573	3.49726	3.45221	3.07372	4.76636	3.27208	5.64753	5.18609		4.56737	3.40621	2.80863	3.5939	3.96618	4.66142	3.35388	4.66367	5.68564	4.06357	3.42775	4.1726
51		5.8225	0.381536	4.51651	0.30947	3.54349	0.187057	4.04897	0.24607	4.71811	0.193417	5.57736	0.45504		5.5179	4.04191	3.32877	4.85469	3.16938	3.54865	5.08751	5.20407	4.13468	6.52287	4.27115		4.04384	3.87099	3.29154	3.49311	3.01796	4.70092	3.39589	5.81738	5.04379		4.64854	3.39938	2.72776	3.63171	3.87241	4.74409	3.31621	4.92536	5.75971	3.96172	3.34524	4.25548
52		5.83544	0.387623	4.50369	0.310171	3.52554	0.201926	4.03145	0.243371	4.69405	0.162893	5.54865	0.446076		5.48051	4.02184	3.42826	4.96349	3.03256	3.57699	5.02244	4.92881	4.25328	6.60521	4.22722		4.12039	3.85085	3.26841	3.38097	3.00709	4.67281	3.36148	6.18182	4.71603		4.46916	3.25155	2.74825	3.57744	3.804	4.73688	3.45434	5.0045	5.68473	3.91114	3.3505	4.38493
53		5.93351	0.404397	4.56143	0.316701	3.53821	0.224419	4.01351	0.253996	4.68003	0.143631	5.63241	0.453345		5.68656	4.05077	3.35761	5.05365	3.14694	3.48689	5.29319	5.25424	4.2503	6.40746	4.18818		4.18163	3.94273	3.23372	3.34053	2.99244	4.79884	3.43207	6.09649	4.7302		4.51705	3.23478	2.76334	3.52622	3.701	4.87598	3.27911	4.81385	5.81572	3.84211	3.38203	4.41096
54		5.92674	0.40201	4.56662	0.316564	3.47468	0.222791	3.97044	0.241389	4.66897	0.148447	5.64375	0.469598		5.76054	3.84711	3.64888	5.17809	3.07391	3.46743	5.18474	4.87593	4.28546	6.52569	4.38503		4.10995	3.86155	3.20816	3.30055	2.89319	4.78429	3.38205	6.08373	4.79008		4.375	3.27826	2.78976	3.47805	3.63643	4.92782	3.26541	4.59173	5.7028	3.7136	3.47819	4.40822
55		6.00682	0.4162	4.60818	0.307012	3.42634	0.215609	4.01647	0.261422	4.67921	0.139879	5.69168	0.471993		5.68815	3.98524	3.57318	5.22951	3.1641	3.42724	5.22438	5.05695	4.49404	6.41168	4.43547		4.04871	3.78729	3.26963	3.16452	2.86153	5.03781	3.43703	6.20813	4.70702		4.42938	3.2354	2.8345	3.39817	3.58109	4.81234	3.32078	5.0027	5.81481	3.6972	3.38571	4.68562
56		5.96133	0.397675	4.59252	0.320817	3.39494	0.235943	4.05234	0.260413	4.62947	0.145915	5.63916	0.445202		5.72633	3.83707	3.39798	5.26304	3.1861	3.3714	5.40464	5.01627	4.45709	6.39409	4.46367		4.04106	3.8219	3.26172	3.08961	2.7604	4.95201	3.50692	6.33812	4.68448		4.38718	3.34907	2.87008	3.40183	3.44658	4.89895	3.45434	4.96763	5.79042	3.68968	3.45927	4.91301
57		5.99771	0.415162	4.55649	0.318384	3.39258	0.242361	4.03417	0.264168	4.64123	0.148402	5.70343	0.436545		5.56881	3.72432	3.3403	4.96274	3.23669	3.37944	5.32236	4.95051	4.51013	6.53554	4.59056		4.07237	3.80931	3.29884	3.00827	2.7741	5.2031	3.47925	6.5303	4.71024		4.50406	3.33913	2.8566	3.31585	3.49808	4.95801	3.25913	4.85162	5.73984	3.71975	3.42827	4.93973
58		5.9718	0.39292	4.55146	0.308222	3.3564	0.247711	4.09808	0.271158	4.61129	0.137053	5.66345	0.441701		5.39539	3.93625	3.38212	4.81595	3.22129	3.31726	5.31638	5.24068	4.61025	6.4335	4.39696		4.09395	3.68408	3.31771	2.99724	2.68904	5.20601	3.35119	6.30463	4.8152		4.51867	3.39068	2.84474	3.30244	3.39969	5.31037	3.73973	4.93076	5.68202	3.57963	3.4556	5.0226
59		6.04002	0.397033	4.59747	0.312462	3.29184	0.213366	4.10771	0.258137	4.62917	0.124823	5.74532	0.449122		5.50199	4.0366	3.40952	4.65499	3.28421	3.29907	5.37921	5.13424	4.70203	6.5651	4.60521		3.93598	3.62303	3.17407	2.90947	2.81664	5.0858	3.36715	6.24801	4.8255		4.59903	3.37826	2.89542	3.3689	3.38893	5.15551	3.89384	4.67536	5.77236	3.65687	3.5444	4.9637
60		6.09855	0.387252	4.59661	0.312029	3.20847	0.178609	4.11083	0.275875	4.63845	0.126466	5.7616	0.414305		5.37629	4.02538	3.43043	4.54471	3.27717	3.17809	5.46672	5.2278	4.98749	6.42716	4.62148		3.72512	3.45437	3.21302	2.91544	2.7344	5.09501	3.34977	6.46093	4.87572		4.60227	3.46335	2.82049	3.3122	3.29362	5.23556	3.99886	4.84532	5.84011	3.44566	3.48345	4.98904
61	300	6.13017	0.395497	4.62627	0.307176	3.18545	0.188481	4.10748	0.288075	4.60155	0.118163	5.6754	0.41885		5.58791	3.97875	3.55516	4.49851	3.33788	3.3291	5.36799	5.23119	4.99583	6.48768	4.51898		3.75017	3.4506	3.14912	2.83915	2.73819	4.98837	3.45371	6.63158	4.95428		4.55438	3.37019	2.83612	3.18415	3.299	5.21391	3.8984	4.73741	6.06414	3.51743	3.54335	5.07123
62		6.23516	0.408765	4.6862	0.307222	3.1486	0.209968	4.09334	0.277409	4.59013	0.109698	5.71855	0.40714		5.56961	4.11216	3.61932	4.72802	3.41443	3.37098	5.45924	4.96203	4.99762	6.68895	4.62581		3.81559	3.31655	3.17833	2.84651	2.58601	5.10955	3.5917	5.96332	5.02704		4.53896	3.38199	2.78113	3.23476	3.31899	5.16535	3.93379	4.68795	5.96296	3.49487	3.63163	4.98767
63		6.25307	0.394259	4.63649	0.306508	3.10334	0.199477	4.0919	0.282916	4.59896	0.111882	5.75404	0.416103		5.35481	3.93329	3.62004	4.62221	3.37703	3.38536	5.49888	5.19932	5.01132	6.60591	4.39317		3.73834	3.1888	3.1972	2.84605	2.54631	5.15754	3.62788	6.32297	5.24662		4.47159	3.4646	2.85067	3.00427	3.18524	5.03675	4.05537	4.89029	6.06504	3.65892	3.56122	4.8589
64		6.21462	0.403086	4.67542	0.305909	3.15522	0.195009	4.0335	0.295557	4.55881	0.107703	5.84344	0.414112		5.50119	4.13282	3.69935	4.44858	3.30532	3.38071	5.47345	5.21966	5.2646	6.52991	4.47397		3.72512	3.34047	3.26172	2.82169	2.62713	5.10567	3.60624	6.09171	5.42885		4.34253	3.41615	2.79084	2.94268	3.18447	5.33333	4.01769	4.60072	6.0542	3.47779	3.3526	4.88904
65		6.22925	0.375844	4.61865	0.319174	3.19006	0.217301	4.04057	0.303177	4.57849	0.137816	5.82726	0.428235		5.48846	4.02893	3.46431	4.49329	3.27629	3.31007	5.48616	4.93085	5.13826	6.64673	4.54176		3.81837	3.41913	3.3098	2.75368	2.64934	5.21183	3.65307	6.0319	5.31165		4.42614	3.35404	2.7558	2.88171	3.0515	5.28937	4.21062	4.48381	6.07498	3.54204	3.39832	5.01849
66		6.27858	0.381286	4.65468	0.323644	3.16875	0.210414	4.00659	0.304259	4.49535	0.134416	5.85153	0.458471		5.45585	4.05431	3.41024	4.50894	3.40475	3.29272	5.40613	4.90644	5.34386	6.75932	4.65889		3.78775	3.25425	3.4017	2.72564	2.67439	5.22395	3.58212	6.41228	5.47843		4.37013	3.48075	2.731	2.71829	3.0246	5.00262	3.97032	4.8804	6.08853	3.4607	3.42985	4.92192
67		6.21855	0.376483	4.63395	0.31642	3.11583	0.205141	3.91548	0.291965	4.5268	0.133841	5.7925	0.446625		5.44232	4.08855	3.35833	4.5924	3.38539	3.26227	5.4555	4.74847	5.57569	6.48205	4.58243		3.74948	3.14349	3.32988	2.75046	2.60586	5.10034	3.73856	6.26156	5.54797		4.28571	3.45093	2.71051	2.64695	3.0515	4.99672	3.89612	4.77518	5.8654	3.37457	3.23016	4.70205
68		6.2657	0.393369	4.67631	0.328291	3.13358	0.20007	3.9479	0.288962	4.47135	0.134544	5.86051	0.4462		5.51074	3.96399	3.40375	4.40909	3.4901	3.24788	5.49813	4.89424	5.73242	6.59324	4.69577		3.70007	3.28257	3.32988	2.71783	2.63752	5.23461	3.78787	6.2512	5.60721		4.32305	3.44472	2.6965	2.65854	3.20061	4.88255	3.94406	4.79496	5.96658	3.37936	3.39622	4.68767
69		6.26193	0.395772	4.73226	0.332821	3.13643	0.224683	3.94676	0.295628	4.47743	0.114813	5.82001	0.472722		5.39379	4.09032	3.33021	4.63264	3.46326	3.31387	5.42034	4.96678	5.7938	6.74525	4.90456		3.73486	3.40592	3.31406	2.63327	2.59405	5.11779	3.8503	6.33174	5.72569		4.35633	3.46584	2.73046	2.64939	3.05073	4.72769	3.8339	4.92626	6.028	3.44019	3.38045	4.77192
70		6.3603	0.387329	4.66682	0.331751	3.08673	0.195782	3.89467	0.295463	4.47994	0.125367	5.85149	0.472811		5.29356	3.85832	3.25883	4.44337	3.57589	3.40778	5.34779	4.74983	5.81466	6.77481	4.8102		3.5936	3.23222	3.34997	2.62224	2.63563	5.04023	3.72082	5.86603	5.8622		4.23052	3.44161	2.70189	2.55366	3.03228	4.75	4.04338	4.48831	6.02529	3.35475	3.26642	4.84795
71		6.41344	0.391969	4.58799	0.338972	3.05696	0.23119	3.8912	0.295507	4.46465	0.149005	5.89365	0.493305		5.0891	4.02893	2.80101	4.52683	3.56005	3.3253	5.28646	4.87661	5.40882	6.81422	4.75054		3.68267	3.23789	3.32197	2.50919	2.53308	5.16869	3.84143	6.02153	5.77077		4.12987	3.39503	2.6345	2.62378	3.01998	4.88976	4.00171	4.66637	5.90696	3.32262	3.26747	4.8363
72		6.3892	0.388532	4.54597	0.320246	3.13498	0.214774	3.84176	0.293913	4.46224	0.126306	5.94621	0.486802		4.94272	3.92326	2.99207	4.84203	3.51694	3.26354	5.02393	4.6922	5.4702	6.64462	4.69414		3.69381	3.37193	3.34632	2.59743	2.66541	5.43771	3.73076	5.78628	5.8255		3.95455	3.33292	2.67493	2.59451	2.83397	5.03871	3.71975	4.63399	5.68383	3.41763	3.26905	4.94726
73	360	6.40687	0.386178	4.64614	0.335314	3.16293	0.212272	3.88973	0.303963	4.48071	0.157954	5.94411	0.484506		5.44312	3.97226	3.13915	4.6997	3.61989	3.13875	4.99626	4.79254	5.80751	6.68543	4.81291		3.73347	3.3562	3.3871	2.66774	2.67013	5.67135	3.8017	5.82855	6.19317		3.95536	3.41801	2.7407	2.50305	2.94005	5.04528	3.76712	4.69964	5.82385	3.38893	3.2927	5.10205
74		6.5104	0.399206	4.65583	0.336946	3.1949	0.216003	3.84105	0.302016	4.49285	0.154999	5.92827	0.514791		5.6253	3.90555	3.15285	4.80328	3.61065	3.24619	5.18549	4.65356	5.66567	6.7354	4.63015		3.77035	3.44242	3.37797	2.71599	2.66777	6.03635	3.85988	5.69298	6.08435		3.68912	3.26149	2.73639	2.65427	2.93236	5.14698	3.67979	4.48112	5.76784	3.30212	3.27325	5.16781
75		6.56442	0.396745	4.67474	0.329344	3.24047	0.219093	3.86947	0.30367	4.53162	0.156344	5.95431	0.466119		5.34845	3.89433	3.20908	4.82116	3.7004	3.23731	5.14286	4.71864	5.79857	6.7178	4.83351		3.82185	3.39648	3.521	2.75322	2.70983	6.02908	3.81731	6.20494	6.42885		3.68344	3.30435	2.75741	2.64878	3.04304	5.26837	3.68836	4.48651	5.85727	3.46343	3.16763	5.06507
76		6.60269	0.421567	4.67367	0.32805	3.25332	0.201782	3.75942	0.291515	4.55228	0.164711	5.97975	0.519057		5.06523	3.8778	3.1168	4.75112	3.65684	3.39044	5.15482	4.81288	5.85876	6.7164	5.00922		3.79749	3.38767	3.50213	2.85386	2.72543	5.80999	3.93402	6.22727	6.49195		3.57386	3.30435	2.7186	2.80854	2.9216	4.98228	3.33562	4.2455	5.74435	3.37662	3.02154	5.08014
77		6.62294	0.430614	4.70615	0.353753	3.26565	0.217815	3.78125	0.300655	4.56429	0.182541	5.93995	0.504188		5.1957	3.9144	3.09733	4.70715	3.51386	3.3401	5.20045	5.06169	5.80453	7.03167	4.90076		3.80654	3.34298	3.64516	2.83226	2.70132	5.492	3.77829	6.0327	6.47328		3.58442	3.15528	2.65768	2.76951	2.98463	4.97047	3.45205	4.21133	5.80939	3.36022	3.15765	5.26233
78		6.54135	0.436541	4.7126	0.340003	3.31398	0.252956	3.80385	0.300909	4.52949	0.204162	5.96916	0.498481		5.3922	3.82881	3.29344	4.80849	3.64496	3.45601	5.06208	4.74983	5.99821	6.93807	4.66649		4.01461	3.46759	3.60438	2.85524	2.62807	5.06156	3.79638	6.07257	5.82421		3.52516	3.11801	2.78329	2.82927	2.90546	5.05971	3.47831	4.15018	5.83198	3.4853	3.18917	5.29041
79		6.62173	0.439476	4.70368	0.334927	3.35494	0.255181	3.7786	0.305909	4.54401	0.222493	6.00041	0.518568		5.15434	3.70897	3.12617	4.90611	3.6784	3.46193	5.22438	4.98305	5.82479	6.79873	4.87364		4.00835	3.53367	3.70237	2.88143	2.64887	4.90742	3.78645	6.19219	5.86091		3.18263	3.11056	2.70081	2.79268	3.10607	4.90289	3.48916	3.82464	5.82204	3.45181	3.39622	5.5637
80		6.54836	0.448914	4.6803	0.358817	3.41458	0.246807	3.76988	0.303289	4.5247	0.218461	6.01911	0.521263		5.07399	3.66942	3.02668	4.42176	3.58293	3.53849	5.04787	5.05492	6.01788	7.02393	5.02549		4.14196	3.56388	3.63847	2.93888	2.7897	3.74212	3.78148	6.22329	5.47135		3.14529	3.00435	2.74771	2.87378	2.99154	4.9731	3.46404	4.24191	6.00452	3.36569	3.3773	5.04932
81		6.5603	0.449227	4.6361	0.357489	3.43928	0.232822	3.71881	0.275914	4.51319	0.230402	5.92142	0.521899		4.83532	3.55018	3.06777	4.46125	3.65332	3.51481	4.81451	5.00814	6.0149	7.06826	5.00868		4.03201	3.66583	3.70724	2.99219	2.79915	3.88512	3.67542	5.94657	5.35995		3.15828	3.10186	2.83019	2.74817	2.93774	5.15026	3.67865	4.31475	5.69467	3.22488	3.44719	4.33904
82		6.70134	0.424314	4.60489	0.34759	3.45922	0.226148	3.69222	0.290298	4.52062	0.214021	5.89497	0.516178		5.04375	3.52715	2.90195	3.99776	3.70744	3.51184	5.24233	4.97559	6.08641	6.51091	5.14859		4.06402	3.70925	3.64942	3.01517	2.85822	2.99758	3.79816	6.2496	5.04765		3.14042	3.04472	2.89003	2.76159	2.95311	5.29331	3.39726	3.8714	5.85456	3.0663	3.57909	4.45479
83		6.63414	0.419105	4.50686	0.339683	3.51215	0.255915	3.76017	0.272762	4.50501	0.240587	5.88649	0.497888		4.86078	3.26682	3.15573	3.70715	3.67532	3.46827	4.95064	4.95322	6.15971	6.34905	5.02874		4.16841	3.79043	3.76446	3.04871	2.78875	2.6825	3.75417	6.19617	5.3329		3.23539	3.10248	2.91914	2.78171	3.21445	5.17388	3.40468	3.98022	5.62782	3.25222	3.57593	4.85411
84		6.73724	0.435844	4.52976	0.366606	3.50908	0.266857	3.72242	0.252933	4.51089	0.233551	5.69494	0.449245		5.12013	3.03247	3.16583	3.86066	3.69424	3.56853	4.64547	5.01763	6.22586	6.78888	4.7077		4.21921	3.78477	3.75472	3.00597	2.78072	2.96995	3.85633	5.58214	5.28397		3.27273	3.18758	2.94447	2.92256	3.20138	5.20604	3.26084	3.97212	5.54652	3.36227	3.42407	4.36849
85	420	6.67797	0.418002	4.45786	0.345554	3.52487	0.290771	3.70378	0.2562	4.49595	0.242303	5.63601	0.43123		4.98488	3.1222	3.06273	3.538	3.70656	3.64721	4.81601	4.88203	5.96126	6.55524	4.7603		4.31246	3.86029	3.71637	3.03722	2.69802	3.98546	3.79993	5.55024	4.24082		3.35308	3.17453	3.01887	2.81098	3.2867	5.24672	3.21689	3.96942	5.68383	3.36227	3.44666	3.87534
86		6.62295	0.418033	4.51058	0.364428	3.53498	0.285333	3.65456	0.251958	4.49032	0.237493	5.64424	0.406719		5.1074	3.0608	3.03172	3.89866	3.63308	3.56514	4.78534	5.01695	6.21752	6.67065	4.62907		4.26862	3.78351	3.84297	3.11489	2.66493	4.36985	3.97552	5.34131	4.46748		3.11364	3.1236	2.90512	2.83537	3.22367	5.20538	3.12443	3.96043	5.49503	3.35338	3.52496	3.98973
87		6.57258	0.426322	4.54099	0.366871	3.56825	0.283605	3.66914	0.241671	4.44198	0.230282	5.57816	0.41289		5.3031	3.1588	3.13699	3.89493	3.43291	3.55668	4.90052	4.85424	6.47855	6.46305	4.77115		4.29158	3.90686	3.82288	3.05009	2.76985	3.86524	3.93934	5.4681	4.2801		3.34659	2.9472	3.00863	2.87378	3.37817	5.04462	3.06107	4.0045	5.52484	3.46411	3.50079	3.87534
88		6.61643	0.435407	4.40787	0.366387	3.56601	0.27493	3.66882	0.22362	4.42301	0.244086	5.49015	0.34982		5.25298	3.04191	2.67484	3.82191	3.55257	3.63959	4.63874	4.74373	6.28963	6.3589	4.4718		4.24078	3.79799	3.92696	3.11765	2.74669	3.67959	3.90387	5.57416	4.36896		3.43344	2.95839	3.03666	2.83049	3.40892	4.90157	2.97146	4.09083	5.1626	3.40533	3.54808	4.27808
89		6.49951	0.41574	4.42013	0.377953	3.59618	0.318379	3.61943	0.222075	4.40237	0.249458	5.51034	0.366748		5.21798	2.7987	2.8075	3.4538	3.75627	3.6599	4.40763	4.83458	5.91716	6.65728	5.11063		4.42102	3.83071	3.97931	3.10386	2.64603	4.20116	4.0078	5.4362	3.89826		3.37094	2.92857	3.04582	2.93598	3.2721	4.85564	3.06336	4.22392	5.27642	3.40055	3.6742	3.38562
90		6.42691	0.411066	4.37398	0.346783	3.57551	0.289231	3.56032	0.213299	4.44743	0.249404	5.42436	0.362496		4.98966	2.79457	3.02307	3.50075	3.55609	3.73393	4.37771	4.89085	5.99404	6.20056	5.0526		4.26583	3.83134	3.9647	3.11765	2.69802	3.75763	3.82795	5.40191	3.81198		3.37581	3.04472	3.04313	2.82866	3.35127	4.75459	2.9218	3.8795	5.24661	3.50513	3.47609	3.29658
91		6.41136	0.422515	4.16962	0.367038	3.57978	0.285338	3.50244	0.197528	4.41473	0.259222	5.28071	0.342687		5.03739	2.82645	2.7181	2.77049	3.28949	3.57318	4.19596	4.50508	5.97914	5.81492	5.15564		4.26026	3.7747	3.986	3.2045	2.67344	4.10034	3.86946	5.40431	3.88603		3.46266	3.06957	2.90943	2.93598	3.12298	4.49278	2.98687	3.60791	5.19332	3.42584	3.35891	3.46301
92		6.39973	0.412031	4.1684	0.369592	3.61384	0.310629	3.45615	0.198573	4.36003	0.279692	5.38482	0.342521		5.08115	2.76387	3.08363	2.86215	3.11439	3.4357	4.29319	4.13288	6.0435	6.0197	5.02223		4.46207	3.76841	3.96774	3.20083	2.67013	4.05768	3.95637	5.26077	3.74437		3.40909	2.95839	3.00755	2.97073	3.06764	4.40354	2.99829	3.36151	5.24842	3.35065	3.39727	3.30068
93		6.29814	0.414499	4.13996	0.359558	3.66238	0.342887	3.42945	0.171853	4.30872	0.27322	5.33148	0.357068		5.21002	2.77627	2.88104	2.90611	3.2952	3.31091	4.18474	4.13153	5.75387	5.82196	5.2679		4.47182	3.79358	4.23311	3.23162	2.58176	3.86185	3.67613	5.3748	3.96201		3.4164	3.08571	3.03127	2.91829	3.11991	3.96785	3.15011	3.33543	5.11382	3.40191	3.40515	3.20753
94		6.28099	0.392405	3.97271	0.345672	3.60509	0.356395	3.41428	0.174729	4.2763	0.261839	5.17992	0.365737		4.99761	2.76919	2.68133	2.22578	3.39595	3.29738	4.44278	4.18847	5.42968	5.27868	4.99295		4.43772	3.86595	4.09312	3.19531	2.43336	3.9365	3.48989	5.45375	4.37669		3.30682	3.23665	3.05067	2.89878	3.18678	3.82874	3.05365	3.21133	5.18428	3.2529	3.50867	3.25205
95		6.15359	0.399599	3.75646	0.347871	3.61305	0.336536	3.40412	0.181321	4.17686	0.273672	5.0995	0.390765		5.19809	2.65289	2.43547	1.91803	3.16322	3.42513	4.25505	3.68678	5.3242	4.93737	4.32484		4.29784	3.94147	4.12234	3.21921	2.4844	3.75182	3.44129	5.126	4.18995		3.39692	3.41801	3.11429	2.92134	3.05842	3.72572	2.7403	3.10162	5.20867	3.30622	3.42091	3.43699
96		5.99204	0.367047	3.53357	0.335984	3.61993	0.349291	3.29396	0.17143	4.09676	0.277124	4.99134	0.386118		4.90533	2.52479	2.33742	1.60209	3.14298	3.29992	4.17277	3.82237	5.20203	4.45883	3.40076		4.31733	3.97105	4.15642	3.20588	2.44896	3.61997	3.55339	5.29107	4.1745		3.29627	3.30311	2.69704	2.81585	3.06072	3.54003	2.85388	3.06205	4.98916	3.2905	3.47924	3.13973
97	480	5.7585	0.348709	3.46016	0.343936	3.67077	0.369568	3.28225	0.165228	4.05147	0.273845	4.79996	0.362985		5.36197	2.50472	2.60274	1.4769	2.89441	3.29569	3.90127	3.40949	5.21812	3.87966	3.51681		4.46625	4.01385	4.20024	3.23024	2.44329	2.39893	2.92409	4.9673	4.04507		3.25974	3.38882	2.7035	2.825	2.91468	3.65551	2.88642	2.89658	4.82565	3.32468	3.54545	3.16096
98		5.70241	0.35383	3.2553	0.289929	3.60278	0.34159	3.23644	0.131229	3.9405	0.270901	4.63081	0.343115		4.99523	2.30106	2.55732	1.58122	2.60757	3.25635	3.90426	3.08881	4.10072	3.82196	3.59382		4.47599	3.95846	3.86184	3.22656	2.49102		2.59986	5.0311			3.08279	3.3205	2.79461	2.92988	2.89239	3.53281	2.99829	3.22212	4.52575	3.2864	3.14766	3.10411
99		5.57994	0.343422	3.19297	0.274259	3.62536	0.365241	3.08675	0.102158	3.82738	0.265602	4.44774	0.339983		4.85919	2.33058	2.47008	1.60209	2.65552	3.28215	3.64772	3.22034	4.11442	3.78114	3.15944		4.45024	4.18188	3.88192	3.17417	2.43856		2.7563	4.92903			3.17451	3.32484	2.74825	2.79085	2.90853	3.30906	2.66838	3.19604	3.96658	3.13876	2.93852	2.87671
100		5.4282	0.327486	3.19225	0.306223	3.62438	0.393519	3.06885	0.0903274	3.74528	0.288407	4.3103	0.315301		5.17263	2.29516	2.56957	1.63189	2.45139	2.93697	3.45999	3.16475	4.46067	3.87192	3.09978		4.51775	4.1995	3.91296	3.15901	2.3327		2.08336	4.77033			3.22808	3.21118	2.84582	2.8561	2.81399	3.42257	2.98116	2.96942	3.70009	3.35954	2.74304	2.69521
101		5.27558	0.304357	3.06522	0.305845	3.53134	0.345451	3.17722	0.116067	3.62456	0.284097	4.22003	0.27272		4.99125	2.134	2.46359	1.45902	2.57017	2.82614	3.34555	3.0461	4.52086	3.52991	2.8308		4.29088	4.12964	3.67803	3.16544	2.39272						3.2776	3.0764	2.78598	2.84207	2.80477	3.51247	2.91553	3.58453	4.09937	3.06083	3.33421	2.83288
102		4.90251	0.250717	3.09261	0.287454	3.5177	0.360913	3.01268	0.125643	3.52007	0.284361	4.07671	0.26789		5.07876	2.16234	2.46575	1.63189	2.56357	2.7335	3.14884	3.26508	4.08343	3.64743	3.23807		4.33125	4.11957	3.69568	3.09513	2.34688						3.14042	3.00559	2.83181	2.59878	2.24212	3.8773	2.64498	3.24281	3.55104	3.12645	3.05045	2.84041
103		4.81647	0.220689	2.89881	0.283461	3.48144	0.359224	3.04194	0.135523	3.4419	0.270182	3.83921	0.197685		4.70963	2.18418	2.17952	1.30924	2.53498	2.76523	2.95812	3.11322	4.14541	3.33498	2.65239		4.30132	4.07426	3.6829	3.00138	2.34735						3.14205	3.17702	2.64528	2.44695	2.40507	4.05577	2.85331	3.2509	3.55014	3.00068	3.2186	2.75753
104		4.64366	0.248497	2.67703	0.261589	3.47875	0.361522	2.92788	0.113982	3.28323	0.168047	3.69247	0.178251		4.47335	2.09622	1.80894	1.25857	2.45051	2.66497	3.11743	2.65424	3.41955	3.19282	2.31074		4.16701	4.12775	3.77785	3.04182	2.2793						3.19562	3.16957	2.58383	2.54512	2.39277	3.6811	2.72032	3.02338	3.24119	2.98018	3.17551	2.42603
105		4.47973	0.259615	2.66961	0.267427	3.40339	0.329779	2.89107	0.122349	3.26305	0.175724	3.59824	0.192058		4.08512	2.12338	2.11896	1.17958	1.66608	2.49196	2.84144	2.88949	3.77592	3.50669	2.68709		3.94711	4.12524	3.60438	3.01838	2.32183						3.16802	3.20311	2.66361	2.49878	2.15142	3.73622	2.54281	2.98112	3.24571	3.03691	2.79664	2.66849
106		4.23136	0.256589	2.45861	0.246146	3.18834	0.270207	2.88784	0.123373	3.11835	0.190113	3.43931	0.139785		3.92045	2.10153	2.02884	1.0544	1.5143	2.43824	2.78085	2.55593	2.99225	3.41168	2.2462		3.57272	3.80491	3.41144	2.83456	2.31805						2.9862	3.10559	2.4027	2.52378	2.15142	3.56955	2.61929	3.05576	3.56911	2.95967	2.80347	2.90753
107		4.07533	0.272726	2.41541	0.242178	3.14624	0.295335	2.80418	0.113711	3.08636	0.156616	3.2973	0.150134		3.6428	2.07379	2.03965	0.926975	1.60053	2.39721	3.09798	2.15119	2.65614	3.51583	2.46746		3.72025	3.74512	3.29337	2.77206	2.20038						3.12013	2.9118	2.37358	2.3311	2.26287	3.60236	2.67009	2.95234	3.13008	3.02939	2.61429	2.65205
108		3.82077	0.261684	2.21323	0.260169	3.05857	0.243601	2.69464	0.124646	2.97176	0.134448	3.08715	0.161864		3.83373	1.84534	1.8522	0.949329	1.28641	1.59602	3.04039	1.87254	2.64482	3.05278	2.37202		3.32916	3.71554	3.12477	2.86489	2.25851						3.02922	2.84969	2.10836	2.4561	2.01384	3.34777	2.8282	3.04496	3.12918	2.86466	2.29585	2.36781
109	540	3.70454	0.301436	2.10018	0.260978	2.9942	0.248403	2.52817	0.147797	2.85976	0.113705	3.00023	0.202151		3.64439	1.87367	2.00649	0.871833	1.01892	1.43782	2.6006	1.92881	2.37366	3.35116	1.99458		3.32289	3.53744	3.26476	2.65211	2.19376						3.0414	2.63665	2.03881	2.07256	1.90161	3.21588	2.61473	3.00809	3.06143	2.84826	1.97057	1.92808
110		3.65561	0.315008	2.24926	0.291662	2.91514	0.260648	2.42353	0.173103	2.69758	0.121812	2.7627	0.197744		3.73031	1.85301	2.04614	0.895678	0.932688	1.55711	2.89454	2.08068	2.9708	3.64321	2.13774		3.43841	3.39585	3.13086	2.48346	2.12713						2.89448	2.64161	1.27655	1.85732	2.14681	3.13058	2.62557	3.08903	2.55827	2.99795	1.65055	2.2137
[truncated: 18 more columns]

## Sheet: E',G',I',K',M'.
Time(s)	WT	SEM	DPod1 shRNA	SEM	Coronin shRNA	SEM	Cortactin shRNA	SEM	Scar shRNA	SEM	Carmil shRNA	SEM
0	37.2248	2.23801	44.1524	3.07192	49.7178	4.34993	40.2199	2.0967	42.9137	3.28509	1.18657	0.0825562
60	189.709	13.7302	211.73	10.7039	172.767	9.83876	164.035	6.25327	161.196	6.39854	5.69013	0.287663
120	206.015	7.82294	232.157	9.118	192.995	5.9014	175.802	6.91383	187.584	8.99556	6.23909	0.245042
180	193.672	5.31974	205.854	4.39341	190.893	6.44071	160.942	4.75953	192.566	9.83077	5.53222	0.118071
240	203.071	5.54695	192.204	8.72283	179.983	6.75534	160.313	5.36266	188.801	5.94808	5.16539	0.234422
300	216.705	5.84632	197.936	9.61094	161.272	6.8481	160.938	8.53716	190.555	4.2457	5.31942	0.258289
360	227.718	7.55651	199.724	12.7147	160.251	6.76449	152.345	9.5386	186.595	6.15112	5.36748	0.3417
420	236.809	7.68193	193.824	15.8311	177.712	6.59025	146.023	8.6932	186.367	9.39575	5.20892	0.425454
480	204.502	5.93583	151.338	15.6208	171.994	8.79177	130.63	7.15922	168.117	9.82823	4.06712	0.419802
540	133.903	8.80607	88.3634	8.27244	140.677	6.05774	99.8724	5.40616	114.49	7.05944	2.37472	0.222318
	WT cycle 11 cap area
0	35.8237	30.3144	52.0022	38.6455	48.2129	37.3556	38.8605	44.0742	39.1561	24.3483	43.1067	44.4504	24.7514	23.5421	33.7275
60	233.351	179.656	135.851	116.743	238.269	260.602	205.482	229.213	220.425	194.437	234.023	228.487	125.45	87.2884	156.356
120	235.421	208.788	181.349	191.024	238.753	267.939	223.596	196.856	226.283	172.185	182.962	221.634	178.823	153.561	211.045
180	187.53	200.806	169.793	180.704	225.316	234.991	184.923	190.325	190.191	191.803	180.462	222.816	178.689	162.833	203.897
240	203.306	227.627	164.176	204.031	230.718	243.053	202.822	217.173	202.58	198.388	185.783	211.852	190.89	168.906	194.76
300	215.211	236.388	215.507	223.972	264.391	237.571	229.616	219.135	198.791	189.895	173.367	196.587	209.325	205.456	235.367
360	232.894	237.866	221.097	214.862	294.625	264.149	268.127	221.043	240.366	194.168	188.955	207.821	213.975	210.535	205.294
420	236.764	229.105	233.781	229.239	287.96	295.485	282.209	228.46	249.288	212.201	200.538	200.161	218.248	225.208	223.488
480	187.181	210.239	211.905	197.205	261.301	191.185	227.976	209.675	224.751	179.28	165.278	196.829	197.017	192.099	215.614
540	147.245	121.285	129.616	135.044	182.962	107.498	108.25	141.064	177.694	174.684	150.685	131.416	64.4719	79.9785	156.651
	DPod1 shRNA
0	33.7812	45.5254	37.2749	36.0656	61.0857	63.5313	35.9312	39.6399	45.0954	38.1887	49.5566
60	149.825	206.289	216.34	251.357	222.118	238.861	150.202	194.545	236.711	211.045	251.733
120	246.063	199.866	228.783	272.051	216.313	196.103	189.465	219.511	257.726	256.813	271.029
180	228.756	189.196	181.994	222.279	205.026	219.35	195.082	201.478	199.167	216.77	205.294
240	175.813	188.444	139.855	174.442	190.513	226.955	177.694	195.297	183.875	247.568	213.787
300	188.766	181.134	132.518	162.241	203.897	211.502	192.878	207.364	225.289	247.756	223.945
360	183.875	180.839	117.012	169.497	221.123	199.409	179.522	189.976	261.892	255.308	238.511
420	168.396	142.139	114.163	127.6	226.418	231.712	173.045	193.523	268.826	250.336	235.904
480	181.134	114.029	97.0169	53.2653	176.807	209.379	140.177	135.152	235.313	148.159	174.281
540	123.112	85.2997	74.7917	31.4432	62.2413	91.3464	93.4426	76.458	107.041	127.976	98.8444
	Coronin shRNA cycle 11 cap area
0	38.6187	42.7036	44.1548	58.4789	56.8664	55.4421	75.7592	33.7006	41.7361
60	169.874	131.954	164.015	195.754	185.273	161.166	206.477	210.508	129.884
120	167.401	179.844	182.693	211.234	213.169	189.503	204.765	175.732	212.618
180	162.295	184.144	171.567	230.019	195.351	191.876	202.567	195.619	184.601
240	158.237	172.911	151.277	200.538	175.356	182.244	181.895	178.877	218.517
300	144.827	147.353	139.049	166.031	155.711	176.565	161.65	153.488	206.772
360	144.182	143.322	149.557	156.006	151.841	174.432	158.014	156.426	208.479
420	166.541	164.848	164.096	177.614	153.427	220.962	187.88	187.047	176.995
480	172.481	171.406	185.461	188.901	138.941	133.002	221.527	167.401	168.826
540	128.326	151.062	144.155	155.093	124.751
	Cortactin shRNA
0	33.1094	43.2679	49.8522	44.0742	34.9637	40.9567	47.0841	29.8844	29.7501	39.3174	51.1422	39.2368
60	189.626	176.001	132.142	182.988	173.797	169.901	189.25	133.593	147.487	179.79	156.598	137.248
120	184.09	171.029	164.015	180.919	140.124	220.237	201.156	155.012	157.27	183.822	201.693	150.255
180	151.814	154.313	146.359	162.188	144.02	201.559	165.95	150.175	158.13	170.492	178.366	147.944
240	153.534	150.013	142.972	157.888	141.44	209.299	169.229	142.596	170.868	157.108	168.476	160.333
300	150.793	145.821	141.387	140.339	115.345	213.545	183.553	141.575	180.409	138.296	181.215	198.979
360	130.959	147.89	136.63	110.32	102.795	206.638	177.372	140.446	173.26	133.244	168.396	200.188
420	111.019	137.356	150.497	123.891	114.915	214.889	151.465	118.624	169.094	132.196	176.27	152.056
480	107.928	146.627	134.776	124.51	101.908	149.718	135.904	86.5628	143.564	130.718	181.322	124.026
540	100.699	114.082	101.639	91.3464	66.4875	131.712	123.112	89.8952	91.0777	111.986	100.779	75.6517
	Scar shRNA
0	70.9218	39.7743	34.5606	35.7431	29.1051	37.0868	46.8154	40.5267	46.0898	45.3373	46.0898
60	194.276	170.546	150.658	163.504	187.342	147.38	172.642	166.541	162.322	122.145	135.797
120	221.634	158.882	142.193	161.489	169.551	170.922	215.238	223.22	222.413	201.639	176.243
180	186.348	162.779	163.719	154.931	168.745	186.348	225.101	260.925	223.865	184.386	201.075
240	158.076	171.594	165.439	176.888	188.955	211.045	193.792	224.16	197.447	189.734	199.678
300	182.048	192.126	165.305	170.411	213.679	189.089	200.134	200.296	201.156	187.154	194.706
360	193.604	191.346	161.354	153.749	199.812	166.031	192.959	221.983	207.606	181.295	182.8
420	183.257	189.143	136.092	141.763	196.694	186.24	192.771	240.661	227.439	189.25	166.729
480	171.567	173.394	115.265	129.616	173.045	161.381	168.852	242.73	187.745	152.083	173.609
540	66.7025	126.713	90.2177	95.3239	129.078	102.553	133.405	146.52	125.101	113.787	129.992
	Carmil shRNA
0	26.9551	23.4883	31.8463	67.6162	45.7404	47.8366	34.1844	33.7275	33.5394
60	174.55	167.616	191.857	335.824	221.392	241.252	156.248	179.549	196.13
120	186.267	189.438	199.597	328.38	202.607	227.143	212.712	210.374	210.212
180	185.568	170.734	178.474	317.038	193.308	198.146	190.513	179.656	164.794
240	188.471	162.591	206.289	240.93	225.826	214.512	170.572	192.341	170.599
300	180.865	174.469	214.835	226.418	228.353	236.952	175.517	216.313	179.522
360	149.987	198.549	231.497	227.627	237.651	242.569	197.608	228.863	201.612
420	124.268	187.853	196.318	223.327	241.011	249.18	195.109	211.798	207.391
480	127.815	167.831	176.592	215.13	180.489	222.575	158.801	157.377	156.813
540	60.817	91.3464	81.2685	165.09	122.655	189.304	102.607	99.9731	109.299

## Sheet: E'',G'',I'',K'',M''.
cap average intensity	WT	SEM	DPod1 shRNA	SEM	Coronin shRNA		Cortactin shRNA		Scar shRNA		Carmil shRNA
0	2027.87	88.6705	535.8	37.92	1311.72	73.2858	1995.49	168.774	1934.84	48.9442	2197.86	115.817
60	2542.19	94.3652	522.519	47.2361	1630.81	115.965	2386.89	214.102	1967.99	105.473	2305.78	79.3057
120	2810.52	142.042	645.818	70.559	2244.3	126.731	3160.5	209.06	2470.91	105.36	2522.11	223.546
180	2822.94	135.374	714.246	79.6194	2550.63	115.425	3480.99	178.567	3039.29	130.243	2972.3	253.5
240	2503.05	93.2797	677.08	64.786	2108.27	113.66	3371.57	112.812	3108.11	121.201	2628.17	217.104
300	2322	41.2828	633.849	52.5595	1881.99	99.9068	3277.35	104.684	2839.51	115.597	2470.35	208.414
360	2243.99	39.3414	571.812	38.6612	1892.32	105.283	3085.48	83.7655	2661.32	101.597	2205.7	121.781
420	2166.03	190.639	546.533	36.8017	1919.34	67.0555	2896.66	69.6015	2601.25	95.9658	2100.03	183.757
480	2044.1	49.7619	512.75	39.5411	1746.81	110.659	2706.22	98.4461	2332.82	101.844	2298.15	147.114
540	1748.75	36.8543	562.388	61.3581	1809.36	109.259	2147.05	140.197	1948.56	146.735	2059.41	189.129
	WT
0	2016.42	1999.39	2256.01	2227.54	2424.63	2258.46	2522.35	1769.07	1636.92	1724.37	1642.12	1857.14	1057.49	1071.17	977.787
60	2185.34	2466.39	2314.24	2385.81	2118.56	2142.66	2462.03	2920.57	2827.85	2845.74	2817.98	3019.09	999.388	1006.51	940.577
120	2261.77	2368.41	2588.51	2446.39	2312.41	2363.54	2641.23	3381.74	3392.31	3460.24	3139.74	3369.91	1393.29	1235.92	1224.27
180	2486.76	2073.16	2731.06	2600.64	2343.96	2347.48	2831.7	3309.52	3249.91	3589.81	3124.87	3186.45	1420.07	1286.89	1256.49
240	2099.64	2031.78	2403.4	2245.86	2274.61	2280.15	2572.36	2716.42	2841.13	2966.78	2918.57	2685.88	1424.22	1432.27	1335.44
300	2129.77	2111.38	2238.51	2217.76	2231.68	2240.13	2493.62	2366.47	2498.48	2424.49	2487.84	2423.85	1325.76	1348.46	1231.52
360	2151.72	2099.42	2327.25	2295.74	2119.57	2236.17	2572.42	2231.78	2244.1	2307.78	2287.08	2054.8	1222.49	1219.16	1145.76
420	2400.6	2290.92	2574.94	2406.69	2198.64	2004.54	2319.27	1282.62	1195.94	1157.38	3221.61	2939.23	3177.51	3207.81	3144.23
480	2143.24	2201.99	2397.41	2227.12	1893.14	1802.34	2026.47	1921.41	1946.32	1996.57	2083.44	1889.79	1076.47	1062.24	998.811
540	1548.03	1735.36	1685.44	1641.39	1705.03	1872.12	1984.19	1680.01	1764.79	1730.95	1685.45	1952.27	894.095	880.85	824.171
	DPod1 shRNA
0	717.868	697.071	681.599	653.495	482.992	474.443	457.663	510.169	416.43	403.891	398.177
60	755.783	741.869	700.889	664.222	441.298	423.78	420.389	450.242	390.376	396.835	362.032
120	962.48	996.999	876.437	889.521	538.15	551.219	500.835	540.762	410.573	428.248	408.776
180	1031.01	1155.55	937.865	1005.57	612.188	592.34	558.874	607.667	447.918	448.885	458.84
240	974.587	868.502	924.322	993.101	581.497	559.738	547.745	582.915	491.67	456.2	467.606
300	894.574	915.886	794.713	739.429	569.195	579.135	568.903	565.158	446.556	456.244	442.548
360	793.598	740.159	726.452	559.675	544.737	548.055	546.831	538.493	430.187	432.91	428.836
420	710.858	623.615	807.239	523.083	522.873	505.5	521.916	519.925	427.859	417.679	431.32
480	751.999	771.094	524.487	489.742	483.054	483.502	475.18	482.709	398.014	397.339	383.133
540	974.276	770.319	681.674	758.937	492.002	486.304	445.122	484.349	375.382	364.239	353.671
	Coronin shRNA
0	1222.23	1662.71	1103.15	1393.5	1383.73	1456.42	1489.67	986.182	1107.9
60	1614.18	1663.76	1578.89	1634.13	2295.19	1795.61	1782.59	1262.8	1050.16
120	2037.65	2361.72	1983.92	2003.52	2871.58	2283.39	2000.16	2831.08	1825.73
180	2237.95	2745.8	2082.69	2252.59	2931.07	2828.74	2295.13	3028.36	2553.36
240	1971.14	2239.32	1923.05	2216.41	2511.99	2471.7	2280.42	1960.32	1400.06
300	1541.07	1947.45	1604.21	2046.48	2362.64	2087.05	2139.89	1618.8	1590.32
360	1522.07	1599.53	1760.56	2099.94	2183.61	2274.47	2279.41	1760.6	1550.66
420	1881.4	1913.3	1851.06	2133.93	2163.73	2160	1874.45	1599.26	1696.97
480	1870.49	1863.59	1808.75	1956.65	2293.9	1764.25	1634.15	1382.72	1146.81
540	1806.2	2185.34	1532.62	1851.25	1671.41
	Cortactin shRNA
0	2281.61	2563.25	2407.45	2513.9	2612.6	1915.23	2458.76	2193.04	1370.07	1360.98	1136.47	1132.51
60	2644.67	3206.45	2675.86	3141.38	3886.46	2012.63	2301.54	2204.56	1656.84	1724.08	1567.69	1620.56
120	3926.37	3308.36	3802.74	3689.46	4503.69	2722.08	3046.17	3301.2	2622.21	2596.22	2191	2216.49
180	4660.34	3520.98	4191.04	3725.4	4142.45	2940.12	3241.88	3401.39	3374.26	3292.55	2640.07	2641.38
240	4148.41	2895.6	3637.03	3699.06	3118.67	2950.89	3373.88	3533.14	3666.7	3450.47	2882.1	3102.86
300	3635.24	2686.23	3313.16	3083.65	3146.11	2989.85	3151.24	3613.06	3839.75	3794.35	2996.58	3078.97
360	3039.29	2517.35	3213.23	3101.09	3223.09	2744.92	2723.14	3272.69	3565.67	3260.25	3140.67	3224.36
420	2787.94	2686.95	3009.85	3044.53	3079.77	2496.74	2534.17	3135.03	3295.06	2906.11	2826.89	2956.84
480	2532.78	3304.58	3104.71	2974.73	2238.02	2398.92	2417.33	2649.16	2951.36	2955.21	2351.62	2596.25
540	2970.47	2494.14	2102.78	1647.15	1453.07	2264.16	2465.66	2702.6	2146.03	2322.19	1545.71	1650.65
	Scar shRNA
0	2163.39	1866.68	2132.72	1956.77	2058.06	1844.01	2081.42	1662.36	1925.56	1864.15	1728.09
60	2371.71	2277.92	2379.05	1976.17	2330.53	2008.64	2007.72	1431.44	1690.24	1532.47	1642.03
120	3048.46	3091.01	2527.13	2054.1	2352.84	2139.55	2115.83	2513.8	2310.77	2663.64	2362.93
180	3274.97	3433.2	2453.79	2560.75	2634.56	3443.83	3013.42	2660.76	3742.14	3340.59	2874.22
240	3553.27	3488.09	3457.78	2603.44	2529.38	3361.56	3273.66	2542.29	3415.27	2873.59	3090.94
300	3266.92	3570.19	2702.03	2375.72	2234.19	2955.59	2893.76	2711.99	3088.89	2836.8	2598.58
360	2995.11	3083.9	2790.04	2149.47	2171.59	2638.26	2812.82	2575.64	2958.87	2851.59	2247.23
420	2691.68	2835.01	2758.54	2004.61	2072.59	2542.55	2817.34	2557.71	2988.05	2870.49	2475.24
480	1777.4	2840.9	2393.33	2081.37	1762.46	2364.75	2584.27	2333.63	2495.36	2627.69	2399.86
540	1204.92	2292.98	1051.23	1923.23	1739.09	2328.75	2353.12	1974.38	1858.22	2037.03	2671.2
	Carmil shRNA
0	2180.94	1667.84	2036.89	1803.83	2501.78	2357.73	2418.64	2759.82	2053.24
60	2273.83	2106.32	1963.48	2000.11	2533.17	2490.71	2504.3	2581.57	2298.54
120	2606.99	2948.07	2665.02	2101.28	1653.33	1363.69	3197.63	3209.96	2953.05
180	2654.94	2530.45	2593.98	3019.79	2243.67	1987.04	4052.24	3959.98	3708.6
240	1676.18	2012.88	1816.62	2917.44	2680.95	2798.13	3582.1	3020.81	3148.44
300	1542.57	1934.44	1774.46	2847.97	3388.18	3099.64	2750.17	2315.85	2579.88
360	2216.62	1958.55	1640.78	1753.71	2360.64	2216.14	2732.05	2375.84	2596.94
420	1769.75	1271.51	1402.52	2075.37	2836.08	2493.98	2696.73	1972.7	2381.64
480	1799.32	2037.59	2015.59	2089.91	2760.9	2646.42	2944.03	1779.84	2609.75
540	1668.09	1938.18	1685.4	2027.43	2473.6	2874.12	2499.45	992.772	2375.7

## Sheet: O
	Arp3GFP intensity (average)	SEM			WT	ArpC4 shRNA	DPod1 shRNA	Coronin shRNA	Scar shRNA	Cortactin shRNA	Dia shRNA
WT	174.322	7.88986			173.684	37.0258	58.4628	69.4003	91.1275	136.027	195.015
ArpC4 shRNA	27.1266	2.93223			159.533	35.4435	85.9246	40.2885	137.754	161.21	181.732
DPod1 shRNA	70.0571	3.35421			130.345	34.9892	70.6577	37.006	158.939	166.098	172.878
Coronin shRNA	97.4364	7.49703			132.302	28.7002	65.8768	73.4548	100.34	157.454	136.095
Scar shRNA	135.779	8.87865			165.906	18.1477	44.5474	94.3683	75.5489	201.706	138.681
Cortactin shRNA	147.421	9.47865			176.437	19.9779	86.8353	83.3621	169.209	98.7776	121.57
Dia shRNA	169.456	5.95701			168.282	19.5753	81.6695	119.936	166.892	114.828	174.327
					199.679	28.9089	42.8337	61.9904	41.717	165.684	176.448
					213.292	38.159	65.0352	88.2892	116.975	205.873	122.561
					215.026	50.7028	74.751	106.977	194.73	198.157	96.9166
					201.22	58.0244	73.1696	55.0187	206.26	180.478	159.714
					187.301	13.9826	37.446	9.00717	217.726	159.419	181.622
					143.177	30.2287	72.1522	22.7984	169.61	128.611	214.746
						20.3118	66.9562	54.5914	82.3828	49.8871	205.866
						12.3732	84.2167	98.7659	115.355	81.197	204.867
						18.6299	117.68	156.972	117.544	152.864	207.537
						18.5169	70.6632	140.689	82.7418	149.56	184.987
						24.8212	72.9394	128.847	112.14	150.793	164.8
							50.4313	126.983	148.699	75.0727	201.249
							76.7241	123.035	149.492	204.145	174.463
							62.1529	101.365	137.884	84.3779	143.303
							51.5288	107.206	155.126	115.191	162.913
							73.9433	103.817	159.864	85.1448	182.995
							116.097	136.862	150.645	228.295	148.767
							97.7371	148.847		106.299	195.252
							69.9269	145.299		222.853	170.337
							77.354	157.2		200.357	209.49
							77.8297	152.537			115.649
							67.029	97.177
							31.5206	81.0035
							74.1166
							73.2547
							77.4806
							32.997

## Sheet: F3S1E,G,I
Time	WT		DPod1 shRNA		DPod1 shRNA 2		Coronin shRNA		Coronin shRNA 2		Cortactin shRNA		Cortactin shRNA 2
0	37.2248	2.23801	44.1524	3.07192	38.3956	3.56804	48.1645	3.99458	36.6882	2.43078	40.2199	2.0967	38.0128	2.4217
60	189.709	13.7302	211.73	10.704	167.262	7.74815	169.374	10.9039	163.233	7.06231	164.035	6.25327	180.142	7.90267
120	206.015	7.82294	232.157	9.118	191.424	9.20489	190.868	9.08602	174.498	7.1395	175.802	6.91383	212.973	12.755
180	193.672	5.31974	205.854	4.39341	185.138	6.17082	188.675	11.7537	178.337	6.94887	160.942	4.75953	200.494	8.67121
240	203.071	5.54695	192.204	8.72283	184.149	5.06912	171.664	8.4994	177.952	7.04658	160.313	5.36266	193.638	4.2767
300	216.705	5.84632	197.936	9.61094	185.141	9.06911	150.594	4.69859	177.343	4.74437	160.938	8.53716	182.441	3.5933
360	227.718	7.55651	199.724	12.7147	189.855	10.4245	148.981	2.37622	176.286	6.93115	152.345	9.5386	176.749	6.20289
420	236.809	7.68193	193.824	15.8311	174.663	12.1452	165.305	3.84577	163.023	7.39566	146.023	8.6932	179.378	9.04294
480	204.502	5.93583	151.338	15.6208	144.074	12.4216	171.438	8.82815	132.075	8.55168	130.63	7.15922	175.095	6.82226
540	133.903	8.80607	88.3634	8.27244	89.1212	9.79691	140.677	6.05774	100.367	8.9476	99.8724	5.40616	132.882	16.3529

## Sheet: F3S1E',G',I'.
Time	WT		DPod1 shRNA		DPod1 shRNA 2		Coronin shRNA		Coronin shRNA 2		Cortactin shRNA		Cortactin shRNA 2
0	2027.87	88.6706	535.8	37.92	1138.17	77.267	1353.06	94.3477	1685.79	113.047	1995.49	168.774	2276.32	129.302
60	2542.19	94.3652	522.519	47.236	1240.08	79.0978	1757.23	135.197	1744.04	109.261	2386.89	214.102	2347.96	178.042
120	2810.52	142.042	645.818	70.559	1598.27	98.7232	2251.68	169.626	2214.84	147.612	3160.5	209.06	2778.01	160.173
180	2822.94	135.374	714.246	79.6193	1799.06	132.367	2450.02	163.979	2368.49	181.537	3480.99	178.567	2772.48	151.517
240	2503.05	93.2797	677.08	64.786	1733.81	172.674	2172.38	105.928	2179.25	121.387	3371.57	112.812	3053.73	206.392
300	2322	41.2828	633.849	52.5595	1521.32	171.79	1900.37	150.676	1991.33	121.268	3277.35	104.684	2967.2	232.896
360	2243.99	39.3414	571.812	38.6612	1391.58	164.159	1833.14	132.404	1932.75	113.895	3085.48	83.7655	2803.53	198.636
420	2166.03	190.639	546.533	36.8017	1484.22	160.95	1988.68	66.2835	1664.94	76.0239	2896.66	69.6015	2737.71	168.773
480	2044.1	49.7619	512.75	39.5411	1355.98	208.747	1958.67	87.0841	1365.21	55.1367	2706.22	98.4461	2463.18	86.3886
540	1748.75	36.8543	562.388	61.3581	1148.94	193.062	1809.36	109.259	1261.55	66.722	2147.05	140.197	2108.12	78.2874

## Sheet: F3S1K,M
	WT cycle 11 cap size change		Wash shRNA		Wasp shRNA
0	1	0	1	0	1	0
	1.49023	0.10782	1.36041	0.03144	1.416	0.04626
	1.98118	0.17546	1.72334	0.05759	1.81995	0.06572
	2.38003	0.19847	2.25732	0.11132	2.45801	0.139
	2.82835	0.2047	2.5339	0.1206	2.88251	0.188
	3.22998	0.20981	3.20649	0.18113	3.39642	0.25317
	3.56259	0.22329	3.58101	0.1935	3.50534	0.28107
	3.93918	0.28074	3.97233	0.19921	3.97853	0.36595
	4.41407	0.35367	4.3587	0.22767	4.51131	0.38438
	4.70617	0.34697	4.64407	0.27676	5.12078	0.39042
	4.92877	0.35602	4.8588	0.27365	5.15609	0.43951
	5.07671	0.34861	5.17354	0.31563	5.25463	0.44601
60	5.20509	0.36181	5.30877	0.32317	5.51997	0.38666
	5.34171	0.35932	5.35627	0.28041	5.78556	0.35567
	5.35807	0.34689	5.53764	0.32863	5.96807	0.34356
	5.42648	0.33139	5.62078	0.28797	6.15176	0.32841
	5.55249	0.31878	5.63298	0.26019	6.13094	0.34871
	5.56387	0.34036	5.90667	0.33653	6.15819	0.40902
	5.70988	0.34987	5.88014	0.3958	6.26394	0.32693
	5.78849	0.34158	6.00576	0.39688	6.14789	0.32339
	5.75058	0.31513	6.02644	0.37751	6.195	0.29024
	5.76592	0.28653	6.00055	0.36509	5.91227	0.30886
	5.80059	0.30163	5.84351	0.32424	5.88994	0.30549
	5.81804	0.32306	5.80819	0.32644	5.85992	0.30706
120	5.7547	0.30609	5.68998	0.30117	5.97371	0.28509
	5.73897	0.31434	5.66417	0.30369	6.0237	0.33665
	5.72695	0.31215	5.55976	0.2761	5.9102	0.33353
	5.68515	0.31398	5.50881	0.28796	5.95834	0.34023
	5.66046	0.31442	5.43828	0.32766	5.85212	0.31907
	5.55979	0.32025	5.42327	0.29515	5.68981	0.29027
	5.62554	0.33872	5.47192	0.29018	5.606	0.31796
	5.53319	0.33201	5.37059	0.28326	5.59794	0.36392
	5.5223	0.34277	5.34383	0.28186	5.39866	0.40552
	5.4753	0.33046	5.30006	0.25502	5.3336	0.40858
	5.51202	0.32778	5.11185	0.24756	5.32744	0.38074
	5.45236	0.3327	5.15122	0.24694	5.36319	0.377
180	5.46374	0.33475	5.13216	0.21425	5.29339	0.38763
	5.41548	0.34745	5.24584	0.21636	5.23498	0.36281
	5.40081	0.35502	5.21659	0.23195	5.20954	0.36847
	5.42264	0.35967	5.29816	0.22074	5.11563	0.4009
	5.45389	0.3763	5.35974	0.23206	5.18755	0.42314
	5.50665	0.38266	5.51671	0.23974	5.18888	0.44132
	5.60766	0.38623	5.4519	0.24511	5.1925	0.4471
	5.59675	0.38302	5.49248	0.27229	5.2202	0.49254
	5.64219	0.37401	5.46305	0.28351	5.21283	0.49582
	5.68351	0.37331	5.56878	0.31133	5.25882	0.49883
	5.67264	0.37808	5.52384	0.31974	5.22022	0.51144
	5.72815	0.37969	5.59995	0.34356	5.25498	0.55864
240	5.74121	0.36193	5.66148	0.32377	5.35628	0.51202
	5.76359	0.37172	5.69154	0.34561	5.30531	0.53983
	5.8225	0.38154	5.77017	0.35432	5.50874	0.58089
	5.83544	0.38762	5.75568	0.35039	5.54651	0.60546
	5.93351	0.4044	5.71055	0.35715	5.51543	0.57401
	5.92674	0.40201	5.74525	0.34752	5.58503	0.5854
	6.00682	0.4162	5.84242	0.34614	5.69173	0.57657
	5.96133	0.39768	5.85536	0.33201	5.66094	0.59299
	5.99771	0.41516	5.87757	0.31438	5.75475	0.60226
	5.9718	0.39292	5.93503	0.32184	5.78238	0.5545
	6.04002	0.39703	5.95306	0.3169	5.84984	0.57078
	6.09855	0.38725	5.9296	0.33679	5.84525	0.56202
300	6.13017	0.3955	5.94391	0.3233	5.97692	0.58096
	6.23516	0.40876	6.01737	0.30048	6.0516	0.55831
	6.25307	0.39426	5.95914	0.32608	5.97617	0.54879
	6.21462	0.40309	5.98495	0.33222	5.99455	0.57547
	6.22925	0.37584	5.99568	0.31527	5.99311	0.55688
	6.27858	0.38129	6.06957	0.3445	6.01552	0.55337
	6.21855	0.37648	6.02189	0.34874	6.17257	0.58704
	6.2657	0.39337	6.04794	0.31339	6.23794	0.52198
	6.26193	0.39577	6.07743	0.31057	6.28847	0.55235
	6.3603	0.38733	6.11407	0.30704	6.17538	0.45736
	6.41344	0.39197	6.1733	0.32047	6.17494	0.49008
	6.3892	0.38853	6.19918	0.29498	6.17211	0.5138
360	6.40687	0.38618	6.23372	0.32624	6.32078	0.51232
	6.5104	0.39921	6.18659	0.30791	6.31601	0.51959
	6.56442	0.39675	6.17545	0.31246	6.42393	0.48728
	6.60269	0.42157	6.18539	0.29178	6.47807	0.47287
	6.62294	0.43061	6.14909	0.27835	6.43871	0.49315
	6.54135	0.43654	6.07067	0.32987	6.38192	0.45948
	6.62173	0.43948	5.94852	0.30645	6.31335	0.5319
	6.54836	0.44891	6.01274	0.31067	6.49495	0.54015
	6.5603	0.44923	5.99688	0.28452	6.49075	0.48264
	6.70134	0.42431	5.90869	0.27219	6.55108	0.49953
	6.63414	0.41911	5.82153	0.27908	6.45753	0.49111
	6.73724	0.43584	5.78834	0.25423	6.44286	0.49347
420	6.67797	0.418	5.67119	0.251	6.4168	0.53253
	6.62295	0.41803	5.48441	0.21419	6.19502	0.55495
	6.57258	0.42632	5.47484	0.19643	6.25063	0.56135
	6.61643	0.43541	5.40134	0.20662	6.27319	0.56257
	6.49951	0.41574	5.43784	0.16493	6.18916	0.60586
	6.42691	0.41107	5.18404	0.14797	6.22878	0.58684
	6.41136	0.42252	5.21552	0.13479	6.14618	0.65397
	6.39973	0.41203	5.03734	0.12117	6.26109	0.61744
	6.29814	0.4145	5.04342	0.11394	6.16001	0.61381
	6.28099	0.3924	4.92964	0.13833	6.14643	0.58512
	6.15359	0.3996	4.73065	0.13724	5.98314	0.59813
	5.99204	0.36705	4.39405	0.22545	6.10009	0.6313
480	5.7585	0.34871	4.48028	0.20413	5.98683	0.63795
	5.70241	0.35383	4.25927	0.14648	5.86995	0.64257
	5.57994	0.34342	4.20415	0.10894	5.69792	0.6799
	5.4282	0.32749	4.00444	0.15766	5.64305	0.67699
	5.27558	0.30436	3.7986	0.18473	5.34699	0.48527
	4.90251	0.25072	3.71092	0.15524	5.33319	0.54548
	4.81647	0.22069	3.54949	0.20814	5.2632	0.54575
	4.64366	0.2485	3.41575	0.19308	5.01101	0.46906
	4.47973	0.25962	3.08572	0.13866	4.7037	0.60145
	4.23136	0.25659	3.1389	0.11726	4.68242	0.64867
	4.07533	0.27273	2.94047	0.16922	4.3363	0.37509
	3.82077	0.26168	2.73414	0.18839	4.29095	0.36932
540	3.70454	0.30144	2.56838	0.1548	4.1526	0.23254
	3.65561	0.31501	2.41544	0.11225	3.61594	0.35004

## Sheet: F3S1K',M'.
Wash & Wash shRNA cap area									Wash & Wash shRNA cap average intensity
	WT cycle 11 cap area		Wasp shRNA		Wash shRNA					WT		Wasp shRNA		Wash shRNA
0	37.2248	2.23801	35.0772	2.98622	35.7431	2.42887			0	2027.87	88.6706	1903.6	55.5104	2167.22	171.956
60	189.709	13.7302	190.304	10.7581	185.201	9.1449			60	2542.19	94.3652	2335.35	44.5849	2179.91	89.9238
120	206.015	7.82294	204.936	12.8457	198.883	8.71794			120	2810.52	142.042	2821.28	46.0014	3139.43	263.646
180	193.672	5.31974	177.348	6.39193	181.104	10.0557			180	2822.94	135.374	3089.64	46.8988	3220.09	75.7169
240	203.071	5.54695	185.733	6.4031	200.594	15.82			240	2503.05	93.2797	2473.75	75.5091	2761.83	108.631
300	216.705	5.84632	199.274	5.59421	211.425	17.3751			300	2322	41.2828	2374.23	131.246	2623.71	168.158
360	227.718	7.55651	207.408	5.67504	224.856	22.6401			360	2243.99	39.3414	2236.86	65.9071	2319.04	215.925
420	236.809	7.68193	216.74	6.21387	205.936	21.3112			420	2166.03	190.639	1867.28	43.8372	2441.67	189.811
480	204.502	5.93583	193.295	17.9071	161.847	15.024			480	2044.1	49.7619	1832.06	58.5197	2140.14	146.376
540	133.903	8.80607	143.182	15.4455	92.4811	9.75871			540	1748.75	36.8543	1603.13	57.922	2062.56	240.247
