# Supplementary material for: Combinatorial deployment of F-actin regulators to build complex 3D actin structures in vivo
Source: eLife. 2021 May 5;10:e63046. doi: 10.7554/eLife.63046 (PMC8149123; doi:10.7554/eLife.63046)
Supplement: Figure 4—source data 1. [file elife-63046-fig4-data1.xlsx]

## Sheet: G,I,K
Distance	Coro (WT) early	Coro (WT) late	CTTN (WT) early	CTTN (WT) late	CTTN (Coro shRNA) early	CTTN (Coro shRNA) late
1				3.52218
2				4.24312
3				6.52048
4				10.3105
5		45.0898		12.8824
6		53.6708		13.7626
7		55.7807		13.2866
8		56.0368		13.4259
9		54.7453		12.2402
10		61.8339		11.9174
11		69.1017		13.6633
12		77.7037		17.8647
13		88.7641		18.3519
14		105.039		19.3238
15		113.176		21.6916
16		115.919		25.2299
17		113.662		29.5033
18		109.064		39.1981	49.2476
19		101.389		45.1925	53.803
20		89.4745		48.7968	57.2204
21		78.3875		48.4973	59.9041
22		76.6124		45.8861	59.8746	56.0538
23		85.5002		38.414	63.2601	62.1709
24		101.343	16.463	32.9969	62.3455	65.3626
25		100.112	16.8096	28.7401	61.0855	68.9923
26	35.7011	108.809	17.3837	28.324	72.1056	71.5905
27	38.4448	116.88	23.3521	27.4955	82.8862	70.3791
28	40.669	115	31.4811	25.774	93.6192	68.0011
29	45.7716	114.892	36.5235	25.9126	98.9251	68.9138
30	50.0998	138.682	38.4099	28.9959	108.856	68.34
31	52.0271	143.603	44.5923	29.8378	104.882	70.5907
32	48.0935	136.06	51.1852	27.7639	104.15	78.1621
33	49.7521	130.341	52.718	26.9115	101.841	85.5595
34	50.0083	112.374	54.1537	24.9261	100.18	93.5834
35	49.1799	96.1913	58.7189	19.0468	94.5628	95.8554
36	51.2984	89.2698	61.5863	13.0422	91.145	101.343
37	54.0733	87.4302	61.7785	9.27598	95.7187	105.412
38	53.3104	83.3794	68.9441	6.76234	87.1469	106.151
39	54.8079	86.0958	76.6713	4.85218	94.942	112.858
40	62.7269	86.7282	82.0122	6.93864	99.4751	124.262
41	70.4956	95.6421	82.7101	10.8241	115.701	129.205
42	75.3484	115.271	79.36	13.3633	134.425	142.76
43	71.6476	120.449	72.5311	14.0585	153.58	146.035
44	74.1712	116.606	66.6447	14.3301	148.239	136.579
45	68.0771	117.413	59.5548	11.5013	142.026	125.569
46	65.3386	113.747	57.4802	8.20004	119.274	117.075
47	61.5711	96.3455	53.9296	5.36728	84.4274	99.9758
48	67.2343	93.2096	49.1152	4.63536	69.8711	86.3962
49	62.7061	104.721	52.3171	4.4951	78.9283	86.158
50	59.8579	106.12	60.5489	4.59648	95.905	85.6654
51	64.4136	108.56	67.1162	4.11426	112.987	80.5262
52	67.4068	116.916	69.8687	4.85908	121.89	80.7843
53	66.386	122.395	76.6982	5.3013	122.425	92.2516
54	70.1881	117.721	77.8889	4.77954	115.624	101.796
55	76.4135	117.366	72.6729	4.98348	104.566	109.897
56	81.5995	115.295	61.2795	4.30194	101.047	118.885
57	93.4842	108.447	53.2691	3.99556	100.689	118.129
58	104.5	103.002	44.9932	3.71562	103.908	108.253
59	107.221	94.0964	39.0893	4.44098	112.866	98.5089
60	111.773	92.3032	36.4907	4.75986	122.095	99.0435
61	108.406	92.0704	45.8877	5.61298	122.135	104.364
62	99.0803	98.6808	56.4299	6.21944	127.776	103.892
63	91.0939	98.6321	60.7095	7.28532	132.427	104.308
64	83.7152	100.845	63.9094	6.96778	132.621	98.3661
65	78.0611	99.7286	67.5744	6.31168	117.044	92.318
66	78.8834	94.3966	64.3357	6.02914	111.466	88.6406
67	84.6336	81.8446	60.8955	5.61932	98.7995	92.361
68	83.5804	79.406	59.026	5.03442	84.5839	97.3069
69	89.7433	79.3784	51.7159	5.85556	66.1709	103.098
70	94.7491	82.5753	44.5711	6.4647	67.2492	111.011
71	104.393	84.4007	41.2817	6.4292	68.8778	120.326
72	108.715	96.6197	43.3975	6.7385	90.6516	117.678
73	116.721	101.048	49.2158	6.3543	120.165	115.401
74	123.729	104.128	59.8405	5.6636	139.08	111.389
75	125.809	95.9945	68.3721	5.36592	157.596	99.6366
76	121.237	90.2009	67.0071	5.78876	167.186	91.1111
77	124.736	79.0656	58.0661	7.00722	149.837	93.6166
78	129.287	84.2127	49.8719	10.2677	126.509	100.836
79	125.486	91.4057	42.4197	15.2462	107.829	117.581
80	114.596	103.834	38.9362	22.2962	86.8103	124.076
81	113.076	122.839	40.9476	28.7219	77.9878	112.135
82	115.672	130.373	50.0527	32.8279	76.6369	106.352
83	112.05	128.44	56.5409	33.7833	74.973	95.6239
84	118.381	117.529	68.3868	30.7381	76.5433	74.5868
85	128.997	111.796	84.3348	24.5677	75.5961	63.8691
86	118.253	99.7982	101.173	20.9123	68.1214	63.2131
87	97.6167	91.5088	106.163	21.5988	71.1141	55.9873
88	88.8157	104.891	104.543	24.2389	85.5056	51.4373
89	80.7006	109.642	93.0339	25.8497	85.9521	51.6422
90	77.1057	109.032	77.7285	27.6764	84.8538	50.0969
91	89.9312	111.382	61.5724	30.232	83.1766	46.8727
92	102.996	115.186	51.4636	29.9405	73.0988
93	101.212	99.3817	48.9744	29.0151	51.9653
94	100.519	97.2315	48.1511	29.4369	46.3309
95	104.044	106.719	41.8446	31.6658	44.9171
96	89.4409	106.069	36.9986	32.5296	44.0808
97	76.7497	103.691	35.6114	36.5845
98	83.6023	98.3023	36.4924	39.0792
99	81.4694	99.5878	35.7953	42.1512
100	74.7274	90.7418	36.7805	46.7143
101	77.772	93.7723	36.5754	53.4827
102	83.2874	99.1416	34.3351	49.3726
103	88.0978	94.7683	28.304	48.0253
104	90.396	89.888	24.7578	47.2329
105	86.0734	92.588	23.8013	46.7891
106	74.326	87.4039		45.1451
107	61.3833	89.3388		48.1949
108	49.6031	104.792		53.6277
109	52.0818	118.345		53.1727
110	65.1307	119.29		48.3616
111	77.0465	122.388		41.9521
112	81.7175	130.84		39.768
113	78.3113	132.938		33.4767
114	70.2762	127.571		30.515
115	54.8752	118.753		31.614
116	47.353	113.358		31.5017
117	40.328	96.69		28.5683
118	36.2656	87.0866		26.2449
119	33.3443	81.2186		27.2113
120	30.7824	77.1329		27.3249
121	28.2257	79.7536		27.9546
122		98.0162		25.2504
123		107.6		21.8574
124		112.166		18.5893
125		126.286		13.4406
126		133.296		7.31182
127		127.222		6.08586
128		123.389		6.29298
129		126.753		5.84672
130		124.137
131		122.813
132		119.318
133		114.055
134		112.918
135		104.583
136		88.0274
137		79.3165
138		76.7408
139		67.5858
140		63.1838
141		65.856
142		59.2555
143		53.1695
142		59.2555
143		53.1695
144
145
146
147
148
149
150
151
152
153
154
155
156
157
158
159
160
161
162
163
164
165
166
167
168
169
170

## Sheet: F4S1Sheet1
	Primer set 1, normalized expression level	SEM	Primer set 2, normalized expression level	SEM
Sqh	2.53388	0.03691
Rh3	0.01638	0.18431
DPod1	3.09684	0.02412	3.30789	0.02061
Coronin	3.44277	0.34271	2.32704	0.06746
Cortactin	1.71593	0.09994	2.26425	0.15406
Arp 14D	4.39638	0.04732
sop2	1.33575	0.06916
dia	0.69573	0.04802	0.71228	0.04926
WASp	1	0.0519	0.99272	0.08368
SCAR	0.61722	0.03576	0.92671	0.01248
Carmil	0.4097	0.11606	0.21166	0.12037
wash	0.19365	0.06381
