# Supplementary material for: Combinatorial deployment of F-actin regulators to build complex 3D actin structures in vivo
Source: eLife. 2021 May 5;10:e63046. doi: 10.7554/eLife.63046 (PMC8149123; doi:10.7554/eLife.63046)
Supplement: Figure 5—source data 1. [file elife-63046-fig5-data1.xlsx]

## Sheet: B
Time (S)	Normalized intensity
-1	1
0	0.16995
1	0.23569
2	0.29144
3	0.33085
4	0.37288
5	0.42264
6	0.45826
7	0.49807
8	0.51926
9	0.54006
10	0.57764
11	0.60843
12	0.61787
13	0.64273
14	0.65867
15	0.67109
16	0.67943
17	0.69981
18	0.73749
19	0.73938
20	0.75618
21	0.76229
22	0.77766
23	0.78125
24	0.77103
25	0.76399
26	0.79635
27	0.81317
28	0.82234
29	0.82657
30	0.81835
31	0.80411
32	0.84872
33	0.84288
34	0.85135
35	0.84229
36	0.85432
37	0.86093
38	0.85365
39	0.87478
40	0.88152
41	0.88129
42	0.85216
43	0.8399
44	0.86285
45	0.84963
46	0.86543
47	0.86447

## Sheet: C,D
cap and furrow T50 (s)	Cap actin (average)	(SEM)			Immobile fraction	Cap actin (average)	(SEM)
	8.45066	0.68643				0.187001	0.0174951
	Furrow actin (average)	(SEM)				Furrow actin (average)	(SEM)
	14.4888	1.04753				0.108177	0.0182692
cap and furrow T50 (s)	Cap	Furrow			Immobile fraction	cap	Furrow
	5.90598	15.2559				0.166586	0.143137
	8.51215	12.4169				0.247213	0.099897
	6.99033	15.7937				0.166592	0.081497
	10.0192					0.184675
	9.98707					0.130655
	9.2892					0.226285

## Sheet: E,F
T50				Immobile fraction
WT	ArpC4 shRNA	Dia shRNA		WT	ArpC4 shRNA	Dia shRNA
7.681	5.233	6.224		0.235853	0.155702	0.125442
8.8615	5.135	4.8725		0.183969	0.209839	0.234871
7.924	4.935	4.181		0.397879	0.20126	0.231571
7.592	3.653	4.437		0.181359	0.401823	0.249499
8.292	4.567	4.234		0.104591	0.385888	0.118448
9.132	5.409	4.121		0.133207	0.283514	0.242008
9.044	4.504	6.558		0.122767	0.28325	0.207212
9.3725	3.7105	5.977		0.279364	0.37145	0.224126
10.1365	3.8075	5.459		0.344252	0.265055	0.185232
8.96	3.986			0.268567	0.255865
7.021	5.225			0.204944	0.287586
8.442	3.725			0.305409	0.303241
10.58	4.717			0.267807	0.223893
	3.752				0.288282

## Sheet: F5S1A
WT	ArpC4 shRNA	Dia shRNA	DPod1 shRNA	Cortactin shRNA	Coronin shRNA	Scar shRNA	Cofilin shRNA
7.681	5.233	6.224	7.529	8.527	5.611	7.566	9.329
8.8615	5.135	4.8725	3.577	5.329	7.238	8.273	8.083
7.924	4.935	4.181	4.4135	3.475	8.527	7.055	9.873
7.592	3.653	4.437	6.1705	8.092	5.329	7.6565	8.031
8.292	4.567	4.234	5.394	4.567	6.329	10.0695	10.5
9.132	5.409	4.121	5.501	6.032	5.7175	7.272
9.044	4.504	6.558	4.681	6.486	6.201
9.3725	3.7105	5.977	2.926		5.58
10.1365	3.8075	5.459	5.5365		7.421
8.96	3.986
7.021	5.225
8.442	3.725
10.58	4.717
	3.752

## Sheet: F5S1B (2)
WT	Arp shRNA	Dia shRNA	DPod1 shRNA	Cortactin shRNA	Coronin shRNA	Scar shRNA	Cofilin shRNA
0.23849	0.258383	0.125442	0.286065	0.288034	0.296881	0.188583	0.244478
0.184075	0.309069	0.234871	0.254376	0.288034	0.460722	0.32148	0.1458
0.332542	0.346606	0.231571	0.426138	0.346606	0.305987	0.1229	0.21048
0.181359	0.398585	0.249499	0.414149	0.401823	0.397277	0.108493	0.238454
0.159539	0.442335	0.118448	0.385473	0.367017	0.236986	0.129356	0.131613
0.150892	0.337672	0.242008	0.405635	0.347995	0.345932	0.251471
0.122767	0.394511	0.207212	0.28034	0.206242	0.237134
0.279364	0.368413	0.224126	0.489136	0.466039	0.230581
0.344252	0.426812	0.185232	0.306239		0.31224
0.268567	0.372712
0.204944	0.265157
0.305409	0.30716
0.267807	0.195695
	0.302315

## Sheet: F5S1C,D (2)
T50	Control	Control + Jasp	Control + LatB	Arp shRNA	Arp shRNA + Jasp				Immobile fraction	Control	Control + Jasp	Control + LatB	Arp shRNA	Arp shRNA + Jasp
	7.17732	16.3642	14.8071	4.28225	4.28225					0.191927	0.426674	0.169928	0.339198	0.356467
	7.51742	15.4963	13.9345	4.31545	4.31545					0.098818	0.272351	0.180794	0.274821	0.281294
	9.01363	13.8688	11.4396	3.62985	5.43822					0.162146	0.353056	0.344938	0.307788	0.396675
	9.98736	13.8958	9.59819	4.07258	5.35322					0.219449	0.387521	0.349772	0.30279	0.393309
	9.87467	13.5375	8.4889	3.93275	5.03471					0.247213	0.200815	0.281002	0.25256	0.362414
	7.75664	14.0067								0.166592	0.307794			0.334783
	9.41197	13.0464								0.184675	0.312301
	5.90598	10.2118								0.140655	0.4183
	8.51215
	6.99033
	10.0192
	9.98707
	9.2892
