# Supplementary material for: Combinatorial deployment of F-actin regulators to build complex 3D actin structures in vivo
Source: eLife. 2021 May 5;10:e63046. doi: 10.7554/eLife.63046 (PMC8149123; doi:10.7554/eLife.63046)
Supplement: Figure 6—source data 1. [file elife-63046-fig6-data1.xlsx]

## Sheet: B,D,F,H,J,L,N
	Arp3:GFP	mito:mCh:Coro		Arp3:GFP	mito:mCh:Cortactin		Arp3:GFP	mito:mCh:DPod1		Arp3:GFP	mito:mCh:Scar		Arp3:GFP	mito:mCh		Arp3:GFP	mito:mCh:Scar+DPod1		Arp3:GFP	mito:mCh:Coro+Cort
1	2.80527	0.77029		7.92747	11.3388		8.1433	7.29523		11.6999	14.7376		24.1274	14.0977		22.9923	20.2418		24.4697	33.2558
2	3.10499	1.72751		13.4802	10.5186		8.4109	8.25763		13.0811	16.6285		25.2556	16.4026		26.2842	20.0525		24.9597	28.0337
3	3.98493	3.97635		28.912	15.8282		10.0376	12.7041		13.7975	18.6681		26.2096	13.6997		33.0848	17.6075		24.4892	23.4139
4	5.79628	8.86297		51.9056	30.9572		14.4793	21.3286		14.9429	19.8959		34.8799	14.8036		42.0789	15.2125		23.9101	21.9589
5	8.17963	15.1533		70.8675	45.2314		19.5754	31.2725		15.7603	20.5966		47.962	16.3854		49.0527	18.2728		25.9224	22.4888
6	10.4061	21.3382		75.0654	49.9742		22.7498	40.1919		15.9584	24.3744		59.0598	14.858		60.1118	22.2197		26.8178	22.1765
7	12.0819	25.8485		65.9597	43.5964		23.0152	41.9257		16.6863	23.7299		62.5795	12.5355		62.9702	23.8666		31.2908	23.2546
8	12.6564	28.3923		52.3074	33.1673		23.1128	36.3072		14.1856	26.8629		56.7827	7.80016		68.9667	28.3871		35.7844	24.6968
9	12.6864	29.9369		39.0737	24.5241		22.9556	27.8628		13.5403	26.5907		48.5999	8.01094		66.7742	27.9179		38.4154	30.5314
10	12.8474	29.6994		31.3122	19.9842		21.1383	19.928		10.7583	31.8445		41.1763	13.4055		66.854	31.4556		33.2642	40.1845
11	13.5525	28.4818		24.6721	18.41		15.9289	16.2049		13.6187	34.1782		32.0855	13.7899		62.1964	24.7381		29.2691	51.7915
12	13.7612	25.7103		22.5944	18.1679		10.8017	12.2716		14.4742	32.1938		23.0228	12.3202		59.1985	23.2076		23.2399	58.209
13	13.4534	23.9765		19.6008	15.6553		7.94407	11.0909		14.5468	26.6956		14.5099	9.45457		58.9394	18.5464		22.1669	59.9338
14	13.3765	21.6429		16.5344	17.1578		7.3172	9.2851		11.1223	18.0435		12.1443	11.4453		59.3003	17.9692		22.4464	58.4824
15	12.9632	19.4306		12.8723	17.4351		7.90307	10.2306		8.93983	13.2278		17.7609	17.01		48.0773	16.0708		24.8751	55.0911
16	12.6352	17.7275		10.319	16.4483		8.039	9.04623		8.47913	11.4327		31.4075	23.7021		41.0227	13.8242		26.2445	49.8906
17	11.7195	18.3309		10.224	14.5423		8.9529	10.1635		8.11867	11.2459		46.3988	21.6134		30.9555	12.2766		27.4313	42.8723
18	12.2495	20.5094		10.4629	13.1509		7.9921	9.4199		6.67503	11.0917		56.3122	16.5477		33.2684	12.5626		27.0076	38.112
19	13.5085	22.1329		10.7622	11.6296		7.15913	8.2884		5.2596	10.3591		58.162	9.98103		30.828	12.0425		22.9257	34.1921
20	15.0941	24.2101		10.2031	11.1316		6.03173	5.70687		4.62263	11.2827		54.8371	13.1217		29.9511	11.5279		19.4031	32.1189
21	16.0858	24.1355		12.3524	13.4227		7.28673	6.4055		4.6394	10.7979		47.2978	14.0497		28.1494	10.0008		19.5618	30.817
22	16.2141	23.543		15.8264	20.3288		11.729	9.42467		6.01817	11.7882		42.3019	11.934		26.8876	11.3699		19.1069	30.3503
23	15.9462	21.2039		24.5041	27.4967		16.2538	13.1799		9.0493	12.0674		39.8947	21.8007		30.0362	11.81		17.9615	31.1465
24	15.2129	19.6573		34.4533	36.0948		19.8343	15.1232		13.1584	15.8101		37.6554	34.907		32.0074	11.1165		15.235	31.3618
25	14.3966	16.9129		42.783	41.5871		19.6991	19.2767		16.8636	19.5532		34.6753	54.9467		32.3624	8.96633		17.4284	32.8683
26	10.9164	13.4579		47.6235	48.5014		21.3876	25.0808		19.4152	23.033		30.7974	57.7467		31.3042	8.03186		17.5015	34.8001
27	7.72059	9.58312		46.4106	47.9857		21.6087	30.9733		21.2429	26.6292		32.0935	63.8909		28.7464	7.82377		17.5611	36.5223
28	4.07731	5.90247		43.3603	43.2004		23.9681	32.4461		20.2291	28.64		28.1677	56.7845		30.7273	7.46141		17.9815	39.3247
29	3.08262	2.73179		43.9411	36.0095		22.0192	31.1603		16.9453	28.5573		21.5825	48.6354		31.0762	6.21908		18.6931	41.947
30	2.09908	0.80152		46.9357	39.1712		20.0691	27.2195		12.7147	26.373		10.6783	27.9403		32.4155	6.81925		20.4564	47.5894
31	2.50827	0.63925		52.3121	49.9703		15.8797	23.0032		13.4391	23.39		4.94085	14.4036		31.657	7.75717		20.8421	54.784
32	2.54334	1.16753		50.146	52.7115		12.4634	19.5451		14.0204	20.5417		3.50868	5.16633		30.666	9.71929		22.9103	55.5965
33	2.50432	2.02971		42.514	43.7326		10.1326	15.6421		13.6659	18.5733		6.41922	4.13054		30.3641	12.4131		28.2758	53.1518
34	1.36228	2.64885		30.4643	31.8482		8.32227	11.4946		12.387	18.4372		6.41922			32.1116	11.8212		33.9141	44.6941
35	1.0136	3.18087		19.9257	24.317		8.67153	9.29393		12.0157	19.5855		3.50868			31.3804	19.0109		41.3354	43.7123
36	0	3.53477		12.5617	17.8165		9.8011	9.6292		11.8719	19.2796		3.50868			32.6805	19.2506		51.0707	44.1916
37				9.3139	13.2102		9.41257	10.3662		8.77457	18.4601					33.9442	21.0483		63.3575	45.8233
38				7.1984	10.2085		8.557	8.57597		6.3745	16.3028					40.0773	17.2491		68.087	44.1344
39				7.0226	11.1369		7.1261	7.5224		5.28383	14.6393					43.8849	25.0744		63.9082	40.4912
40																48.0441	37.5564		48.7457	36.1689
																54.4569	46.5032		39.4518	32.1291
																60.4242	47.7728		32.0581	30.2777
																64.6917	48.6215		31.3564	30.1887
																66.3394	58.4342		29.4431	31.4703
																67.8582	68.5734		28.7688	34.8944
																68.6562	75.1713
																62.7529	65.2403
																54.2444	53.0532
																47.3636	42.0149
																46.5022	33.2644
																46.2963	25.6982
																42.6008	17.5602
																38.806	13.3997

## Sheet: O,P
Percent	average	SEM
DPod1	0.87669	0.03284
Cortactin	0.76032	0.05042
Coronin	0.42361	0.0758
Scar	0.54372	0.05147
Coronin+Cortactin	0.02364	0.00752
DPod1+Scar	0.96118	0.0127
Control	0.01331	0.0048
Recruitment coefficient
DPod1	2.96246	0.14328
Cortactin	1.22152	0.06568
Coronin	0.26752	0.03201
Scar	2.80234	0.08635
Coronin+Cortactin	0.23968	0.01125
DPod1+Scar	4.84289	0.38733
Control	0.10432	0.01857
