# Supplementary material for: Combinatorial deployment of F-actin regulators to build complex 3D actin structures in vivo
Source: eLife. 2021 May 5;10:e63046. doi: 10.7554/eLife.63046 (PMC8149123; doi:10.7554/eLife.63046)
Supplement: Figure 7—source data 1. [file elife-63046-fig7-data1.xlsx]

## Sheet: B,C
	cyc13 nuclear fallout ratio	SEM	Area change	SEM
WT	0.03731	0.0118	5.7547	0.30609
ArpC4 shRNA	0.57053	0.07811	1.64075	0.06834
Dia shRNA	0.09061	0.02192	3.71354	0.11207
DPod1 shRNA	0.1492	0.05813	5.51843	0.4291
Coronin shRNA	0.24902	0.03858	4.34099	0.33002
Cortactin shRNA	0.32327	0.09219	3.77267	0.21064
Scar shRNA	0.21755	0.04098	3.85753	0.56353
Carmil shRNA	0.01917	0.00768	5.68113	0.49683
